1 Title: **MSK phosphorylation of H3S28 is required for immediate early gene**  
2 **induction and cardiac hypertrophy**

3 Running title: **MSK-mediates cardiac hypertrophy**

4

5 Emma L. Robinson<sup>1,2\*†</sup>, Faye M Drawnel<sup>3,4\*</sup>, Saher Mehdi<sup>1\*</sup>, Caroline R. Archer<sup>3</sup>, Wei  
6 Liu<sup>5</sup>, Hanneke Okkenhaug<sup>3</sup>, Kanar Alkass<sup>6</sup>, Jan Magnus Aronsen<sup>7,8</sup>, Chandan K  
7 Nagaraju<sup>1</sup>, Ivar Sjaastad<sup>7,9</sup>, Karin R Sipido<sup>1</sup>, Olaf Bergmann<sup>10</sup>, J. Simon C. Arthur<sup>11</sup>,  
8 Xin Wang<sup>5</sup>, and H. Llewelyn Roderick<sup>1,9†</sup>

9 <sup>1</sup> KU Leuven, Department of Cardiovascular Sciences, Laboratory of Experimental  
10 Cardiology, B-3000, Leuven, Belgium.

11 <sup>2</sup> Department of Cardiology, Cardiovascular Research Institute Maastricht, Maastricht  
12 University, The Netherlands

13 <sup>3</sup> Epigenetics and Signalling Programmes, Babraham Institute, Cambridge, United  
14 Kingdom

15 <sup>4</sup> Roche Pharma Research and Early Development, Roche Innovation Center Basel,  
16 F. Hoffmann-La Roche Ltd, Basel, Switzerland

17 <sup>5</sup> Faculty of Biology, Medicine and Health, University of Manchester, United Kingdom

18 <sup>6</sup> Karolinska Institutet, BioClinicum, Oncology and Pathology, SE-17177 Stockholm,  
19 Sweden; The National Board of Forensic Medicine, Stockholm, Sweden

20 <sup>7</sup> Institute for Experimental Medical Research, Oslo University Hospital and University  
21 of Oslo, Oslo, Norway

22 <sup>8</sup> Bjørknes College, Oslo, Norway

23 <sup>9</sup> KG Jebsen Center for Cardiac Research, University of Oslo, Norway

24 <sup>10</sup> Karolinska Institutet, Biomedicum, Cell and Molecular Biology, SE-17177

25 Stockholm, Sweden

26 <sup>11</sup> Division of Immunology and Cell Signalling, School of Life Sciences, University of

27 Dundee, Dundee, United Kingdom

28

29

30

31

32

33

34

35

36

37 \*These authors contributed equally

38 †For correspondence: *E-mail*: [llewelyn.roderick@kuleuven.be](mailto:llewelyn.roderick@kuleuven.be);

39 [e.robinson@maastrichtuniversity.nl](mailto:e.robinson@maastrichtuniversity.nl)

40 Some of this work was carried out while ELR and HLR were at the Babraham Institute.

41 Current affiliations: CA is at Safety and ADME Translational Sciences, Drug Safety and  
42 Metabolism, IMED Biotech Unit, AstraZeneca, Cambridge, United Kingdom. SM is at  
43 Wellwise, Research and Development, IIIT Innovation and Incubation, IIIT Delhi, New  
44 Delhi, India. HO is at the Imaging Facility, Babraham Institute, Cambridge, United  
45 Kingdom

46 **Key words:** cardiomyocyte; MSK; phosphorylated Histone 3 Serine 28; immediate  
47 early genes; hypertrophy

48 **Brief summary one sentence:** MSK1/2 phosphorylation of Histone 3 Serine 28  
49 couples MAPK signalling with chromatin remodelling and immediate early gene  
50 expression to induce pro-hypertrophic cardiac transcriptional responses.

51

52 **Abbreviations:**

53 Ascending aortic banding, AB; atrial natriuretic factor, ANF/Nppa; brain natriuretic  
54 factor; BNP/Nppb; cardiovascular disease, CVD; chromatin immunoprecipitation,  
55 ChIP; cytosine b-D-arabinofuranoside; ara-C; Ca<sup>2+</sup>/calmodulin-dependent protein  
56 kinase, CaMKII; endothelin-1, ET-1; extracellular signal-regulated kinase 1/2, ERK1/2;  
57 fractional shortening, FS; G-protein coupled receptor, GPCR; heart failure, HF; Histone  
58 3, H3; Histone H3 Serine 10, H3S10; phosphorylated H3S10, p-H3S10; Histone H3  
59 Serine 28, H3S28; phosphorylated H3S28, pH3S28, hours, h; immediate early gene,  
60 IEG; knockout, KO; mitogen activated protein kinase, MAPK; mitogen and stress  
61 activated kinase, MSK; isoproterenol, Iso; minutes, min; myosin heavy chain,  $\alpha$   
62 isoform,  $\alpha$ -MHC; myosin heavy chain,  $\beta$  isoform,  $\beta$ -MHC; neonatal rat ventricular  
63 myocytes, NRVMs; nuclear factor of activated T cells, NFAT; PD184352 (inhibitor of  
64 the upstream kinase of ERK1/2, MEK1/2), PD; posterior wall thickness in diastole,  
65 PWd; serum response factor, SRF; transverse aortic constriction, TAC; small  
66 interfering RNA, siRNA; wild type, WT.

67

68

69

70 **Abstract**

71 Heart failure is a leading cause of death, developing subsequent to deleterious  
72 hypertrophic cardiac remodelling associated with pathologies including hypertension  
73 and myocardial infarction. MAPK signalling pathways, acting via transcription factors,  
74 play a key role in coordinating the induction of gene expression during hypertrophy.  
75 Induction of the immediate early gene (IEG) response, characterised by increased  
76 expression of AP-1 factors, is a necessary and early event in this process. How MAPK  
77 signalling and IEG expression are coupled during cardiac hypertrophy is not yet  
78 resolved. Here, in vitro, in rodent models and in human samples, we demonstrate that  
79 the MAPK-stimulated IEG response depends on the mitogen and stress activated  
80 protein kinase (MSK) and its phosphorylation of histone H3 at serine 28 (H3S28). Brg-  
81 1, a BAF60 ATP-dependent chromatin remodelling complex component, is recruited to  
82 IEG promoters harbouring phosphorylated H3S28, initiating their expression. In the  
83 absence of MSK activity and IEG induction, the hypertrophic response is suppressed.  
84 Together, these studies provide new mechanistic insights into hypertrophic gene  
85 regulation and highlight the role of signalling to the epigenome in cardiac hypertrophy.

86

87

88

89

90

91

92

## 93 **Introduction**

94 Cardiovascular diseases (CVDs) are the leading cause of mortality and morbidity  
95 worldwide (Savarese and Lund, 2017). While cardiac hypertrophy is initially an  
96 adaptive response to increased workload or stress that enables cardiac function to  
97 meet the changing needs of the organism, when induced by pathological cues such as  
98 aortic stenosis, prolonged hypertension or myocardial infarction, over time, the  
99 response can decompensate resulting in a decline in cardiac function and progression  
100 to heart failure. At the cellular level, owing to their terminally differentiated status,  
101 hypertrophy of the cardiac muscle is mediated by growth of existing cardiomyocytes  
102 and not through their proliferation (Alkass et al., 2015).

103 Signalling pathways activated downstream of G protein coupled receptors (GPCR),  
104 such as those liganded by endothelin-1 (ET-1) and angiotensin II play a fundamental  
105 role in the induction of pathological hypertrophic remodelling. Owing to their nodal  
106 position in pathways downstream of GPCR activation, Mitogen Activated Protein  
107 Kinases (MAPK) are of particular importance in induction of hypertrophic growth of  
108 cardiomyocytes (Auger-Messier et al., 2013; Liao et al., 2001). Indeed, MAPK  
109 signalling pathways affect pathological hypertrophic growth via regulation of protein  
110 synthesis, metabolism and gene transcription.

111 MAPKs fall into three major families which are categorised according to the terminal  
112 kinase in the pathway – the extracellular regulated kinases 1 and 2 (ERK1/2), p38  
113 MAPK and c-Jun N-terminal kinases 1 and two (JNK1/2) (Bueno et al., 2000).  
114 Involvement of all three limbs of this family of kinases has been demonstrated in  
115 regulating hypertrophic remodelling, the phenotypic outcome differs depending upon  
116 the relative activation of each family member (Garrington and Johnson, 1999; Heineke  
117 and Molkenin, 2006). For example, enhanced ERK signalling leads to concentric

118 cardiac hypertrophy with preserved cardiac function, whereas cardiomyocyte-specific  
119 increased activity of p38 and JNK results in cardiac fibrosis and ventricular dilation  
120 (Bueno et al., 2000; Iwaki et al., 1990).

121 During cardiac hypertrophy, MAPK pathways intervene in transcriptional regulation via  
122 phosphorylation-dependent modulation of transcription factors including NFAT, Elk,  
123 SRF and GATA4 (Sanna et al., 2005). Preceding expression of hypertrophic genes,  
124 ERK-dependent activation of an immediate early gene (IEG) response is observed in  
125 cardiomyocytes. Specifically, IEG expression is rapidly activated in cultured rat  
126 neonatal ventricular cardiomyocytes in response to stimulation with hypertrophic  
127 agonists, and in vivo following pressure overload (Archer et al., 2017; Iwaki et al., 1990;  
128 Izumo et al., 1988). This response is initiated through phosphorylation-dependent  
129 activation of the AP-1 family of transcription factors, which promote the induction of  
130 IEG expression within minutes of the initiating cue (Balmano and Cook, 1999; Gille et  
131 al., 1992; Karin et al., 1997). Proto-typical IEG include members of the FOS (c-FOS,  
132 FOSB, FRA-1 and FRA-2), Jun (JUNB, JUND and c-JUN) and activating transcription  
133 factor (ATF; ATFa, ATF2, LRF1/ATF3, ATF4 and B-ATF) families of basic-leucine  
134 zipper transcription factors (Eferl and Wagner, 2003). Heterodimers of Fos and Jun  
135 associate with ATFs to form the AP-1 transcription factor complex (Glover and  
136 Harrison, 1995). The actions of AP-1 transcription factors are also mediated via direct  
137 interactions with other transcription factors, many of which, including NFkB and NFAT  
138 are involved in collaborations in regulating gene expression in many non-cardiac  
139 systems (Chen et al., 1998; Torgerson et al., 1998; Yang et al., 2010). The AP-1  
140 complex is also involved in cardiac hypertrophic responses. This role is clearly  
141 illustrated in in vitro and in vivo experiments in which AP-1 activity is suppressed  
142 through expression of dominant negative JUN (DN-JUN; also known as TAM67) or of

143 the endogenous AP-1 inhibitor JUND (Hilfiker-Kleiner et al., 2006; Kim-Mitsuyama et  
144 al., 2006; Takeuchi et al.). Moreover, muscle-specific knockout of c-Jun results in a  
145 loss of the initial compensatory phase of the pathological hypertrophic response and a  
146 progression to cardiac dilation, indicating a requirement for c-Jun in the initial phase of  
147 the cardiac hypertrophic response (Tachibana et al., 2006; Windak et al., 2013). Taken  
148 together, these results indicate that despite certain specific roles for different IEG, the  
149 AP-1 transcription factor complex fulfils important and complex functions in  
150 hypertrophic remodelling.

151 Although ERK activation and IEG induction in cardiomyocytes are highly correlated,  
152 the mechanism by which these events are coupled during induction of cardiomyocyte  
153 hypertrophy is not resolved. In other systems, MAPK activation leads to a nucleosomal  
154 response at IEG loci that involves phosphorylation and acetylation of serine and lysine  
155 residues respectively in the histone H3 NH<sub>2</sub>-terminal tail (Clayton et al., 2000; Dyson  
156 et al., 2005). Phosphorylated histone H3 in turn recruits scaffolding proteins such as  
157 14-3-3 family members, downstream transcriptional regulators and chromatin  
158 remodelling factors to bring about gene expression changes. The absence of a  
159 consensus site for ERK1/2 phosphorylation in the NH<sub>2</sub>-terminus of histone H3 would  
160 suggest that its phosphorylation is not directly via ERK1/2 but a downstream kinase. A  
161 candidate for this activity is the family of nuclear-localised mitogen and stress activated  
162 kinases (MSK1/2), which have been reported to mediate histone H3 phosphorylation  
163 (Duncan et al., 2006; Soloaga et al., 2003a). MSKs are nuclear-localised kinases  
164 comprising N- and C-terminal kinase domains separated by a flexible linker peptide.  
165 After an initial phosphorylation event by upstream MAPK including ERK1/2, MSKs  
166 undergo autophosphorylation, leading to full activation (Malakhova et al., 2009; McCoy  
167 et al., 2005). A potential role for MSK in cardiac remodelling is also reported.

168 Specifically, MSK1 and the highly homologous kinase MSK2 are both expressed in the  
169 heart and are activated in response to hypertrophic stimuli (Deak et al., 1998a; Markou  
170 et al., 2004, 2009). A requirement for MSK in the induction of the hypertrophic response  
171 has also been proposed to involve downstream activation of the histone  
172 acetyltransferase cAMP binding protein (CREB) (Markou et al., 2009). The nanomolar  
173 efficacy of the Ro318220 compound for MSK targets RSK2, PKC isoforms and S6  
174 kinase used in the aforementioned study may preclude the drawing of this conclusion  
175 (Bain et al., 2007). Moreover, the contribution of the nucleosomal response, which in  
176 other cell types appears to be central to the action of MSK and the induction of IEG  
177 expression, was not examined.

178 Here, we determined that MSK1/2 activated downstream of ERK1/2 promoted the  
179 phosphorylation of histone H3 S28 (pH3S28), which in turn recruits AP-1 factors, c-  
180 FOS and c-JUN along with the chromatin remodeller BRG-1 to IEG promoters,  
181 inducing transcription. Moreover, and supporting the physiological importance of this  
182 pathway, MSK was required for the hypertrophic response both *in vitro* and *in vivo*.  
183 Further, the ERK1/2-MSK1/2-pH3S28 molecular axis was conserved in human.

184 Together our data identify a key and missing component in the signalling pathway that  
185 transduces the activation of GPCRs by pathological pro-hypertrophic mediators in  
186 cardiomyocytes to the induction of hypertrophic remodelling.

187

188

189

190



191 **Results**

192 **ERK1/2 activity is required for the induction of cardiomyocyte hypertrophic gene**  
193 **expression by ET-1 in vitro.**

194 MAPK signalling pathways, IEG induction and AP-1 transcription factor engagement  
195 contribute to the hypertrophic remodelling of cardiomyocytes (Archer et al., 2017). To  
196 examine the mechanisms underlying induction of IEG expression, the signalling  
197 pathways involved and their relationship to cellular hypertrophic responses were  
198 analysed in in vitro and in vivo models following acute exposure to established inducers  
199 of pathological hypertrophy.

200 Consistent with findings from our laboratory and elsewhere, brief exposure of neonatal  
201 rat ventricular myocytes (NRVMs) to the GPCR agonist endothelin-1 (ET-1) resulted  
202 in a classical hypertrophic response associated with increases mRNA levels of  
203 *Anf/Nppa* and *Bnp/Nppb*, in cell size and in the number of cells positive for perinuclear  
204 Anf protein (Figure 1A-C and S1A). Alongside this hypertrophic response, the  
205 expression of IEGs including *c-Fos* and *c-Jun*, was upregulated in ET-1 stimulated  
206 NRVMs (Archer et al., 2017) (Figure 1D, Figure S1B). These effects of ET-1 on both  
207 induction of hypertrophy and IEGs were prevented by inhibition of the MAPK pathway  
208 with PD184352 (PD, an inhibitor of the direct upstream kinase of ERK1/2, MEK1/2;  
209 Figure S1C) (Archer et al., 2017; Heineke and Molkentin, 2006) (Figure 1A-D). The  
210 efficacy of PD in preventing ERK1/2 activation (and hence MAPK pathway activation)  
211 was confirmed by immunoblotting, which showed a loss of the phosphorylated active  
212 form of ERK, pERK1/2, which was elevated in ET-1 stimulated NRVMs (Figure S1D).  
213 Baseline pERK1/2 in non-stimulated cells was also decreased following PD (Figure  
214 S1D).

215 Consistent with the role of MAPK signalling to AP-1 in hypertrophy induction, a MAPK-  
216 dependent increase in activity of a luciferase-based AP-1 reporter was observed in ET-  
217 1 stimulated NRVMs (Figure 1E). Further, inhibition of AP-1 activity by adenoviral-  
218 mediated expression of dominant negative Jun (DN-Jun) abrogated the ET-1  
219 stimulated increases in cell surface area and *Nppa* mRNA (Figure 1F-G).

220 Together, these data confirm that a pathway involving ERK1/2, IEG induction and AP-  
221 1 activity is engaged and required for the immediate early hypertrophic response to  
222 ET-1.

223

224 **Endothelin-1 stimulates ERK-dependent phosphorylation of Histone H3 Serine**  
225 **28 specifically.**

226 The nucleosomal response – a term coined to link histone phosphorylation and IEG  
227 induction - is reported to be indissociable from ERK1/2 activity in a number of cell  
228 contexts. We therefore determined whether this nucleosomal response was engaged  
229 during ET-1 stimulated IEG induction in NRVM. Levels of histone H3 phosphorylated  
230 at Ser 10 and Ser 28 (pH3S10 and pH3S28) were quantified in histones acid-extracted  
231 from NRVMs exposed to ET-1. Consistent with the time-course of *c-Fos* induction, ET-  
232 1 promoted a significant increase in H3S28 phosphorylation at 10 min, which was not  
233 increased further at 30 min post ET-1 application (Figure 2A). Notably, the ET-1-  
234 stimulated increase in H3S28 phosphorylation was ERK pathway dependent, as  
235 shown by the loss of the response to ET-1 in cells treated with PD (Figure 2A). Neither  
236 ET-1 nor PD significantly affected H3S10 phosphorylation (Figure 2A).

237 The stimulation of H3S28 phosphorylation by hypertrophic agonists was next  
238 measured in vivo. To this end, cardiomyocyte H3S28 phosphorylation was analysed in

239 adult rats subsequent to 15 min infusion with sub-pressor levels of ET-1 via the jugular  
240 vein (Archer et al., 2017; Beyer et al., 1994; Dyson et al., 2005). Responses to the  
241 synthetic  $\beta$ -adrenergic agonist isoproterenol (Iso), which is often used chronically to  
242 induce pathological cardiac remodelling was also determined (Boluyt et al., 1995; Liu  
243 et al., 2009). Both ET-1 and Iso induced a significant increase in pH3S28 in  
244 cardiomyocyte nuclei (demarcated by Pcm-1 staining) in heart sections from rats  
245 infused with ET-1 and Iso (Figure 2B). Concurrent with increased pH3S28 in this in  
246 vivo model, mRNA expression of IEGs was induced following 15 min stimulation  
247 (Figure 2C and S2A). Supporting the pro-hypertrophic effect of these infusions with  
248 ET-1 or Iso, expression of the classic hypertrophy-associated foetal gene programme,  
249 including *Nppa/Anf* and *Nppb/Bnp* was also induced in these animals (Figure S2B).

250 To probe whether IEG promoters were phosphorylated at histone H3 during this  
251 intervention, chromatin immunoprecipitation (ChIP) experiments were performed.  
252 Chromatin was precipitated using antibodies against phosphorylated H3S28 and  
253 product detected by qPCR using primer pairs targeting the *c-Jun* and *c-Fos* promoters,  
254 as shown in the cartoons (Figure 2D). Notably, consistent with the increase in  
255 phosphorylated H3S28 detected by immunoblotting and immunofluorescence staining  
256 of bulk histones, ChIP enrichment for pH3S28-associated IEG promoters was  
257 substantially increased following 15 min ET-1 or Iso infusion (Figure 2D).

258

259 **MSK1/2 is activated following ET-1 stimulation in an ERK1/2 dependent manner**  
260 **and is required for IEG expression**

261 Although ERK activation is required for ET-1 dependent phosphorylation of histone H3  
262 at S28, the absence of consensus sequences for its phosphorylation of H3 would  
263 suggest that it is not the responsible histone-kinase. Rather, ERK activates a

264 downstream effector kinase that in turn phosphorylates histone H3. A candidate for  
265 this action is the mitogen and stress-activated kinase (MSK1/2), which has been shown  
266 in other tissue contexts to phosphorylate H3S28 (Soloaga et al., 2003a). While MSK1/2  
267 activation following hypertrophic stimulation is reported in cardiomyocytes, it has not  
268 been shown to play a role in histone phosphorylation and IEG induction. To establish  
269 whether MSK1/2 was engaged during ET-1 stimulation of cardiomyocytes and whether  
270 ERK activity was involved, levels of MSK1 phosphorylated at S376, a phosphorylation  
271 event required for activity, were analysed by immunoblotting of lysates prepared from  
272 NRVM stimulated with ET-1-stimulated  $\pm$  PD (Figure 3A). As shown in the immunoblot  
273 and accompanying densitometric analysis, ET-1 stimulated an increase in pMSK that  
274 was sensitive to MEK/ERK pathway inhibition with PD (Figure 3A). Importantly, using  
275 the in vivo model described earlier, an increase in pMSK was also detected in  
276 cardiomyocyte nuclei in heart sections from rats infused with ET-1 or Iso for 15 min  
277 (Figure 3B). Together, these experiments indicated that hypertrophic agonists  
278 stimulate a rapid phosphorylation of MSK in cardiomyocytes that is dependent on  
279 activation of MEK/ERK signalling.

280 Experiments were next conducted to investigate the functional role of MSK in the  
281 nucleosomal response to ET-1 in cardiomyocytes. Owing to the lack of availability of  
282 specific and sensitive pharmacological agents targeting MSK1/2, a molecular  
283 approach was adopted to manipulate its activity (Bain et al., 2007). To this end,  
284 adenoviruses were first employed. MSK1 signalling was enhanced through  
285 overexpression of wild-type MSK1 (WT-MSK), whilst endogenous MSK1 was inhibited  
286 by expression of a D565A kinase dead mutant of MSK1 that acts in a dominant–  
287 negative fashion (DN-MSK1) (Deak et al., 1998a). Owing to shared regulatory  
288 mechanisms of MSK1 and MSK2, DN-MSK1 would be expected to inhibit activity of

289 both kinases, overcoming possible redundancy (Zhong et al., 2001).  
290 Immunofluorescence analysis demonstrated that adenovirally-expressed FLAG-  
291 tagged WT- and DN-MSK1 were both localised to the nucleus in NRVMs (Figure 3C).  
292 Overexpression of the WT and DN-MSK1 proteins at equivalent levels was confirmed  
293 by immunoblotting using an antibody directed against their NH<sub>2</sub>-terminal FLAG epitope  
294 (Figure 3D). Overexpression of WT-MSK1 produced an increase in baseline MSK1  
295 phosphorylation whilst DN-MSK1 prevented the activation of endogenous MSK1 in  
296 response to ET-1, consistent with a dominant negative effect (Figure 3D). Neither  
297 overexpression of WT-MSK1 or DN-MSK1 affected ERK1/2 activation by ET-1,  
298 indicating that effects of these strategies to modify MSK activity are not mediated via  
299 altered ERK1/2 activity but by MSK1 itself (Figure 3D). The consequences of WT and  
300 DN-MSK1 expression on ET-1 stimulated histone H3S28 phosphorylation were next  
301 measured. Notably, both ET-1 and overexpression of WT-MSK1 elevated levels of  
302 pH3S28 in NRVMs, whereas expression of DN-MSK1 prevented the ET-1 stimulated  
303 increase in pH3S28 (Figure 3E), thereby demonstrating the requirement for MSK  
304 activity for H3S28 phosphorylation during the hypertrophic response to ET-1.

305 Whether the effect of WT and DN-MSK on MSK activation in ET-1 stimulated NRVM  
306 translated to an effect on IEG induction and hypertrophic responses was next  
307 examined (Figure 3F-G). NRVM expressing WT-MSK expression exhibited a  
308 significant elevation in *c-Fos* expression compared to control, which was not increased  
309 further by 10 min exposure to ET-1 (Figure 3F). Consistent with its effects on kinase  
310 activation and H3S28 phosphorylation, DN-MSK1 expression significantly inhibited ET-  
311 1 stimulated *c-Fos* induction. WT-MSK expression also had a significant effect on cell  
312 hypertrophy, stimulating an increase in cell area in the absence of ET-1 (Figure 3G).  
313 WT-MSK1 did not promote a significant increase in *Nppa* mRNA. Notably DN-MSK1

314 expression suppressed hypertrophic responses in NRVM exposed to ET-1 for 24 h,  
315 with a significant inhibition of the ET-1 stimulated increases in *Nppa* mRNA and in cell  
316 size observed when compared to controls (Figure 3G). Further supporting the role of  
317 MSK in histone H3 S28 phosphorylation, IEG induction and hypertrophy, abrogation of  
318 ET-1 stimulated increases in H3S28 phosphorylation, *c-Fos* and *Nppa* mRNA  
319 expression were also observed in ARVM (Figure S3A-C).

320 Having validated that suppression of MSK activity via DN-MSK1 expression could  
321 prevent ET-1 stimulated phosphorylation of histone H3S28, *c-Fos* induction and  
322 hypertrophic responses, we next probed the requirement for MSK for ET-1 stimulated  
323 phosphorylation of H3S28 at IEG promoters. To this end, ChIP experiments were  
324 carried out in NRVMs expressing DN-MSK1 or empty vector control that were exposed  
325 to ET-1 or vehicle for 10 min. Importantly, DN-MSK1 prevented the ET-1-stimulated  
326 increase in pH3S28 specifically at IEG promoters (Figure 3H). In these experiments,  
327 the ET-1 stimulated ChIP enrichment of *c-Jun* and *c-Fos* promoters was lost in NRVM  
328 overexpressing DN-MSK1 (Figure 3H).

329 To complement the experiments using DN-MSK, the requirement of MSK activity for  
330 ET-1 induction of *c-Fos*, *Msk1* mRNA expression was tested by knocking down its  
331 expression using small interfering RNA (siRNA). Using this approach, ~60 % reduction  
332 in *Msk1* mRNA was achieved compared to NRVM transfected with scrambled control  
333 siRNA (Figure S3C). In *Msk1* siRNA knockdown (siMsk1) NRVMs, ET-1 stimulated  
334 induction of *c-Fos* was significantly blunted after 10 min exposure (Figure S3D).  
335 Moreover, siMsk1 prevented ET-1 stimulated induction of hypertrophic gene  
336 expression (Figure S3E).

337 Together, these data generated using siRNAs and adenoviruses to manipulate both  
338 MSK activity and expression not only indicate that H3S28 is a substrate for MSK1 but

339 also that MSK1 is the kinase responsible for the phosphorylation of H3S28 and  
340 induction of *c-Fos* expression in cardiomyocytes stimulated with ET-1. Moreover, our  
341 data shows that these events are required for the hypertrophic response of  
342 cardiomyocytes.

343

344 **MSK1-mediated phosphorylation of H3S28 recruits BRG1, a component of the**  
345 **SWI/SNF family of chromatin remodelers to IEG loci**

346 Previous studies have reported a requirement for the BRG1 (encoded by gene  
347 *SMARCA4*) component of the BAF (BRG1/BRM-associated factor 60; BAF60) ATP-  
348 dependent SWI/SNF chromatin remodelling complex in induction of IEG expression  
349 and Myh isoform switching in pathological cardiac remodelling (Deak et al., 1998b;  
350 Hang et al., 2010). The role of Brg1 in IEG induction and hypertrophic remodelling was  
351 therefore tested. Consistent with previous studies, knock down of Brg1 with siRNA  
352 prevented isoform switching between *Myh6* and *Myh7*, associated with induction of  
353 pathological hypertrophy, and abrogated *c-Fos* induction in ET-1 stimulated NRVMs  
354 (Figure S3F-G). Having shown the involvement of Brg1 in ET-1 responses in NRVM,  
355 whether phosphorylation of H3S28 affected Brg1 occupancy at IEG promoters was  
356 next investigated. To this end, ChIP experiments were performed on NRVMs  
357 expressing DN-MSK1 ± ET-1, as in Figure 3H but using an antibody directed Brg1.  
358 Notably, as shown by greater ChIP enrichment, ET-1 stimulated increases in  
359 association of Brg1 with both the *c-Jun* and *c-Fos* promoters in NRVMs (Figure 3I).  
360 Brg1 recruitment was however prevented in DN-MSK expressing NRVMs. Further  
361 supporting these in vitro data, Brg1 was also enriched at the *c-Jun* and *c-Fos*  
362 promoters in chromatin prepared from hearts from Wistar rats infused with ET-1 or Iso  
363 for 15 min (Figure 3J).



364 Collectively, these data demonstrate that MSK-mediated phosphorylation of histone  
365 H3S28 at the promoter regions of IEGs is a necessary event for the recruitment of the  
366 chromatin remodelling complex to these promoters required for IEG expression and  
367 hypertrophic remodelling subsequent to GPCR stimulation.

368

369 **MSK1/2 expression is required for the hypertrophic response in vivo.**

370 The data above indicate a role for MSK in the induction of hypertrophic responses in  
371 vitro and that the MSK/pH3S28/Brg1/IEG pathway is acutely engaged following  
372 neurohumoral stimulation in vivo. The requirement for MSK1/2 for activation of this  
373 pathway and induction of hypertrophy was next examined in vivo using a mouse model  
374 in which both alleles of *Msk* had been deleted by homologous recombination (*Msk1/2*  
375 *<sup>-/-</sup>*; *Msk* KO) (Wiggin et al., 2002a). Specifically, wild type (WT) and *Msk* knockout  
376 (KO) mice were subjected to osmotic mini-pump infusion of Iso for one week, after  
377 which the activation of the MSK pathway and hypertrophy induction was measured.  
378 During this one week infusion, the initial adaptive remodelling associated with  
379 pathological hypertrophy would be expected.

380 The activation of the MSK/pH3S28/Brg1/IEG pathway axis during the one week Iso  
381 infusion and how it was affected by loss of *Msk1/2* was first assessed. As expected for  
382 the *Msk* KO mice, *Msk1* and *Msk2* transcripts were absent in heart tissue in this mouse  
383 (Figure 4A). *Msk1* and *Msk2* mRNA levels were also measured in the iso infused WT  
384 mice and found to be significantly upregulated after 1 week (Figure 4A). Notably, Iso-  
385 infused WT mice exhibited significant increases in expression of IEGs including *c-Fos*  
386 and *c-Jun* and in line with its role in IEG induction of *Smarca4* (the gene encoding  
387 Brg1) (Figure 4B-C). Consistent with the importance of MSK1/2 in the IEG response,



388 Iso induction of *c-Fos*, *c-Jun* and *Smarca4* expression was reduced in these mice when  
389 compared to similarly treated WT controls (Figure 4B-C). Levels of nuclear pMSK and  
390 pH3S28 (demarcated by Pcm-1 or Nesprin perinuclear staining (Thienpont et al., 2017)  
391 in cardiomyocytes in sections prepared from Iso-infused WT and KO animals were also  
392 significantly lower in KO animals than WT at baseline and were not affected by Iso,  
393 indicating inactivation of the MSK/pH3S28 pathway (Figure 4D-E). While significantly  
394 higher than in KO at baseline, no significant effect of Iso on pMSK or pH3S28 was  
395 however observed in WT cardiomyocytes.

396 We tested whether upregulation of IEGs, *Smarca4* and *Msk1/2* was a feature of other  
397 models of hypertrophic remodelling. In line with these findings in Iso infused mice, an  
398 upregulation of IEGs, *Smarca4* and of *Msk1/2* was detected in cardiomyocytes from  
399 rats subjected to constriction of the ascending aorta (AB) for 6 weeks (a model of  
400 pathological hypertrophy) (Thienpont et al., 2017) (Figure S4A). Indicative of a specific  
401 role of this IEG response to pathological cardiac remodelling, no such upregulation  
402 was detected in cardiomyocytes from rats subjected to treadmill training for 6 weeks,  
403 which exhibited physiological cardiac remodelling, with a similar degree of hypertrophy  
404 as the AB rats (Thienpont et al., 2017) (Figure S4A). *Msk1* and 2 mRNA levels were  
405 also increased in NRVMs after 24 h of ET-1 stimulation (Figure S4B).

406 Having confirmed the engagement of the MSK/pH3S28/Brg1/IEG pathway in Iso-  
407 infused mice, and the requirement for MSK1/2 for phosphorylation of H3S28 and  
408 induction of IEG, hypertrophic remodelling was assessed in these animals. Cardiac  
409 function and geometry was measured in vivo by 2D echocardiography prior to the start  
410 of the experiment (baseline) and after one week of Iso infusion. In line with the reported  
411 lack of an overt phenotype in *Msk* double KO mice, no differences in cardiac function,  
412 indicated by fractional shortening (FS) or of posterior wall thickness (PWd) were

413 detected between control WT and KO animals at baseline (Figure 4F and S4C).  
414 Following one week Iso infusion, whereas control mice exhibited significant increases  
415 in PWd and FS, typical of the initial stages of pathological hypertrophic remodelling  
416 (Selvetella et al., 2004), these responses to Iso were absent in *Msk* KO mice (Figure  
417 4F-G and S4C).

418 The hypertrophic response to Iso infusion was also assessed by RT-qPCR analysis of  
419 components of the foetal gene program. As would be expected, Iso infusion resulted  
420 in increased expression of *Nppa*, *Nppb* and *Myh7* in WT mice (Figure 4H). The  
421 expression of these hypertrophic markers was not however induced following Iso  
422 infusion in *Msk* KO mice, thereby supporting the requirement for Msk for the  
423 hypertrophic response observed in vitro.

424 Fibrosis is a feature of pathological hypertrophy, including following Iso infusion that  
425 contributes to disease progression. Histological analysis of LV tissue sections revealed  
426 a significant increase in interstitial fibrosis following Iso infusion in control mice that  
427 was absent in the *Msk* KO mice (Figure 4I and S4D). Supporting the histology analysis,  
428 *Col1a1* mRNA was substantially increased in Iso infused WT mice that was absent in  
429 similarly treated *Msk* KO mice (Figure 4J).

430 Fibrosis is a natural response to increased cardiomyocyte death in the myocardium.  
431 Given the association between cardiomyocyte viability and the activity of MAPK  
432 pathways, we assessed whether reduced cell death was contributing to the protective  
433 effects of *Msk* KO. TUNEL staining of heart sections revealed a significant Iso-  
434 dependent increase in cell death in WT mouse hearts that was not observed in *Msk*  
435 KO mice (Figure S4E). Baseline cell death was similar between WT and *Msk* KO  
436 mouse hearts. The expression of key anti- and pro-apoptotic mediators was analysed

437 (Figure S4F and G). Expression of executioner caspases 3 and 9 (*Casp3* and *Casp9*)  
438 of apoptosis and of *Bax*, a pro-apoptotic BH3 only family member, were increased  
439 following Iso in WT mice, whereas their expression was not induced in the *Msk* KO  
440 mouse (Figure S4F). Notably, *Bcl2*, which exhibits anti-apoptotic activity, was  
441 increased in the *Msk* KO mouse following Iso infusion (Figure S4G).

442 Together these data show that consistent with that observed in vitro, MSK activity is  
443 required for the induction of hypertrophy in vivo, and that in its absence, hearts are  
444 protected from pathological insult.

445

#### 446 **The MSK1/2/pH3S28/BRG1/IEG axis is engaged in human hypertrophic** 447 **remodelling**

448 Having shown an important role of MSK1/2 in IEG and hypertrophy induction in cellular  
449 models and in vivo in rodents, we analysed whether the MSK1/2/pH3S28/IEG axis was  
450 conserved in GPCR responses and hypertrophic remodelling in human. To this end,  
451 the activation of MSK and phosphorylation of H3S28 following application ET-1 and  
452 Iso was first analysed in acutely isolated ventricular cardiomyocytes from explanted  
453 non-failing donor hearts. The involvement of MAPK activity was also tested.  
454 Stimulation of human cardiomyocytes resulted in a significant increase in levels of  
455 pMSK and pH3S28 (Figure 5A-B). Consistent with our findings in rat ventricular  
456 cardiomyocytes, these phosphorylation events were abrogated by inhibition of the  
457 ERK1/2 pathway with PD.

458 To gain insight into the involvement of MSK and IEG in human disease, the expression  
459 of MSK1/2, IEGs and early response gene target *SMARCA4* was compared between  
460 cardiomyocyte nuclei purified from healthy and hypertrophic human hearts. As in

461 rodents, expression of MSK1/2, IEG components of the AP-1 transcription factor and  
462 SMARCA4 were substantially upregulated in hypertrophic cardiomyocytes (Figure 5C-  
463 E). We next analysed pH3S28 in the promoters of *c-FOS*, *C-JUN* and *SMARCA4* by  
464 ChIP. Notably, pH3S28 enrichment was observed at all three promoters in  
465 hypertrophic compared with healthy control hearts (Figure 5F-G).

466 Together, these data show conservation of the MSK pathway to IEG induction in  
467 human hearts and support our hypothesis that the MSK/pH3S28/IEG pathway is  
468 necessary to bring about the initial stages of the pathological hypertrophic response in  
469 cardiomyocytes (Figure 6).

470

## 471 **Discussion**

472 MAPK regulation of immediate early gene activity and expression is key to stress-  
473 mediated induction of cardiac hypertrophic responses. Here we identified MSK1/2, a  
474 kinase activated downstream of ERK1/2, as being necessary for the initiation of IEG  
475 expression in response to pathological hypertrophic cues. MSK1/2 elicited this  
476 response through phosphorylation of histone 3 at Ser 28 allowing recruitment of the  
477 ATP-dependent chromatin remodeller, Brg1. In the absence of this response,  
478 hypertrophic gene expression and cardiac remodelling was attenuated. Notably, live-  
479 cell functional assays and analysis of post-mortem human hypertrophic hearts  
480 revealed that this pathway was conserved in humans. These data are summarised in  
481 the cartoon in Figure 6.

482 The hypertrophic response of the pathologically stressed myocardium is mediated  
483 through an extensive remodelling of the cardiomyocyte transcriptome (Selvetella et al.,  
484 2004; Song et al., 2012). Contributing to the initiation of this process as well as being  
485 required for its manifestation are AP-1 transcription factors, that comprise

486 heterodimers of, but not restricted to, the proto-typical IEGs c-FOS and c-JUN (Chiu et  
487 al., 1988; Hess et al., 2004). Through their signal responsive phosphorylation, AP-1  
488 are acutely activated in response to hypertrophic stimuli and upon phosphorylation  
489 associate with cognate response elements in the promoters of their encoding genes  
490 as well as numerous other targets, thereby promoting a rapid induction of their  
491 expression. Consistent with previous work from our laboratory and others and this  
492 established paradigm for AP-1 activity in the heart, we show here that the expression  
493 of these IEGs is increased within minutes of exposure of cells to hypertrophic agonists,  
494 both in vitro, and importantly in vivo (Archer et al., 2017). As revealed by use of  
495 dominant negative AP-1 components shown here and in previous studies, the  
496 induction of these early response genes, which include many transcription factors, is  
497 important in mediating later phases of the hypertrophic response (Hilfiker-Kleiner et al.,  
498 2006; Petrich et al., 2003).

499

## 500 **ERK1/2 in the heart**

501 Activation of the ERK1/2 MAPK pathways is a conserved feature of many hypertrophic  
502 stressors. This signalling cascade is activated following receptor engagement at the  
503 plasma membrane and culminates in induction of hypertrophic gene expression. As  
504 we show here and described elsewhere, expression of immediate early genes occurs  
505 in vitro and in vivo within minutes of exposure to hypertrophic agonist, and is the first  
506 transcriptional readout of MAPK activation. Indeed, we show that ERK1/2 activation  
507 mirrors the temporal profile of IEG induction. Moreover, in the absence of ERK activity,  
508 hormone stimulated AP-1 activation, IEG induction and expression of markers of  
509 hypertrophy in myocyte cultures is prevented in vitro and in vivo (Liu et al., 2016).

510 Notably, while ERK and IEG activity peak proximal to the initiating stimulus, despite a  
511 lack of detectable activity subsequent to this peak, ERK inhibition prevents  
512 hypertrophic gene expression (Archer et al., 2017).

513 While we, as others, show an involvement of ERK1/2 and activation of IEGs in the  
514 mechanism underlying pathological hypertrophic remodelling, the role of ERK1/2 in  
515 hypertrophy in vivo is complex. Whereas in vivo overexpression of ERKs is not  
516 sufficient to induce a hypertrophic response, overexpression of its direct upstream  
517 kinase MEK induces a concentric hypertrophic response (Mutlak and Kehat, 2015).  
518 However, overexpression of the small GTPase protein Ras, which lies between GPCR  
519 activation and ERK activation, results in cardiomyopathy (Wu Guangyu et al., 2001).  
520 Recent elegant strategies involving conditional or tissue specific manipulation of each  
521 isoform to overcome embryonic lethality of the genetic KO now provide a clearer view  
522 of the contribution of this pathway to the cardiac hypertrophic response. Loss of ERK2,  
523 which represents 50-70 % of ERK activity in the heart attenuates the initial  
524 compensatory phase of the hypertrophic response and a direct progression to a  
525 cardiomyopathic phenotype. Significantly, this cardiomyopathic phase is associated  
526 with substantial cardiomyocyte death, which would indicate that ERK2 elicits a  
527 protective anti-apoptotic effect upon the cardiomyocyte. While initial reports suggested  
528 no impact of *Erk1/2* cardiac KO (ERK1<sup>-/-</sup>ERK2<sup>+/-</sup>) on stress-induced cardiac growth, a  
529 later study demonstrated that this intervention, along with cardiac-restricted  
530 overexpression activated MEK1, resulted in a switch from concentric to eccentric  
531 (lengthening) cardiomyocyte growth (Bueno et al., 2000; Purcell et al., 2007). Ablation  
532 of ERK1/2 signalling in the heart by cardiac-specific transgenic mice overexpressing  
533 DUSP6 present with a predisposition to developing a dilatory phenotype and increased  
534 cardiomyocyte apoptosis (Purcell et al., 2007). Surprisingly, cardiomyocyte-specific

535 loss of *Erk2* in mice did not affect physiological cardiac remodelling in response to 4  
536 weeks of swimming training, indicating independent pathways for adaptive hypertrophy  
537 in response to pathological or physiological stimuli (Ulm et al., 2014).

538 These diverse data from these different experimental models are perhaps not  
539 surprising given the complex regulation of this pathway, involving feedback at multiple  
540 levels that act to prevent constitutive activity. Together, these experimental findings  
541 suggest that ERK signalling contributes to acute, adaptive hypertrophic growth while  
542 repressing maladaptive growth thereby protecting the heart from maladaptive  
543 remodelling and progression to failure. A similar role is also suggested of certain AP-1  
544 components where in their absence, the hypertrophic response is less adaptive in  
545 nature (Windak et al., 2013).

546

#### 547 **MSK in the heart**

548 As indicated above, ERK1/2 signalling is critical for transduction of hypertrophic cues  
549 to activation of IEG expression and induction of hypertrophy. Moreover, ERK1/2  
550 phosphorylates hypertrophy-related transcription factors to modulate the activation.  
551 Phosphorylation of histone H3 at S10 and S28 has also been described as key events  
552 in the pathway indissociably linking MAPK activation and induction of IEG expression  
553 in response to mitogenic stimulation (Clayton and Mahadevan, 2003; Clayton et al.,  
554 2000). MAPK cannot however directly phosphorylate H3S28 and S10 but act via an  
555 intermediate kinase, which in fibroblastic cells was identified as the mitogen and stress  
556 activated kinase MSK1/2. MSK1/2 are promiscuous nuclear serine/threonine proteins.  
557 MSK is activated either through ERK1/2 or p38 MAPK cascades, resulting in  
558 phosphorylation of the MSK C-terminal Ca<sup>2+</sup>/calmodulin-dependent protein kinase



559 (CaMK)-like domain, leading to a positive feed forward autophosphorylation event at  
560 the N-terminal AGC-like kinase domain (Roux and Blenis, 2004). The phosphorylated  
561 activated N-terminal domain then phosphorylates other substrates, including histone  
562 H3. Our study provides the first evidence for a role for MSK in promoter histone H3  
563 phosphorylation and IEG induction in cardiomyocytes. Although the necessity for IEG  
564 activation in the mitogenic stress response mediated through CREB and ATF has been  
565 described in cultured fibroblasts isolated from *Rsk2* or *Msk1/2* double KO mice  
566 (Soloaga et al., 2003b), the data presented here are the first demonstration that  
567 phosphorylation of H3S28 by MSK is required for IEG activation and mounting of the  
568 cardiomyocyte hypertrophic response. The specific role for MSK1/2 in responding to  
569 stress stimuli is consistent with the lack of overt phenotype in *Msk1/2* double KO mice  
570 (Wiggin et al., 2002b).

571 Histone H3 Ser 28 phosphorylation at IEG promoters is an important step in the  
572 induction of their expression. This phosphorylation event results in increased  
573 recruitment of BRG1, a component of the SWI/SNF remodelling complex to chromatin  
574 (Hang et al., 2010). Appropriate localisation of this complex to chromatin is likely a key  
575 step in bringing about the required transcriptional response. Notably, BRG1 is an  
576 important mediator of chromatin remodelling and transcriptional responses in cardiac  
577 development and disease. Indeed, BRG1 together with HDAC and PARP is recruited  
578 to the *Myh6/7* locus and is involved in bringing about the isoform switching of myosin  
579 heavy chain during cardiac maturation and in response to stress. The lack of Brg1  
580 recruitment following DN-MSK expression described here would support these  
581 previous observations. Based on our data, we propose that H3S28 phosphorylation by  
582 MSK is an initial step in mediating this hypertrophic response. The recruitment of BRG1  
583 further contributes to modulation of the epigenetic landscape of the heart through



584 recruiting factors including EZH2 to acetylate H3K27 at enhancers of the mesoderm  
585 and for Polycomb-mediated repression of non-mesodermal genes (Gehani et al.,  
586 2010). Such a role for MSK-mediated phosphorylation of H3S28 is described in  
587 neuronal differentiation, where MSK1/2 phosphorylates and targets H3S28 in  
588 promoters with Polycomb repressor complex 2 (PRC2) – bound methylated H3K27,  
589 thereby displacing PRC2 for gene activation (Gehani et al., 2010). H3K27me3 is also  
590 lost at activated gene promoters in hypertrophy and disease in cardiomyocytes  
591 (Gilsbach et al., 2014; Thienpont et al., 2017). Whether loss of this mark is associated  
592 with gain of H3S28 phosphorylation is not determined in cardiomyocyte transcriptional  
593 responses, although elsewhere, phosphorylation of H3S28 has been shown to  
594 displace the PRC complex allowing H3K27 acetylation (Kim et al., 2012). Together,  
595 these data suggest that MSK-mediated phosphorylation of H3S28 is important in  
596 bringing about epigenetic changes underlying cardiac development and in the  
597 responses to hypertrophic cues.

598 Phosphorylation of histone H3 has previously been described in cardiomyocytes, albeit  
599 in the context of a bona fide hypertrophic response. In chronic remodelling in response  
600 to sustained sympathetic activation, CaMKII was found to bind directly and  
601 phosphorylate H3S28. In end-stage heart failure as well as in a murine model, CaMKII-  
602 mediated H3S28 promoter activates at adult haemoglobin gene expression  
603 (Saadatmand et al., 2019). Whether this particular mechanism is protective or  
604 contributes to the pathological phenotype is undetermined. Importantly, CaMKII was  
605 found necessary for sustained elevation of global pH3S28, with major differences  
606 compared with control seen after 24 h catecholaminergic stimulation (Saadatmand et  
607 al., 2019). While CaMKII may indeed play a role at certain gene loci, the decrease in  
608 H3S28 phosphorylation in *Msk* KO animals, suggests that MSKs make an important

609 contribution to maintaining phosphorylation of H3S28, particularly at IEG loci shown  
610 here, during disease remodelling. CaMKII is also shown to phosphorylate H3S10  
611 leading to the induction of cardiac foetal genes (Awad et al., 2013). Notably, in the  
612 latter study, no CaMKII dependent phosphorylation of H3S28 was detected. The  
613 nuclear localisation of this kinase together with its identified role in HDAC  
614 phosphorylation provides a mechanism to remodel chromatin in a manner optimal for  
615 stimulation of MEF2-dependent gene expression during hypertrophic remodelling  
616 (Awad et al., 2013; Backs et al., 2006). CaMKII-associated pH3S10 is also sustained  
617 in end-stage heart failure (Awad et al., 2015). As we did not detect a robust change in  
618 H3S10 phosphorylation in NRVMs exposed to hypertrophic stimuli, we did not examine  
619 phosphorylation of this residue in disease in vivo. Together, CaMKII phosphorylation  
620 of H3S10 and H3S28 and H3S28 phosphorylation by MSK may underlie a mechanism  
621 that permits different stimuli at different phases of their action to selectively control the  
622 expression of discrete panels of target genes.

623 Consistent with studies elsewhere, we show that MSK lies downstream of ERK1/2,  
624 requiring ERK activity for function (Markou and Lazou, 2002) (Figure SB). MSK is also  
625 modified by p38 MAPK, which has been proposed to be required in addition for ERK1/2  
626 for activation and in mediating pathological cardiac stress responses. Further, MSK is  
627 proposed to induce hypertrophic responses via CREB in a manner that also requires  
628 PKA (Markou et al., 2004). These studies were however constrained by the poor  
629 pharmacology of MSK with drugs used targeting PKC and PKA in the nM range (Alessi,  
630 1997). Since in agreement with other studies, ERK inhibition was sufficient to prevent  
631 MSK activation and its regulation of effectors, we did not probe further the role of p38.  
632 Notably, as well as showing increased phosphorylation of sites indicative of its  
633 activation, *MSK1/2* gene expression was induced in response to hypertrophic

634 stimulation both in vitro and in vivo. *MSK1/2* expression was also maintained in more  
635 chronic situations, further underlining the importance of this kinase in early responses  
636 to stress as well as in potentially sustaining its function. The persistence of IEG  
637 expression in the 6 week rat model of hypertrophic remodelling and in human disease  
638 may support this notion.

639 Other targets of MSK involved in the cardiac hypertrophic response have been  
640 described. The first substrate of MSK identified was the cAMP-Responsive Element-  
641 Binding Protein (CREB) transcription factor, which binds cAMP response DNA  
642 elements (CRE), associating with the histone acetyltransferase CREB-binding protein  
643 (CBP/p300) to activate transcription. CREB itself is also phosphorylated by a number  
644 of different kinases, including protein kinase A (PKA) (Johannessen et al., 2004). The  
645 role of MSK-activated CREB in vivo is controversial. Several studies have  
646 demonstrated that PKA- but not MSK-mediated CREB phosphorylation leads to CBP  
647 or p300 recruitment (Kasper et al., 2011). Cardiac-specific expression of a dominant  
648 negative form of CREB (DN-CREB) leads to a dilated cardiomyopathy phenotype  
649 (Watson et al., 2010). Given the extreme phenotype of DN-CREB in contrast to the  
650 relatively benign *Msk1/2* double KO, it is likely that normal CREB activity is  
651 independent of MSK in the heart. Related to its role in the nucleosomal response, MSK  
652 phosphorylates high mobility group 14 protein (HMG-14). This protein associates with  
653 phosphorylated H3 at activated promoters (Soloaga et al., 2003b). Its role in chromatin  
654 remodelling remains elusive and its relationship with MSK and H3 phosphorylation  
655 remains however, to be determined (Phair and Misteli, 2000).

656

657 **Pharmacology of MSK for therapeutic targeting**

658 The lack of a significant cardiac phenotype of *Msk1/2* KO suggests a limited role of  
659 MSK in the basal activity of cardiomyocytes. The stress-specific function of MSK may  
660 endow it however with possessing the necessary qualities of being therapeutically  
661 targetable. To date, no highly specific drugs suitable for in vivo use are available and  
662 those that are show equivalent efficacy at other important kinases including PKC and  
663 PKA, the use of which would preclude identification of MSK mechanisms of action and  
664 role in the heart. Specific inhibitors of kinases upstream of MSK, including members of  
665 the ERK/MAPK pathway have also been employed. The role of these kinases in the  
666 baseline activity of the heart is more significant making them less ideal targets for  
667 therapy.

668

## 669 **Conclusion**

670 Our data identified MSK as the missing link between ERK/MAPK activation, histone  
671 H3S28 phosphorylation, IEG induction and cardiomyocyte hypertrophy induction.  
672 Further studies will lead to the identification of the wider significance of MSK-induced  
673 pH3S28 in the hypertrophic response and how it may be manipulated for therapeutic  
674 benefit.

675

## 676 **Materials and Methods**

### 677 **Reagents**

678 Chemicals purchased were from Sigma Aldrich and molecular biology reagents were  
679 from Thermo Scientific and Life Technologies, unless stated otherwise. Tables of

680 antibodies and primers used in this study are included in Supplementary Tables and 3  
681 and 4 respectively.

682

### 683 **Animal experiments**

684 All experiments involving animals were performed in accordance with the UK Home  
685 Office and institutional guidelines and in accordance with the European Directive  
686 2010/63/EU and approved by the Ethical Committee for Animal Experiments of the KU  
687 Leuven (Belgium). The Msk1/2 null animals have been previously described (Arthur  
688 and Cohen, 2000; Wiggin et al., 2002b). Hypertrophic remodelling was induced in 8-  
689 10 week old male mice animals by administration of isoproterenol (Iso, Sigma-Aldrich)  
690 at 10 mg/kg/day for one week via osmotic mini-pumps (Alzet) implantation as  
691 previously described (Liu et al., 2009). Jugular vein infusion of ET-1 and Iso was  
692 performed as previously described (Archer et al., 2017) using an approved  
693 experimental protocol (license number P055/2017) approved by the Ethical Committee  
694 for Animal Experiments of the KU Leuven (Belgium), explained in detail later. Male  
695 Sprague Dawley rats subjected to six weeks of ascending aortic banding or a six-week  
696 treadmill training program were previously used to generate cardiomyocyte-specific  
697 nuclear (PCM-1 positive) RNA-sequencing data as previously described (Thienpont et  
698 al., 2017). RNA sequencing data was re-purposed for this study, focusing on the panel  
699 of IEGs. The sequencing data are available in the NCBI's Gene Expression Omnibus  
700 (GEO) database (GEO GSE66653). Animals were housed and treated according to  
701 the European Directive 2010/63/EU.

702

### 703 **Echocardiography**

704 Mice were anesthetised with Avertin (200 mg/kg). Cardiac function was assessed by  
705 transthoracic 2D M-mode echocardiography using an Acuson Sequoia C256  
706 ultrasound system (Siemens) as previously described (Liu et al., 2009).

707

### 708 **Preparation of neonatal rat ventricular myocytes (NRVMs)**

709 Primary neonatal rat ventricular myocytes (NRVMs) were isolated from 3-4 day old  
710 male and female Wistar pups and cultured as described previously (Higazi et al., 2009).  
711 Cultures were > 95 % pure. NRVMs were seeded at a density at which they exhibited  
712 spontaneous and synchronous beating throughout the experiment. 48 h after seeding,  
713 NRVMs were washed into serum-free medium (DMEM/M199 4:1, 1 mM sodium  
714 pyruvate, 5.5 µg/mL transferrin, 5 ng/mL sodium selenite, 1 X Antibiotic-Antimycotic  
715 (Life Technologies), and 3 µM cytosine b-D-arabinofuranoside (araC) and serum-  
716 starved for 24 h. NRVMs were subsequently stimulated with the agents described.  
717 Adenoviral infections were performed by incubation with a volume of virus-containing  
718 serum-free medium sufficient to cover the cells for 4 h. Agonist treatments diluted in  
719 serum-free medium were applied 24 h post-infection with adenovirus. Endothelin-1  
720 (ET-1, Millipore), isoproterenol hydrochloride (Iso, Sigma Aldrich) and PD184352 (PD,  
721 Sigma Aldrich) treatments were performed at a final concentration of 100 nM, 10 nM  
722 and 10 nM respectively. All cellular treatments with PD were pre-treated with PD for  
723 30 min prior to hypertrophic agonist application (ET-1/Iso). Control cellular experiments  
724 (no treatment) were treated with the same volume of vehicle only (DMSO for ET-1 and  
725 PD).

726

727

## 728 **Isolation and culture of adult rat ventricular myocytes (ARVMs)**

729 Male Wistar rats (Harlan; ~200 g) were anaesthetised by CO<sub>2</sub> inhalation and killed by  
730 cervical dislocation. ARVMs were isolated by collagenase digestion following  
731 Langendorff perfusion as previously described and cultured in adult cardiomyocyte  
732 medium (M199, 1 % penicillin-streptomycin-l-glutamine, 0.2 % bovine serum albumin  
733 (BSA)) on laminin-coated (25 µg/ml) dishes (Drawnel et al., 2012). Adenoviral  
734 infections were performed for 12 h in a minimal volume of virus-containing medium.  
735 For experiments involving acute stimulation with ET-1 and Iso, cells in Tyrode were  
736 plated onto laminin-coated 8 well Nunc cover glasses cells, allowed to attach for 1 h at  
737 37 °C, after which the Tyrode solution was replaced with Tyrode containing DMSO  
738 vehicle or Tyrode containing 10 nM PD. After 20 min, buffer was exchanged for Tyrode  
739 containing 100 nM ET-1 or 10 nM Iso ± PD. After 15 min, dishes were placed on ice  
740 and processed for immunostaining and imaging.

741

## 742 **Isolation of human ventricular cardiomyocytes**

743 Donor human tissue was collected under a study protocol approved by the ethical  
744 committee of UZ Leuven (S58824), conformed to the Helsinki declaration, and was  
745 conducted in accordance with the prevailing national and European Union regulations  
746 on the use of human tissues. Donor information is displayed in Table S1.

747 Human ventricular myocytes were prepared from the explanted hearts immediately  
748 after removal as previously described (Dries et al., 2018). The explants hearts were  
749 collected in ice-cold modified Tyrode's solution at the time of surgery (in mM: NaCl  
750 130, KCl 27, HEPES 6, MgSO<sub>4</sub> 1.2, KH<sub>2</sub>PO<sub>4</sub> 1.2, glucose 50; pH 7.2 with NaOH) and  
751 transported to the lab. A wedge of the left ventricle with its perfusing coronary artery

752 was cannulated. If possible, a wedge from the left anterior descending artery was  
753 cannulated, otherwise a left circumflex branch was used. The artery and the tissue was  
754 perfused at 37 °C with a Ca<sup>2+</sup>-free Tyrode's solution (in mM: NaCl 130, KCl 5.4, HEPES  
755 6, MgSO<sub>4</sub> 1.2, KH<sub>2</sub>PO<sub>4</sub> 1.2, glucose 20; pH 7.2 with NaOH) for 30 min followed by  
756 enzyme perfusion for 40 min (collagenase A, Roche and protease XIV, Sigma Aldrich  
757 in Ca<sup>2+</sup>-free solution) and after digestion, perfused with low Ca<sup>2+</sup> Tyrode (Ca<sup>2+</sup>-free  
758 solution with 0.18 mM CaCl<sub>2</sub> added). The digested tissue was minced, the suspension  
759 was filtered and the isolated myocytes were resuspended in normal Tyrode. After  
760 isolation, the cells were allowed to recover for 1 h before starting experiments or  
761 fixation. For experiments involving stimulation with Iso or ET-1, cells were plated onto  
762 poly-L-lysine coated 8 well Nunc cover glasses and allowed to attach for 1 h at 37 °C.  
763 After this period the Tyrode solution was replaced with Tyrode containing DMSO  
764 vehicle or Tyrode containing 10 nM PD. After 20 min, buffer was exchanged for Tyrode  
765 containing 100 nM ET-1 or 10 nM Iso ± PD. After 15 min, dishes were placed on ice  
766 and processed for immunostaining and imaging.

767

## 768 **Isolation of human cardiomyocyte nuclei**

769 Nuclei from post-mortem left ventricular tissue were isolated and flow sorted according  
770 to pericentriolar material 1 (PCM-1) staining as previously described (Bergmann and  
771 Jovinge, 2012). 500,000 nuclei were sorted into 1 ml TRIzol reagent for RNase  
772 inhibition prior to RNA isolation. Human LV samples were obtained from the KI  
773 Donatum, Karolinska Institutet, Stockholm, Sweden, with permission for the analysis  
774 of human tissue for research purposes granted by the Regional Ethics Committee in  
775 Stockholm, Sweden. Donor information from which LV cardiomyocyte nuclei were  
776 isolated is displayed in Table S2.



777

## 778 **Histology and section preparation**

779 Adult hearts were dissected from *Msk1/2* KO mice and covered in a layer of Tissue-  
780 Tek optimum cutting temperature (OCT) in Tissue-Tek® Cryomold® Molds (15x15x15  
781 mm) and flash-frozen in liquid nitrogen-cooled isopentane (VWR). 10 µm ventricular  
782 sections were cut using a Leica cryostat and attached to SuperFrost Plus™ slides  
783 (VWR). Slides were frozen at -20 °C prior to immunostaining.

784 Sections were thawed and rehydrated in phosphate buffered saline (PBS) for 5 min,  
785 followed by 15 min fixation in 4 % paraformaldehyde (PFA). After three washes (5 min  
786 each) in PBS, sections were permeabilised for 30 min in 0.2 % Triton X-100 in PBS  
787 (PBS-TX), then washed twice with PBS. Non-specific protein binding sites were  
788 blocked by incubation in PBS-TX containing 3 % BSA or 5 % goat serum for 1 h.  
789 Primary antibodies were diluted in blocking buffer and incubated overnight at 4 °C. After  
790 overnight incubation, slides were washed X3 in PBS and secondary antibodies added  
791 in blocking buffer for 1 h at room temperature. After incubation, the slides were washed  
792 and mounted in VECTASHIELD Antifade Mounting Medium containing DAPI  
793 (Vectorlabs). Confocal images were acquired using a Nikon A1R confocal microscope  
794 using a 40X 1.3 Numerical Aperture (N.A.) oil immersion objective.

795

## 796 **Picro Sirius Red staining for fibrosis analysis**

797 10 µm thick sections were cut from OCT embedded tissue as above. Subsequently,  
798 sections were rehydrated and stained for collagen using a Picro Sirius red staining kit  
799 (PolySciences). After staining, sections were mounted in dibutylphthalate polystyrene  
800 xylene mounting medium. Images were acquired using a Zeiss Axioplan microscope

801 configured with an AxioCam Hrc camera. Polarization microscopy was performed on  
802 the Sirius red stained sections to visualize collagen type I and III based on the  
803 birefringence properties of collagen. The degree of fibrosis was quantified using  
804 Axiovision analysis software.

805

## 806 **Immunofluorescence analysis**

807 Analysis of surface area of NRVM was carried out as previously described (6). Briefly,  
808 NRVMs for immunofluorescence were cultured and fixed in black 96-well imaging  
809 microplates (BD Biosciences). NRVMs were immunostained with primary antibodies  
810 against  $\alpha$ -Act and ANF and detected using Alexa Fluor 488 and 568-coupled  
811 secondary antibodies (Table S3). After immunostaining, nuclei were labelled with  
812 Hoescht (1  $\mu$ g/ml in PBS for 20 min). Images were captured using a BD Pathway 855  
813 high-content imaging system and Attovision software. Cell planimetry was performed  
814 using ImageJ by drawing around the edge of the cells (NIH). At least 400 cells from  
815 three independent experiments were analysed. These images were also used for  
816 quantification of ANF protein expression as determined by counting the number of  
817 NRVM exhibiting a peri-nuclear ring of ANF.

818 For confocal imaging, NRVMs were cultured in 16-well chamber slides (Nunc). Slides  
819 were mounted onto a coverslip using VECTASHIELD Mounting Medium containing  
820 DAPI and sealed with clear nail varnish.

821 For staining of ARVMs and human isolated cardiomyocytes, cells were fixed and  
822 permeabilised in ice-cold 100 % methanol and incubated at -20 °C for 10 min. Methanol  
823 was washed from the coverslips twice with PBS and further permeabilisation  
824 performed by the addition of 0.5 ml ice-cold 100 % acetone and incubation at -20 °C

825 for 1 min. Following an additional two washes in PBS, antibody labelling was performed  
826 as described for NRVM. To further reduce background staining, blocking and  
827 secondary antibody buffers contained 1 % BSA in addition to goat serum.

828 Immunofluorescence analysis of cardiac sections was performed as previously  
829 described (8). Snap-frozen heart samples were embedded in OCT (VWR), cryo-  
830 sections (thickness 10  $\mu$ m) were collected on SUPERFROST PLUS microscope slides  
831 (VWR), fixed in 4 % PFA in PBS for 15 min, permeabilised in 0.25 % Triton-X100 in  
832 PBS for 15 min, and blocked in 5 % Chemibloc in PBS with 0.1 % Triton-X100 (PBS-  
833 TX) for 1 h. Sections were subsequently incubated overnight at 4°C in blocking buffer  
834 with primary antibodies as per Table S3. Samples were washed extensively in PBS-  
835 TX, and incubated with Alexa Fluor® secondary antibodies (Invitrogen) at 1:500 in  
836 PBS-TX for 1 h at room temperature. Where required, DAPI was included to identify  
837 the DNA in nuclei, respectively.

838 Sections were mounted in VECTASHIELD with DAPI (Vector Labs) and imaged on a  
839 Nikon A1R confocal microscope through a Plan Fluor DIC H N 40x oil immersion  
840 objective (N.A.=1.3). Image stacks were collected over a 2  $\mu$ m stack thickness (0.2  $\mu$ m  
841 z-step). Image stacks were analysed with Volocity Image analysis software (version  
842 6.2.1, Perkin Elmer). Cardiac myocyte nuclei were identified by PCM-1- or Nesprin-  
843 positive labelling, as previously described (Thienpont et al., 2017).

844 Cellular apoptosis was measured in *Msk* KO mouse cardiac sections using the TACS®  
845 2 TdT-DAB In Situ Apoptosis Detection Kit (Bio-Techne Ltd).

846 Confocal images were acquired using an Olympus FV1000 point scanning microscope  
847 attached to an Olympus IX81, equipped with a 40X/1.3 NA UPlanFI oil immersion

848 objective or using a Nikon A1R confocal attached to a Nikon Ti microscope equipped  
849 with 40X 1.3 N.A. oil immersion objective.

850

### 851 **Histone isolation by acid extraction**

852 NRVMs in 6-well dishes were washed once in ice-cold PBS. 0.5 ml of fresh ice-cold  
853 PBS was added to each well, the cells scraped and placed in pre-chilled 1.5 ml tubes.  
854 Cells were pelleted by centrifugation (10 min, 300 xg, 4 °C). PBS was removed and  
855 the pellet re-suspended in 1 ml hypotonic lysis buffer. The resuspended cells were  
856 incubated on a rotator at 4 °C, 30 rpm for 30 min. At the end of this incubation, intact  
857 nuclei were pelleted by centrifugation (10 min, 10000 xg, 4 °C). Nuclei were then  
858 resuspended in 400 µl 0.2 M H<sub>2</sub>SO<sub>4</sub> by pipetting and vortexing. Histones were acid  
859 extracted overnight at 4 °C on a rotator at 30 rpm. Following acid extraction, nuclear  
860 debris was removed by centrifugation (10 min, 16000 xg, 4 °C) and the supernatant  
861 containing isolated histones transferred to a pre-chilled tube. To precipitate proteins,  
862 100 % trichloroacetic acid was added to the supernatant in a drop-wise manner to  
863 achieve a final concentration of 25 %. The tube was gently inverted and then incubated  
864 on ice for 6 h. At the end of this period, precipitated proteins were recovered by  
865 centrifugation (10 min, 16000 xg, 4 °C). The supernatant was aspirated and acid  
866 removed from the tube by washing the pellet in 300 µl ice-cold acetone. After  
867 centrifugation (5 min, 16000 xg, 4 °C) and removal of the supernatant, the acetone  
868 wash and spin were repeated. Finally, the supernatant was gently removed and the  
869 pellet air-dried for 20 min at room temperature. The dried pellet was resuspended in  
870 50 µl water and incubated overnight at 4 °C on a rotator at 30 rpm to maximise protein  
871 solubilisation.

872

### 873 **Immunoblot analysis**

874 Cultures of NRVM were washed once in ice-cold PBS after which 80  $\mu$ l pre-chilled  
875 RIPA buffer was added to the dish and incubated for 5 min on ice (25 mM Tris-HCl, pH  
876 7.6, 150 mM NaCl, 0.1 % SDS, 1 % NP-40, 1 % Sodium Deoxycholate supplemented  
877 with 1 X Protease and Phosphatase inhibitor cocktails (Sigma Aldrich) . The cell lysate  
878 was transferred to a pre-chilled tube and debris removed by centrifugation (5 min, 10  
879 000 g, 4 °C). The supernatant was transferred to a clean tube and total protein  
880 concentration determined using the BCA assay (Thermo Scientific). Equivalent  
881 amounts of protein (10-30  $\mu$ g) were loaded and samples prepared with LDS sample  
882 buffer (Invitrogen, final concentration 25 %) containing 2.5 %  $\beta$ -mercaptoethanol and  
883 boiled at 95 °C for 5 min before centrifuging briefly to remove debris.

884 Proteins were resolved on pre-cast 4-12 % NuPAGE 1.5 mm 10 well SDS gels  
885 (Invitrogen). The gels were rinsed with deionised water and placed in an X-cell  
886 Surelock Mini-cell running tank. The inner buffer chamber was filled with sufficient 1 X  
887 MOPS SDS Running buffer (Invitrogen) to cover the wells which were then rinsed with  
888 buffer expelled from a needle and syringe. 500  $\mu$ l NuPAGE Antioxidant (Invitrogen)  
889 was added to the inner buffer chamber. The outer buffer chamber was filled with  
890 approximately 600 ml 1 X MOPS SDS Running buffer. 12  $\mu$ l of Novex pre-stained sharp  
891 protein markers (Invitrogen) were loaded into the first well, followed by the boiled  
892 samples. Electrophoresis was performed at 200 V until the tracking dye reached the  
893 end of the gel.

894 For detection of ERK or MSK, proteins were transferred to a PVDF (0.45  $\mu$ m, Millipore)  
895 membrane, which had been activated by immersion for 100 % methanol for 15 s and

896 then placed in deionised water for 2 min. For detection of histone H3, proteins were  
897 transferred to a nitrocellulose (0.2  $\mu$ m, Whatman). Proteins were detected with  
898 appropriate primary antibodies and HRP-conjugated secondary antibodies (Table S3).  
899 Immunoreactive bands were detected by enhanced chemiluminescence (Pierce).

900

### 901 **Reverse transcription quantitative PCR (RT-qPCR)**

902 RNA was isolated from NRVMs and ARVMs using the RNeasy Micro Kit (Qiagen) and  
903 DNA removed by an on-column DNA digestion step. RNA was isolated from adult rat  
904 LV tissue, *Msk1/2* KO mouse LV tissue and human cardiomyocytes using TRIzol  
905 reagent (Invitrogen).

906 500-750 ng RNA was reverse transcribed using Superscript II (Invitrogen), the final  
907 cDNA synthesis reaction diluted 1/10 - 1/20 in nuclease free water and stored at -20  
908 °C until required. Primer sequences were as previously described, unless otherwise  
909 indicated (Table S4), and were designed to span intron-exon boundaries to avoid  
910 amplification of genomic DNA (Higazi et al., 2009). The stability of a panel of reference  
911 genes was assessed using the GeNorm method for the experiments performed, and  
912 the most stable selected (Vandesompele et al., 2002). Three or four reference genes  
913 were selected for each set of experimental conditions for normalisation of gene  
914 expression qPCR analysis based on their stability for each set of samples and reaction  
915 conditions. Final primer concentration was 200 nM for all targets.

916 Reactions were performed on a LightCycler® 480 System (Roche) or on a CFX384  
917 (BIO-RAD) in a 384-well format using Platinum SYBR Green qPCR SuperMix-UDG  
918 (Life Technologies). Expression analysis was carried out using the comparative  $\Delta$ Ct  
919 method as described (Livak and Schmittgen, 2001).

920

## 921 **Chromatin-immunoprecipitation (ChIP)**

922 To NRVMs in 6-well dishes in culture medium, formaldehyde was added to a  
923 concentration of 1 % and incubated for 10 min on a rocking platform at room  
924 temperature. Cross-linking was terminated by the addition of 125 mM glycine for 10  
925 min at room temperature. After washing once in ice-cold PBS, cells were collected into  
926 0.5 ml PBS by scraping and subsequent centrifugation (5 min, 600 xg, 4 °C). Cell  
927 pellets were re-suspended in 1 ml ice-cold hypotonic membrane lysis buffer (50 mM  
928 Tris-HCl, pH 7.5, 5 mM EDTA, 140 mM NaCl, 1 % Triton X-100, 0.5 % NP-40  
929 supplemented with 1 X Protease and Phosphatase inhibitor cocktails). The released  
930 nuclei were pelleted by centrifugation (3 min, 12000 xg, 4 °C) and then re-suspended  
931 in 200 µl SDS lysis buffer (50 mM Tris-HCl, pH 7.5, 10 mM EDTA, 1 % SDS  
932 supplemented with 1 X Protease and Phosphatase inhibitor cocktails). Cross-linked  
933 chromatin was fragmented by sonication using a pre-chilled Diagenode Bioruptor on  
934 the high power setting for three x 5 min cycles of 30 s 'on', 30 s 'off'. The sonication  
935 protocol produced fragments predominantly below 500 bp. Wash buffer + (10 mM Tris-  
936 HCl, pH 7.5, 140 mM NaCl, 1 mM EDTA, 0.5 mM EGTA, 1 % Triton X-100, 0.1 % SDS  
937 and 0.1% Na deoxycholate supplemented with 1 X Protease and Phosphatase inhibitor  
938 cocktails) was then added to the lysate. After removal of remaining debris by  
939 centrifugation (10 min, 12000 xg, 4 °C), the supernatant (sonicated chromatin) was  
940 processed for immunoprecipitation.

941 Proteins of interest were precipitated using antibodies pre-conjugated to Dynabeads  
942 Protein A (Invitrogen). To this end, beads were washed in 4 changes of wash buffer  
943 and collected by the use of a DynaMag Magnet. Per ChIP, 10 µl washed beads and 5  
944 µg Brg1 or phosphorylated H3S28 antibody were added to 90 µl wash buffer and



945 incubated for two h at 40 rpm on a rotator at 4 °C. For the negative control ChIP, beads  
946 were used in the absence of specific antibody.

947 Prior to IP, wash buffer was removed from pre-prepared antibody-bead complexes and  
948 200 µl chromatin added to each tube. 200 µl chromatin was reserved from each  
949 experimental condition as an Input sample. Chromatin was incubated with the  
950 antibody-bead complexes overnight at 4 °C on a 40 rpm rotator after which unbound  
951 chromatin was washed from the beads. Wash buffer was used for the first two washes,  
952 followed by one wash in high-salt wash buffer (wash buffer + with 500 mM NaCl) and  
953 finally two washes in TE buffer. At the end of the washes, the solution was transferred  
954 to a fresh tube and TE buffer removed from the beads. Elution of chromatin from the  
955 beads and protein digest with proteinase K were combined into one step. To this end,  
956 150 µl complete elution buffer (20 mM Tris-HCl, pH 7.5, 50 mM NaCl, 5 mM EDTA, 1%  
957 SDS and 100 µg/ml proteinase K (Sigma)) was added and the beads incubated for 4  
958 h at 68 °C with shaking at 1300 rpm. The supernatant was removed from the tube and  
959 150 µl elution buffer (complete elution buffer without SDS and Proteinase K) added.  
960 After a further 5 min incubation at 68 °C, the two supernatants were combined. Input  
961 samples were processed in parallel with the ChIP samples. DNA was purified from  
962 each supernatant using the QIAEX II Gel extraction kit (Qiagen) following the  
963 manufacturer's protocol for concentrating DNA from solutions. DNA was eluted in 40  
964 µl buffer EB and stored at -20 °C until required.

965 Precipitated DNA for each experimental condition and antibody was quantified by  
966 qPCR using SYBR-GreenER in 12.5 µl reactions performed in triplicate (Invitrogen).  
967 Primers were designed to amplify the promoter sequences of c-Fos and c-Jun and the  
968 sequences of the primers used are given in appendix A. Primer binding sites were  
969 selected that encompassed predicted transcription factor binding sites. qPCR was



970 performed using a CFX96 (BIO-RAD) or Roche Light Cycler480 real-time PCR  
971 instrument and cycling parameters were taken from the manufacturer's instructions for  
972 SYBR-GreenER (Thermo Life Technologies).

973 The Ct values from triplicate technical replicates from each sample were averaged to  
974 generate SampleCT and InputCt values. The values were analysed by expressing  
975 enrichment of the immunoprecipitated DNA for each antibody as a percentage of the  
976 input sample for the relevant experimental condition according to the equation,  
977  $\text{Enrichment} = 2^{(\text{Sample Ct} - \text{Input Ct})}$ . ChIPs were repeated on at least 4 independent  
978 experimental samples.

979

#### 980 **Wistar rat jugular vein infusion of endothelin-1/isoproterenol**

981 Experimental protocols were approved by the local ethical committee (Ethische  
982 Commissie, Dierproeven, KU Leuven), under license number P055/2017. 250-300 g  
983 Wistar (RccHan:WIST) male rats were obtained from Harlan (NL). Anesthesia was  
984 induced using ketamine and xylazine in combination (100 mg/kg ketamine, 10 mg/kg  
985 xylazine) by IP. Body temperature was maintained throughout the procedure with a  
986 heated mat (Sanitas).

987 A small area of chest was shaved with depilatory cream (Veet) and limbs secured with  
988 tape. A small incision was made just above and to the right hand side of the sternum  
989 and the skin stretched thin with a hemostat to make the jugular vein visible. A 30 gauge  
990 needle attached to a cannula (2F x 30 cm, green, Portex) was inserted into the jugular  
991 vein, just before it branches and the vein disappears under the pectoral muscle.

992 The cannula was attached to a 5 ml syringe and a dispensing pump (Harvard  
993 Apparatus) dispensing the required volume (300-500  $\mu$ l) over a 15-min period. A slow

994 steady release of the dosage in this manner was required to reduce the acute  
995 vasoconstrictive effect of a single rapid injection of the same dosage.

996 Endothelin-1 (Millipore) was administered at a final dosage of 1000 ng/kg and  
997 isoproterenol hydrochloride (Sigma Aldrich) at 50 µg/kg. Final working concentrations  
998 prepared in sterile saline and vehicle-only controls (Ctrl) were administered the same  
999 volume of sterile saline over a 15 min period. On withdrawal of the needle, medical  
1000 gauze was placed over the wound and pressure applied until bleeding stopped. The  
1001 wound was cleaned with iodine solution and for the 24 h time point, the skin was  
1002 sutured together with interrupted stiches.

1003

1004 For the 15 min time point, rats were sacrificed by cervical dislocation and heart  
1005 removed for dissection immediately. For the 24 h time point, rats were allowed to  
1006 recover alone in a cage on heated mat, with easy access to food and water. The  
1007 humane 24 h end-point was performed by anesthesia induction in an isoflurane  
1008 chamber followed by cervical dislocation and immediate removal of the heart.

1009 Whole hearts were removed and placed in ice cold PBS briefly to remove excess blood,  
1010 dissected using a sterile surgical scalpel in PBS on ice and weighed on a microbalance  
1011 before snap-freezing in liquid nitrogen and stored at -80 °C.

1012

### 1013 **Adenoviral methods**

1014 Adenoviruses were produced and amplified in HEK293 cells and purified as previously  
1015 described (Archer et al., 2017). Adenoviruses to express the WT and catalytically dead  
1016 D565A mutant (DN) of MSK1 were generated using the AdEasy method by sub-cloning

1017 the cDNA for MSK1 or its mutant from a pCMV5 backbone (kindly provided by Prof D  
1018 Alessi, University of Dundee) into pShuttle CMV (Alessi, 1997). PacI digested  
1019 recombinant plasmids were transfected into HEK293 cells and crude adenovirus  
1020 harvested after 10-14 days. Adenoviruses for dominant negative (DN)-Jun and AP-1  
1021 luciferase were purchased from Vector Biolabs. All viruses were amplified in HEK293  
1022 cells, purified using the Vivapure Adenopack 100 (Sartorius) and titrated by end-point  
1023 dilution in HEK293 cells.

1024

### 1025 **Analysis of luciferase reporter activity**

1026 The AP-1 luciferase reporter was expressed using an adenoviral vector and luciferase  
1027 activity determined using a luciferase assay kit from Promega as previously described  
1028 (Higazi et al., 2009). Briefly, cultures of NRVM in 48 well plates were infected in  
1029 duplicate and agonist treatments applied for 24 h. After removal of medium, cells were  
1030 lysed in 150 µl 1X cell culture lysis buffer (Promega). Luciferase activity present in 10  
1031 µl of lysate clarified by centrifugation was then quantitated in white 96-well luminometer  
1032 plate (Microumat Plus 1b 96V instrument, Berthold Technologies) using 50 µl of  
1033 luciferase assay reagent (Promega).

1034

### 1035 **Small interfering RNA (siRNA) knockdown**

1036 Stealth™ siRNAs were purchased from Invitrogen. To achieve sufficient knockdown of  
1037 *Msk1* or *Brg1*, two siRNAs targeting different regions of the target mRNA were  
1038 selected. Medium GC-content non-silencing siRNA (Invitrogen) was transfected as a  
1039 negative control. Transfections were performed at the onset of the serum starvation  
1040 period using Dharmafect I and Accell medium (Dharmacon). To transfect NRVM

1041 cultured in 12-well dishes, 200 pmol siRNA duplexes were made up to 100  $\mu$ l total  
1042 volume in Accell media and the solution mixed by pipetting. In a separate tube, 6  $\mu$ l  
1043 Dharmafect I was added to 94  $\mu$ l Accell medium and mixed. After incubation for 5 min  
1044 at room temperature, the tubes were combined, mixed and incubated for a further 20  
1045 min at room temperature. During this incubation, NRVM culture medium was replaced  
1046 with 800  $\mu$ l pre-warmed Accell medium. At the end of the 20 min incubation,  
1047 transfection complexes were added to the cultures in a drop-wise manner and  
1048 incubated with the cells for 6 h. Post-transfection, Accell medium was replaced with  
1049 fresh maintenance medium and the remainder of the serum starvation period carried  
1050 out.

1051

## 1052 **Statistical analysis**

1053 Data were collated in Microsoft Excel and statistical analysis performed using  
1054 GraphPad Prism v7.0 or v8.0. Data is presented as the mean of at least three  
1055 independent experiments  $\pm$  the standard error of the mean (SEM). The number of  
1056 independent experiments for each figure is indicated in the figure legend. For  
1057 comparison between two groups, p-values were calculated using the unpaired two-  
1058 tailed t-test. For comparison of two groups where normalisation of data had been  
1059 performed (i.e. one value was fixed at 1.0) a two-tailed paired t-test was used. To  
1060 calculate p-values for data comparing three or more groups, one-way ANOVA with  
1061 Bonferroni's multiple comparison test for p value correction. P-values less than 0.05  
1062 were taken as significant. Individual (adjusted) p values are indicated on the figures.

1063

1064

1065 **References**

- 1066 Alessi, D.R. (1997). The protein kinase C inhibitors Ro 318220 and GF 109203X are  
1067 equally potent inhibitors of MAPKAP kinase-1beta (Rsk-2) and p70 S6 kinase. *FEBS*  
1068 *Lett.* *402*, 121–123.
- 1069 Alkass, K., Panula, J., Westman, M., Wu, T.-D., Guerquin-Kern, J.-L., and Bergmann,  
1070 O. (2015). No Evidence for Cardiomyocyte Number Expansion in Preadolescent Mice.  
1071 *Cell* *163*, 1026–1036.
- 1072 Archer, C.R., Robinson, E.L., Drawnel, F.M., and Roderick, H.L. (2017). Endothelin-1  
1073 promotes hypertrophic remodelling of cardiac myocytes by activating sustained  
1074 signalling and transcription downstream of endothelin type A receptors. *Cell. Signal.*  
1075 *36*, 240–254.
- 1076 Arthur, J.S., and Cohen, P. (2000). MSK1 is required for CREB phosphorylation in  
1077 response to mitogens in mouse embryonic stem cells. *FEBS Lett.* *482*, 44–48.
- 1078 Auger-Messier, M., Accornero, F., Goonasekera, S.A., Bueno, O.F., Lorenz, J.N., van  
1079 Berlo, J.H., Willette, R.N., and Molkenin, J.D. (2013). Unrestrained p38 MAPK  
1080 Activation in *Dusp1/4* Double Null Mice Induces Cardiomyopathy. *Circ Res* *112*, 48–  
1081 56.
- 1082 Awad, S., Kunhi, M., Little, G.H., Bai, Y., An, W., Bers, D., Kedes, L., and Poizat, C.  
1083 (2013). Nuclear CaMKII enhances histone H3 phosphorylation and remodels  
1084 chromatin during cardiac hypertrophy. *Nucleic Acids Res.* *41*, 7656–7672.
- 1085 Awad, S., Al-Haffar, K.M.A., Marashly, Q., Quijada, P., Kunhi, M., Al-Yacoub, N.,  
1086 Wade, F.S., Mohammed, S.F., Al-Dayel, F., Sutherland, G., et al. (2015). Control of  
1087 histone H3 phosphorylation by CaMKII $\delta$  in response to haemodynamic cardiac stress.  
1088 *J. Pathol.* *235*, 606–618.
- 1089 Backs, J., Song, K., Bezprozvannaya, S., Chang, S., and Olson, E.N. (2006). CaM  
1090 kinase II selectively signals to histone deacetylase 4 during cardiomyocyte  
1091 hypertrophy. *J Clin Invest* *116*, 1853–1864.
- 1092 Bain, J., Plater, L., Elliott, M., Shpiro, N., Hastie, C.J., Mclauchlan, H., Klevernic, I.,  
1093 Arthur, J.S.C., Alessi, D.R., and Cohen, P. (2007). The selectivity of protein kinase  
1094 inhibitors: a further update. *Biochem J* *408*, 297–315.
- 1095 Balmanno, K., and Cook, S.J. (1999). Sustained MAP kinase activation is required for  
1096 the expression of cyclin D1, p21Cip1 and a subset of AP-1 proteins in CCL39 cells.  
1097 *Oncogene* *18*, 3085–3097.
- 1098 Bergmann, O., and Jovinge, S. (2012). Isolation of Cardiomyocyte Nuclei from Post-  
1099 mortem Tissue. *J Vis Exp*.
- 1100 Beyer, M.E., Nerz, S., Krämer, B.K., and Hoffmeister, H.M. (1994). Hemodynamic and  
1101 inotropic effects of endothelin-1 in vivo. *Basic Res. Cardiol.* *89*, 39–49.

- 1102 Boluyt, M.O., Long, X., Eschenhagen, T., Mende, U., Schmitz, W., Crow, M.T., and  
1103 Lakatta, E.G. (1995). Isoproterenol infusion induces alterations in expression of  
1104 hypertrophy-associated genes in rat heart. *Am. J. Physiol.* *269*, H638-647.
- 1105 Bueno, O.F., De Windt, L.J., Tymitz, K.M., Witt, S.A., Kimball, T.R., Klevitsky, R.,  
1106 Hewett, T.E., Jones, S.P., Lefer, D.J., Peng, C.-F., et al. (2000). The MEK1–ERK1/2  
1107 signaling pathway promotes compensated cardiac hypertrophy in transgenic mice.  
1108 *EMBO J* *19*, 6341–6350.
- 1109 Chen, L., Glover, J.N., Hogan, P.G., Rao, A., and Harrison, S.C. (1998). Structure of  
1110 the DNA-binding domains from NFAT, Fos and Jun bound specifically to DNA. *Nature*  
1111 *392*, 42–48.
- 1112 Chiu, R., Boyle, W.J., Meek, J., Smeal, T., Hunter, T., and Karin, M. (1988). The c-Fos  
1113 protein interacts with c-Jun/AP-1 to stimulate transcription of AP-1 responsive genes.  
1114 *Cell* *54*, 541–552.
- 1115 Clayton, A.L., and Mahadevan, L.C. (2003). MAP kinase-mediated phosphoacetylation  
1116 of histone H3 and inducible gene regulation. *FEBS Lett.* *546*, 51–58.
- 1117 Clayton, A.L., Rose, S., Barratt, M.J., and Mahadevan, L.C. (2000).  
1118 Phosphoacetylation of histone H3 on c-fos- and c-jun-associated nucleosomes upon  
1119 gene activation. *EMBO J* *19*, 3714–3726.
- 1120 Deak, M., Clifton, A.D., Lucocq, J.M., and Alessi, D.R. (1998a). Mitogen- and stress-  
1121 activated protein kinase-1 (MSK1) is directly activated by MAPK and SAPK2/p38, and  
1122 may mediate activation of CREB. *The EMBO Journal* *17*, 4426–4441.
- 1123 Deak, M., Clifton, A.D., Lucocq, L.M., and Alessi, D.R. (1998b). Mitogen- and stress-  
1124 activated protein kinase-1 (MSK1) is directly activated by MAPK and SAPK2/p38, and  
1125 may mediate activation of CREB. *EMBO J.* *17*, 4426–4441.
- 1126 Drawnel, F.M., Wachten, D., Molkenin, J.D., Maillet, M., Aronsen, J.M., Swift, F.,  
1127 Sjaastad, I., Liu, N., Catalucci, D., Mikoshiba, K., et al. (2012). Mutual antagonism  
1128 between IP3R2 and miRNA-133a regulates calcium signals and cardiac hypertrophy.  
1129 *J Cell Biol* *199*, 783–798.
- 1130 Dries, E., Santiago, D.J., Gilbert, G., Lenaerts, I., Vandenberg, B., Nagaraju, C.K.,  
1131 Johnson, D.M., Holemans, P., Roderick, H.L., Macquaide, N., et al. (2018).  
1132 Hyperactive ryanodine receptors in human heart failure and ischaemic cardiomyopathy  
1133 reside outside of couplons. *Cardiovasc. Res.* *114*, 1512–1524.
- 1134 Duncan, E.A., Anest, V., Cogswell, P., and Baldwin, A.S. (2006). The kinases MSK1  
1135 and MSK2 are required for epidermal growth factor-induced, but not tumor necrosis  
1136 factor-induced, histone H3 Ser10 phosphorylation. *J. Biol. Chem.* *281*, 12521–12525.
- 1137 Dyson, M.H., Thomson, S., Inagaki, M., Goto, H., Arthur, S.J., Nightingale, K., Iborra,  
1138 F.J., and Mahadevan, L.C. (2005). MAP kinase-mediated phosphorylation of distinct  
1139 pools of histone H3 at S10 or S28 via mitogen- and stress-activated kinase 1/2. *Journal*  
1140 *of Cell Science* *118*, 2247–2259.



- 1141 Eferl, R., and Wagner, E.F. (2003). AP-1: a double-edged sword in tumorigenesis. *Nat.*  
1142 *Rev. Cancer* 3, 859–868.
- 1143 Garrington, T.P., and Johnson, G.L. (1999). Organization and regulation of mitogen-  
1144 activated protein kinase signaling pathways. *Curr. Opin. Cell Biol.* 11, 211–218.
- 1145 Gehani, S.S., Agrawal-Singh, S., Dietrich, N., Christophersen, N.S., Helin, K., and  
1146 Hansen, K. (2010). Polycomb group protein displacement and gene activation through  
1147 MSK-dependent H3K27me3S28 phosphorylation. *Mol. Cell* 39, 886–900.
- 1148 Gille, H., Sharrocks, A.D., and Shaw, P.E. (1992). Phosphorylation of transcription  
1149 factor p62 TCF by MAP kinase stimulates ternary complex formation at c- fos promoter.  
1150 *Nature* 358, 414–417.
- 1151 Gilsbach, R., Preissl, S., Grüning, B.A., Schnick, T., Burger, L., Benes, V., Würch, A.,  
1152 Bönisch, U., Günther, S., Backofen, R., et al. (2014). Dynamic DNA methylation  
1153 orchestrates cardiomyocyte development, maturation and disease. *Nature*  
1154 *Communications* 5, 1–13.
- 1155 Glover, J.N., and Harrison, S.C. (1995). Crystal structure of the heterodimeric bZIP  
1156 transcription factor c-Fos-c-Jun bound to DNA. *Nature* 373, 257–261.
- 1157 Hang, C.T., Yang, J., Han, P., Cheng, H.-L., Shang, C., Ashley, E., Zhou, B., and  
1158 Chang, C.-P. (2010). Chromatin regulation by Brg1 underlies heart muscle  
1159 development and disease. *Nature* 466, 62–67.
- 1160 Heineke, J., and Molkentin, J.D. (2006). Regulation of cardiac hypertrophy by  
1161 intracellular signalling pathways. *Nature Reviews Molecular Cell Biology* 7, 589–600.
- 1162 Hess, J., Angel, P., and Schorpp-Kistner, M. (2004). AP-1 subunits: quarrel and  
1163 harmony among siblings. *J. Cell. Sci.* 117, 5965–5973.
- 1164 Higazi, D.R., Fearnley, C.J., Drawnel, F.M., Talasila, A., Corps, E.M., Ritter, O.,  
1165 McDonald, F., Mikoshiba, K., Bootman, M.D., and Roderick, H.L. (2009). Endothelin-  
1166 1-stimulated InsP3-induced Ca<sup>2+</sup> release is a nexus for hypertrophic signaling in  
1167 cardiac myocytes. *Mol. Cell* 33, 472–482.
- 1168 Hilfiker-Kleiner, D., Hilfiker, A., Castellazzi, M., Wollert, K.C., Trautwein, C., Schunkert,  
1169 H., and Drexler, H. (2006). JunD attenuates phenylephrine-mediated cardiomyocyte  
1170 hypertrophy by negatively regulating AP-1 transcriptional activity. *Cardiovasc Res* 71,  
1171 108–117.
- 1172 Iwaki, K., Sukhatme, V.P., Shubeita, H.E., and Chien, K.R. (1990). Alpha- and beta-  
1173 adrenergic stimulation induces distinct patterns of immediate early gene expression in  
1174 neonatal rat myocardial cells. fos/jun expression is associated with sarcomere  
1175 assembly; Egr-1 induction is primarily an alpha 1-mediated response. *J. Biol. Chem.*  
1176 265, 13809–13817.
- 1177 Izumo, S., Nadal-Ginard, B., and Mahdavi, V. (1988). Protooncogene induction and  
1178 reprogramming of cardiac gene expression produced by pressure overload. *Proc. Natl.*  
1179 *Acad. Sci. U.S.A.* 85, 339–343.

- 1180 Johannessen, M., Delghandi, M.P., and Moens, U. (2004). What turns CREB on? *Cell.*  
1181 *Signal.* 16, 1211–1227.
- 1182 Karin, M., Liu, Z., and Zandi, E. (1997). AP-1 function and regulation. *Current Opinion*  
1183 *in Cell Biology* 9, 240–246.
- 1184 Kasper, L.H., Thomas, M.C., Zambetti, G.P., and Brindle, P.K. (2011). Double null cells  
1185 reveal that CBP and p300 are dispensable for p53 targets p21 and Mdm2 but variably  
1186 required for target genes of other signaling pathways. *Cell Cycle* 10, 212–221.
- 1187 Kim, J.-Y., Kim, K.-B., Son, H.-J., Chae, Y.-C., Oh, S.-T., Kim, D.-W., Pak, J.H., and  
1188 Seo, S.-B. (2012). H3K27 methylation and H3S28 phosphorylation-dependent  
1189 transcriptional regulation by INHAT subunit SET/TAF- $\beta$ . *FEBS Letters* 586, 3159–  
1190 3165.
- 1191 Kim-Mitsuyama, S., Izumi, Y., Izumiya, Y., Namba, M., Yoshida, K., Wake, R.,  
1192 Yoshiyama, M., and Iwao, H. (2006). Dominant-negative c-Jun inhibits rat cardiac  
1193 hypertrophy induced by angiotensin II and hypertension. *Gene Therapy* 13, 348–355.
- 1194 Liao, P., Georgakopoulos, D., Kovacs, A., Zheng, M., Lerner, D., Pu, H., Saffitz, J.,  
1195 Chien, K., Xiao, R.-P., Kass, D.A., et al. (2001). The in vivo role of p38 MAP kinases  
1196 in cardiac remodeling and restrictive cardiomyopathy. *Proc Natl Acad Sci U S A* 98,  
1197 12283–12288.
- 1198 Liu, R., van Berlo, J.H., York, A.J., Maillet, M., Vagnozzi, R.J., and Molkenin, J.D.  
1199 (2016). DUSP8 Regulates Cardiac Ventricular Remodeling by Altering ERK1/2  
1200 Signaling. *Circ Res* 119, 249–260.
- 1201 Liu, W., Zi, M., Jin, J., Prehar, S., Oceandy, D., Kimura, T.E., Lei, M., Neyses, L.,  
1202 Weston, A.H., Cartwright, E.J., et al. (2009). Cardiac-specific deletion of mkk4 reveals  
1203 its role in pathological hypertrophic remodeling but not in physiological cardiac growth.  
1204 *Circ. Res.* 104, 905–914.
- 1205 Livak, K.J., and Schmittgen, T.D. (2001). Analysis of relative gene expression data  
1206 using real-time quantitative PCR and the 2(-Delta Delta C(T)) Method. *Methods* 25,  
1207 402–408.
- 1208 Malakhova, M., Kurinov, I., Liu, K., Zheng, D., D'Angelo, I., Shim, J.-H., Steinman, V.,  
1209 Bode, A.M., and Dong, Z. (2009). Structural Diversity of the Active N-Terminal Kinase  
1210 Domain of p90 Ribosomal S6 Kinase 2. *PLOS ONE* 4, e8044.
- 1211 Markou, T., and Lazou, A. (2002). Phosphorylation and activation of mitogen- and  
1212 stress-activated protein kinase-1 in adult rat cardiac myocytes by G-protein-coupled  
1213 receptor agonists requires both extracellular-signal-regulated kinase and p38 mitogen-  
1214 activated protein kinase. *Biochem. J.* 365, 757–763.
- 1215 Markou, T., Hadzopoulou-Cladaras, M., and Lazou, A. (2004). Phenylephrine induces  
1216 activation of CREB in adult rat cardiac myocytes through MSK1 and PKA signaling  
1217 pathways. *J. Mol. Cell. Cardiol.* 37, 1001–1011.



- 1218 Markou, T., Cieslak, D., Gaitanaki, C., and Lazou, A. (2009). Differential roles of  
1219 MAPKs and MSK1 signalling pathways in the regulation of c-Jun during phenylephrine-  
1220 induced cardiac myocyte hypertrophy. *Mol. Cell. Biochem.* 322, 103–112.
- 1221 McCoy, C.E., Campbell, D.G., Deak, M., Bloomberg, G.B., and Arthur, J.S.C. (2005).  
1222 MSK1 activity is controlled by multiple phosphorylation sites. *Biochem. J.* 387, 507–  
1223 517.
- 1224 Mutlak, M., and Kehat, I. (2015). Extracellular signal-regulated kinases 1/2 as  
1225 regulators of cardiac hypertrophy. *Front Pharmacol* 6.
- 1226 Petrich, B.G., Molkentin, J.D., and Wang, Y. (2003). Temporal activation of c-Jun N-  
1227 terminal kinase in adult transgenic heart via cre-loxP-mediated DNA recombination.  
1228 *FASEB J.* 17, 749–751.
- 1229 Phair, R.D., and Misteli, T. (2000). High mobility of proteins in the mammalian cell  
1230 nucleus. *Nature* 404, 604–609.
- 1231 Purcell, N.H., Wilkins, B.J., York, A., Saba-El-Leil, M.K., Meloche, S., Robbins, J., and  
1232 Molkentin, J.D. (2007). Genetic inhibition of cardiac ERK1/2 promotes stress-induced  
1233 apoptosis and heart failure but has no effect on hypertrophy in vivo. *Proc. Natl. Acad.*  
1234 *Sci. U.S.A.* 104, 14074–14079.
- 1235 Roux, P.P., and Blenis, J. (2004). ERK and p38 MAPK-activated protein kinases: a  
1236 family of protein kinases with diverse biological functions. *Microbiol. Mol. Biol. Rev.* 68,  
1237 320–344.
- 1238 Saadatmand, A.R., Sramek, V., Weber, S., Finke, D., Dewenter, M., Sticht, C., Gretz,  
1239 N., Wüstemann, T., Hagenmueller, M., Kuenzel, S.R., et al. (2019). CaM kinase II  
1240 regulates cardiac hemoglobin expression through histone phosphorylation upon  
1241 sympathetic activation. *PNAS* 116, 22282–22287.
- 1242 Sanna, B., Bueno, O.F., Dai, Y.-S., Wilkins, B.J., and Molkentin, J.D. (2005). Direct  
1243 and Indirect Interactions between Calcineurin-NFAT and MEK1-Extracellular Signal-  
1244 Regulated Kinase 1/2 Signaling Pathways Regulate Cardiac Gene Expression and  
1245 Cellular Growth. *Mol Cell Biol* 25, 865–878.
- 1246 Savarese, G., and Lund, L.H. (2017). Global Public Health Burden of Heart Failure.  
1247 *Card Fail Rev* 3, 7–11.
- 1248 Selvetella, G., Hirsch, E., Notte, A., Tarone, G., and Lembo, G. (2004). Adaptive and  
1249 maladaptive hypertrophic pathways: points of convergence and divergence.  
1250 *Cardiovasc Res* 63, 373–380.
- 1251 Soloaga, A., Thomson, S., Wiggin, G.R., Rampersaud, N., Dyson, M.H., Hazzalin,  
1252 C.A., Mahadevan, L.C., and Arthur, J.S.C. (2003a). MSK2 and MSK1 mediate the  
1253 mitogen- and stress-induced phosphorylation of histone H3 and HMG-14. *EMBO J* 22,  
1254 2788–2797.
- 1255 Soloaga, A., Thomson, S., Wiggin, G.R., Rampersaud, N., Dyson, M.H., Hazzalin,  
1256 C.A., Mahadevan, L.C., and Arthur, J.S.C. (2003b). MSK2 and MSK1 mediate the

- 1257 mitogen- and stress-induced phosphorylation of histone H3 and HMG-14. *EMBO J* 22,  
1258 2788–2797.
- 1259 Song, H.K., Hong, S.-E., Kim, T., and Kim, D.H. (2012). Deep RNA Sequencing  
1260 Reveals Novel Cardiac Transcriptomic Signatures for Physiological and Pathological  
1261 Hypertrophy. *PLoS One* 7.
- 1262 Tachibana, H., Perrino, C., Takaoka, H., Davis, R.J., Naga Prasad, S.V., and  
1263 Rockman, H.A. (2006). JNK1 is required to preserve cardiac function in the early  
1264 response to pressure overload. *Biochem. Biophys. Res. Commun.* 343, 1060–1066.
- 1265 Takeuchi, K., Yoshikawa, J., Omura, T., Yoshiyama, M., Yoshida, K., Nakamura, Y.,  
1266 Kim, S., Omura, T., Yoshiyama, M., Yoshida, K., et al. Dominant Negative Mutant of c-  
1267 Jun Inhibits Cardiomyocyte Hypertrophy Induced by Endothelin 1 and Phenylephrine.
- 1268 Thienpont, B., Aronsen, J.M., Robinson, E.L., Okkenhaug, H., Loche, E., Ferrini, A.,  
1269 Brien, P., Alkass, K., Tomasso, A., Agrawal, A., et al. (2017). The H3K9  
1270 dimethyltransferases EHMT1/2 protect against pathological cardiac hypertrophy. *J Clin  
1271 Invest* 127, 335–348.
- 1272 Torgerson, T.R., Colosia, A.D., Donahue, J.P., Lin, Y.Z., and Hawiger, J. (1998).  
1273 Regulation of NF-kappa B, AP-1, NFAT, and STAT1 nuclear import in T lymphocytes  
1274 by noninvasive delivery of peptide carrying the nuclear localization sequence of NF-  
1275 kappa B p50. *J. Immunol.* 161, 6084–6092.
- 1276 Ulm, S., Liu, W., Zi, M., Tsui, H., Chowdhury, S.K., Endo, S., Satoh, Y., Prehar, S.,  
1277 Wang, R., Cartwright, E.J., et al. (2014). Targeted deletion of ERK2 in cardiomyocytes  
1278 attenuates hypertrophic response but provokes pathological stress induced cardiac  
1279 dysfunction. *Journal of Molecular and Cellular Cardiology* 72, 104–116.
- 1280 Vandesompele, J., De Preter, K., Pattyn, F., Poppe, B., Van Roy, N., De Paepe, A.,  
1281 and Speleman, F. (2002). Accurate normalization of real-time quantitative RT-PCR  
1282 data by geometric averaging of multiple internal control genes. *Genome Biology* 3,  
1283 research0034.1.
- 1284 Watson, P.A., Birdsey, N., Huggins, G.S., Svensson, E., Heppe, D., and Knaub, L.  
1285 (2010). Cardiac-specific overexpression of dominant-negative CREB leads to  
1286 increased mortality and mitochondrial dysfunction in female mice. *Am. J. Physiol. Heart  
1287 Circ. Physiol.* 299, H2056-2068.
- 1288 Wiggin, G.R., Soloaga, A., Foster, J.M., Murray-Tait, V., Cohen, P., and Arthur, J.S.C.  
1289 (2002a). MSK1 and MSK2 are required for the mitogen- and stress-induced  
1290 phosphorylation of CREB and ATF1 in fibroblasts. *Mol. Cell. Biol.* 22, 2871–2881.
- 1291 Wiggin, G.R., Soloaga, A., Foster, J.M., Murray-Tait, V., Cohen, P., and Arthur, J.S.C.  
1292 (2002b). MSK1 and MSK2 Are Required for the Mitogen- and Stress-Induced  
1293 Phosphorylation of CREB and ATF1 in Fibroblasts. *Mol Cell Biol* 22, 2871–2881.
- 1294 Windak, R., Müller, J., Felley, A., Akhmedov, A., Wagner, E.F., Pedrazzini, T., Sumara,  
1295 G., and Ricci, R. (2013). The AP-1 Transcription Factor c-Jun Prevents Stress-  
1296 Imposed Maladaptive Remodeling of the Heart. *PLoS One* 8.

1297 Wu Guangyu, Yussman Martin G., Barrett Thomas J., Hahn Harvey S., Osinska  
1298 Hanna, Hilliard George M., Wang Xuejun, Toyokawa Tsuyoshi, Yatani Atsuko, Lynch  
1299 Roy A., et al. (2001). Increased Myocardial Rab GTPase Expression. *Circulation*  
1300 *Research* 89, 1130–1137.

1301 Yang, C.-M., Luo, S.-F., Hsieh, H.-L., Chi, P.-L., Lin, C.-C., Wu, C.-C., and Hsiao, L.-  
1302 D. (2010). Interleukin-1beta induces ICAM-1 expression enhancing leukocyte  
1303 adhesion in human rheumatoid arthritis synovial fibroblasts: involvement of ERK, JNK,  
1304 AP-1, and NF-kappaB. *J. Cell. Physiol.* 224, 516–526.

1305 Zhong, S., Jansen, C., She, Q.-B., Goto, H., Inagaki, M., Bode, A.M., Ma, W.-Y., and  
1306 Dong, Z. (2001). Ultraviolet B-induced Phosphorylation of Histone H3 at Serine 28 Is  
1307 Mediated by MSK1. *J. Biol. Chem.* 276, 33213–33219.

1308

### 1309 **Acknowledgments**

1310 We would like to thank Dario Alessi (FRS FRSE FMedSci, University of Dundee) for  
1311 providing the pCMV5 backbone vector for sub-cloning of MSK1 and Peter Pokreisz  
1312 (CoBioRes NV and KU Leuven) for assistance in establishing techniques for jugular  
1313 vein infusion of rats.

1314

### 1315 **Funding**

1316 This work was supported by an Odysseus Award from the Research Foundation  
1317 Flanders (Fonds Wetenschappelijk Onderzoek; FWO, 90663), the Babraham Institute,  
1318 the Biotechnology and Biological Sciences Research Council (BBSRC,  
1319 BBS/E/B/0000C116, BBS/E/B/000C0402) and The Royal Society (University  
1320 Research Fellowship to H.L.R., UF041311). F.M.D. and C.R.A. were supported by  
1321 studentships from the BBSRC (BBS/E/B/0000L715 and BBS/E/B/0000L726  
1322 respectively). E.L.R. was funded through a Wellcome Trust PhD fellowship  
1323 (Cardiovascular & Disease) and an International scholarship from the KU Leuven  
1324 Faculty of Medicine. SM received a Research Grant from the FWO (1524317N).

1325

1326 **Author contributions:**

1327 Conceptualisation Ideas; E.L.R., F.D., S.M., H.L.R.

1328 Data curation and Formal analysis; E.L.R., F.D., S.M., C.R.A., W.L., H.O., K.A., J.M.A.,

1329 C.K.N., S.C.A., H.L.R.

1330 Investigation; E.L.R., F.D., S.M., C.A., H.O., K.A., J.M.A., C.K.N., W.L., H.L.R.

1331 Writing - Original Draft Preparation; E.L.R., F.D., H.L.R.

1332 Writing - Review & Editing; all authors

1333 Resource provision; O.B., K.A., J.M.A., I.S., K.R.S.

1334 Supervision Oversight and Leadership; S.C.A., I.S., K.R.S., O.B., H.L.R.

1335 **Competing interests**

1336 No conflict of interest to declare.

1337

1338 **Figure Legends**

1339 **Figure 1: Pharmacological and molecular suppression of ERK signalling**

1340 **attenuates IEG induction and hypertrophy in vitro**

1341 **A.** RT-qPCR gene expression analysis for *Nppa/Anf* mRNA in NRVMs +/- 30 min pre-

1342 treatment with PD184352 (PD) +/- 15 min ET-1. N=7. **B.** Cell area ( $\mu\text{m}^2$ ) as a measure

1343 of cardiomyocyte hypertrophy in NRVMs +/- PD +/- ET-1. N=4. **C.** Immunostaining for

1344 Anf (red), sarcomeric alpha-actinin ( $\alpha$ -Act) (green) and nuclear stained with DAPI

1345 (blue) in NRVMs +/- PD +/- ET-1. Quantification (left) represents individual mean data

1346 points for N=4, representative images (right). The scale bar represents 25  $\mu\text{m}$ . **D.** RT-  
1347 qPCR analysis of immediate early genes (IEGs) *c-Jun* and *c-Fos* mRNA expression in  
1348 NRVMs +/- PD +/- ET-1. N=3. **E.** AP-1 luciferase assay as a readout of AP-1  
1349 transcriptional activity in NRVMs +/- PD +/- ET-1 relative to untreated. N=3. **F.** Cell  
1350 area ( $\mu\text{m}^2$ ) measurements for NRVMs infected with either control or DN-Jun (dominant  
1351 negative, kinase dead) adenoviral vectors +/- ET-1. Individual data points are  
1352 represented by N=4. **G.** RT-qPCR analysis of *Nppa/Anf* mRNA expression in NRVMs  
1353 +/- DN-Jun +/- ET-1, N=4.

1354

1355 **Figure S1: IEG induction is activated by acute hypertrophic stimulation and**  
1356 **attenuated by suppression of ERK signalling in vitro**

1357 **A.** RT-qPCR analysis of *Nppb/BNP* mRNA expression in NRVMs 24 h after ET-1  
1358 exposure. N=6. **B.** RT-qPCR gene expression analysis of *JunD*, *FosL* and *FosB* mRNA  
1359 in NRVMs +/- ET-1 treatment for 15 min. N=6. **C.** Schematic diagram of the kinase  
1360 signalling cascade induced by ET-1 stimulation resulting in ERK1/2 activation.  
1361 Pharmacological inhibition of MEK1 by PD184352 (PD) is indicated. **D.** Immunoblot  
1362 analysis for phosphorylated ERK in NRVMs +/- PD +/- ET-1. Left: Representative  
1363 immunoblot for phosphorylated ERK (pERK), normalised to total ERK (T-ERK) and  
1364 sarcomeric  $\alpha$ -Act. Right: Quantitation of relative p-ERK normalised to T-ERK and  $\alpha$ -  
1365 Act. N=5.

1366

1367 **Figure 2: Neurohumoral signalling-induced ERK1/2 activation results in histone**  
1368 **H3S28 phosphorylation at IEG promoter regions**

1369 **A.** Immunoblot analysis of pH3S10 and pH3S28. Left: Representative immunoblots  
1370 from 1 NRVM preparation probing for pH3S10 and pH3S28 in acid extracted histones  
1371 from NRVMs exposed to ET-1 for 0, 10 and 30 min in the presence or absence of PD.  
1372 Right: Levels of phosphorylated histone normalised to total H3 are shown. N=6. **B.**  
1373 Confocal immunofluorescence analysis of pH3S28 in cardiomyocytes in ventricular  
1374 cardiac sections prepared from rats infused with ET-1 or Iso for 15 min. Cardiomyocyte  
1375 nuclei were demarcated by pericentriolar material 1 (Pcm-1; in green) perinuclear  
1376 staining. Nuclei are stained with DAPI (blue) and pH3S28 in magenta. Scale bar = 25  
1377  $\mu$ m. The plot (left) shows quantification of nuclear pH3S28 in Pcm-1 positive nuclei.  
1378 N=4. **C.** RT-qPCR gene expression analysis of IEGs *c-Jun* and *c-Fos* mRNA in left  
1379 ventricular tissue from Wistar rats administered with ET-1 or Iso through jugular vein  
1380 infusion and sacrificed 15 min later. N=7. **D.** Chromatin immunoprecipitation-qPCR  
1381 (ChIP-qPCR) analysis of pH3S28 at IEG promoters, *c-Jun* and *c-Fos* in adult male  
1382 Wistar rats that were administered ET-1 or Iso through jugular vein infusion and  
1383 sacrificed 15 min later. Top: schematic for the site of ChIP primer amplification relative  
1384 to the transcription start sites. Below: quantification of enrichment compared with  
1385 control (untreated) rats. N=3.

1386

1387 **Figure S2: H3 Ser28 phosphorylation is associated with IEG induction and**  
1388 **cardiac hypertrophy**

1389 **A.** RT-qPCR analysis of immediate early genes *JunD*, *FosL1*, *FosB* and of *Smarca4*  
1390 (*Brg1*) mRNA in hearts from adult male Wistar rats that were administered ET-1 or Iso  
1391 through jugular vein administration and sacrificed 15 min later. N7 C, N=8 ET-1, N=6  
1392 Iso. **B.** RT-qPCR expression analysis for cardiac hypertrophy-associated foetal genes  
1393 *Nppa/Anf* and *Nppb/BNP* mRNA in adult male Wistar rats that were administered ET-1

1394 or Iso through jugular vein administration and sacrificed 15 min later. N= 7 C, N=8 ET-  
1395 1, N=6 Iso.

1396

1397 **Figure 3: Activated MSK is required for H3 Ser28 phosphorylation and Brg-1-**  
1398 **driven IEG induction in cardiomyocytes**

1399 **A.** Immunoblot showing levels of phosphorylated (activated) MSK in NRVMs +/- PD +/-  
1400 ET-1, normalised to  $\alpha$ Act as a loading control. Left: Representative immunoblot. Right:  
1401 Quantification of pMSK relative to control vehicle treated cells. N=5. **B.** Confocal  
1402 immunofluorescence analysis of pMSK in cardiomyocytes in ventricular cardiac  
1403 sections prepared from rats infused with ET-1 or Iso for 15 min. Cardiomyocyte nuclei  
1404 were demarcated by pericentriolar material 1 (Pcm-1; in magenta) perinuclear staining.  
1405 Nuclei are stained with DAPI (blue) and pMSK in green. Left: Quantification of nuclear  
1406 pMSK in Pcm-1 positive nuclei. N=4. Right: Confocal images of heart sections from  
1407 animals treated as indicated. Scale bar = 20  $\mu$ m. **C.** Representative confocal images  
1408 of immunostained NRVMs showing expression of FLAG-tagged WT-MSK and DN-  
1409 MSK adenoviruses (AdV). Nuclei are stained with DAPI (blue, Beta-Actin in green and  
1410 FLAG-tagged MSK in red. **D.** Immunoblotting for pMSK, pERK and FLAG-tagged MSK  
1411 AdV in NRVMs infected with either empty vector (EV), WT-MSK1 AdV or DN-MSK1  
1412 AdV and treated +/- 15 min with ET-1, normalised to  $\alpha$ -Act as a loading control. Left:  
1413 Representative immunoblot. Right: Quantification of immunoblot, relative to EV. N=5.  
1414 **E.** Immunoblotting for phosphorylated histone H3S28 in NRVMs infected with either  
1415 empty vector (EV), WT-MSK1 AdV or DN-MSK1 AdV treated +/- 15 min with ET-1,  
1416 normalised to total Histone 3 (T-H3) as a loading control. Left: Representative  
1417 immunoblot. Right: Quantification of immunoblot data. N=6. **F.** Effect of DN-MSK  
1418 expression on *c-Fos* expression in NRVM treated with ET-1 for 10 min. *c-Fos*



1419 expression was determined by RT-qPCR. Data is presented relative to empty vector.  
1420 N = 6-10. **G.** Analysis of hypertrophic responses in NRVMs infected with EV or DN-  
1421 MSK1 AdV treated +/- ET-1 for 24 h. Left: RT-qPCR expression analysis of *Nppa/Anf*  
1422 mRNA in NRVMs. Data is presented relative to EV untreated cells. N=4. Right: Cell  
1423 area ( $\mu\text{m}^2$ ) as a measure of hypertrophy in NRVMs. N=4. **H.** ChIP-qPCR analysis for  
1424 pH3S28 abundance at *c-Jun* (left) and *c-Fos* gene promoter regions in NRVMs infected  
1425 with EV or DN-MSK1 AdV +/- ET-1 for 10 min. Top: schematic for the site of ChIP  
1426 primer amplification relative to the transcription start sites. Below: quantification of  
1427 enrichment compared with EV AdV untreated NRVMs. N=4. **I.** ChIP-qPCR analysis for  
1428 Brg1 enrichment at *c-Jun* (left) and *c-Fos* gene promoter regions in NRVMs infected  
1429 with EV or DN-MSK1 AdV +/- ET-1 for 10 min. Quantification of Brg1 enrichment at the  
1430 *c-Jun* (Left) and *c-Fos* (Right) promoters compared with EV AdV untreated NRVMs.  
1431 N=4. **J.** ChIP-qPCR for Brg1 at the *c-Jun* and *c-Fos* gene promoters (left-right) in left  
1432 ventricular tissue from adult male Wistar rats that were administered ET-1 or Iso  
1433 through jugular vein administration and sacrificed 15 min later. N=3.

1434

1435 **Figure S3: IEG activation is a conserved feature of hypertrophy in adult**  
1436 **cardiomyocytes**

1437 **A.** Confocal images of immunostained ARVMs infected with adenovirus expressing  
1438 FLAG-tagged DN-Msk (kinase dead). ARVMs are stained for FLAG (green), pH3S28  
1439 (red) and  $\beta$ -Act (purple). FLAG-tagged DN-Msk is enriched in the nuclei in ARVMs. **B.**  
1440 RT-qPCR analysis of *c-Fos* (Top) and *Nppa/Anf* (Bottom) mRNA in ARVMs infected  
1441 with EV or DN-MSK1 +/- ET-1 treatment for 15 min. N=4. Scale bar = 25  $\mu\text{m}$ . **C.**  
1442 Analysis of siRNA-mediated knockdown of *Msk1* in NRVMs. RT-qPCR analysis of  
1443 *Msk1* mRNA expression in NRVMs transfected with scr or siMsk siRNA is shown. **D.**



1444 RT-qPCR analysis of *c-Fos* mRNA in NRVMs transfected with scr or siMsk siRNA +/-  
1445 ET-1 for 15 min. N=4. **E.** RT-qPCR analysis of *Nppa/Anf* mRNA expression in NRVMs  
1446 transfected with scr or siMsk siRNA +/- ET-1 for 15 min. N=4. **F.** Analysis of *Smarca4*  
1447 knockdown in NRVMs. *Smarca4/Brg1* mRNA abundance was measured by RT-qPCR  
1448 in NRVMs transfected with siRNA targeting Smarca3 (siBrg1) and compared with  
1449 NRVMs transfected with scrambled control (scr) siRNA. N=3. **G.** RT-qPCR analysis of  
1450 *Myh6/Myh7* (Left) and *c-Fos* (Right) mRNA expression in NRVMs transfected with scr  
1451 or siBrg1 siRNA +/- ET-1 for 15 min. N=5. **I.** ChIP-qPCR for pH3S28 at the *c-Fos*  
1452 promoter region in NRVMs transfected with scr or siMsk siRNA +/- ET-1 for 15 min.  
1453 N=5.

1454

1455 **Figure 4: Genetic MSK inhibition attenuates IEG activation and cardiomyocyte**  
1456 **hypertrophy in vivo**

1457 **A.** RT-qPCR analysis of *Msk1* (Left) and *Msk2* (Right) mRNA expression in left  
1458 ventricle from *Msk1/2* KO mice and wild type littermates +/- Iso infusion for 1 week.  
1459 N=5, WT Iso, N=4, KO ctrl, N=5, KO Iso, N=5. **B.** RT-qPCR analysis of expression of  
1460 IEGs *c-Jun* (Left) and *c-Fos* (Right) in left ventricle from *Msk1/2* KO mice and wild type  
1461 littermates +/- Iso infusion for 1 week. WT ctrl, N=5, WT Iso, N=4, KO ctrl, N=5, KO  
1462 Iso, N=5. **C.** RT-qPCR analysis of *Smarca4/Brg1* mRNA expression in left ventricle  
1463 from *Msk1/2* KO mice and wild type littermates +/- Iso infusion for 1 week. N=5, WT  
1464 Iso, N=4, KO ctrl, N=5, KO Iso, N=5. **D.** Immunostaining for pMSK in cardiomyocyte  
1465 nuclei in left ventricular cardiac sections in *Msk1/2* KO mice and wild type littermates  
1466 +/- Iso infusion for 1 week. Cardiomyocyte nuclei are demarcated with Nesprin. Left:  
1467 Quantification of pMSK in Nesprin+ve nuclei. Right: Representative immunostaining  
1468 images for pMSK (green), Nesprin (red) and nuclei are stained with DAPI (blue). N=4.

1469 Scale bar = 50  $\mu$ m. **E.** Immunostaining for pH3S28 in cardiomyocyte nuclei in left  
1470 ventricular cardiac sections in *Msk1/2* KO mice and wild type littermates +/- Iso infusion  
1471 for 1 week. Cardiomyocyte nuclei are demarcated with Pcm-1. Left: Quantification of  
1472 pH3S28 in Pcm-1+ve nuclei. Right: Representative immunostaining images for  
1473 pH3S28 (red), Pcm-1 (green) and nuclei are stained with DAPI (blue). N=4. Scale bar  
1474 = 50  $\mu$ m. **F.** Fractional shortening in *Msk1/2* KO mice and wild type littermates at  
1475 baseline (Iso=0) and +/- Iso infusion for 1 week (Iso=1), derived from 2D  
1476 echocardiography data. WT ctrl, N=6, WT Iso, N=4, KO ctrl, N=5, KO Iso, N=6. **G.**  
1477 Posterior wall dimension in diastole in *Msk1/2* KO mice and wild type littermates at  
1478 Iso=0 and +/- Iso=1, derived from 2D echocardiography data. WT ctrl, N=6, WT Iso,  
1479 N=4, KO ctrl, N=5, KO Iso, N=6. **H.** RT-qPCR analysis of the markers of pathological  
1480 hypertrophy *Nppa/Anf*, *Nppb/Bnp* and *Myh7* mRNA expression in left ventricle from  
1481 *Msk1/2* KO mice and wild type littermates +/- Iso infusion for 1 week. N=5, WT Iso,  
1482 N=4, KO ctrl, N=5, KO Iso, N=5. **I.** Quantification of left ventricular interstitial fibrosis,  
1483 measured as percentage (%) area of extracellular matrix from Picro Sirius Red staining  
1484 in left ventricular tissue from *Msk1/2* KO mice and wild type littermates +/- Iso infusion  
1485 for 1 week. N=5, WT Iso, N=4, KO ctrl, N=5, KO Iso, N=5. **J.** RT-qPCR analysis of  
1486 *Col1a1* mRNA expression in left ventricular tissue from *Msk1/2* KO mice and wild type  
1487 littermates +/- Iso infusion for 1 week. WT ctrl, N=5, WT Iso, N=4, KO ctrl, N=5, KO  
1488 Iso, N=5.

1489

1490 **Figure S4: Genetic MSK inhibition attenuates IEG activation and cardiomyocyte**  
1491 **hypertrophy in vivo**

1492 **A.** Heat map showing expression of immediate early gene (*c-Jun*, *c-Fos*, *FosL1*, *FosB*,  
1493 *JunD*), *Smarca4/Brg1*, *Erk1/2* and *Msk1/2* in left ventricular Pcm-1+ve cardiomyocyte

1494 RNA-seq data in models of pathological (Ascending aortic banding, AB) or  
1495 physiological (treadmill training, run) in male Sprague Dawley rats. Data extracted from  
1496 (Thienpont et al., 2017). **B.** RT-qPCR analysis of *Msk1* and *Msk2* mRNA expression  
1497 in NRVMs treated with ET-1 for 15 min. N=5. **C.** Representative M-mode  
1498 echocardiogram from WT/*Msk* KO mice +/- Iso for 1 week. Echocardiographic  
1499 measurements indicated. IVSd=Interventricular septal dimension end systole,  
1500 IVSd=Interventricular septal dimension end diastole, LVDs=Left ventricle diameter end  
1501 systole, LVDd=Left ventricular diameter end diastole, PWd=posterior wall dimension  
1502 end diastole, PWs=posterior wall dimension end systole. **D.** Representative left  
1503 ventricular tissue sections from WT/*Msk* KO mice +/- Iso for 1 week showing Picro  
1504 sirius red staining for collagen. The scale bar indicates 50  $\mu$ m. **E.** Terminal  
1505 deoxynucleotidyl transferase dUTP nick end labelling (TUNEL) staining of left  
1506 ventricular cardiac sections in *Msk1/2* KO mice and wild type littermates +/- Iso infusion  
1507 for 1 week. TUNEL assay measures fragmented DNA as a mark of apoptosis. Left:  
1508 Quantification of TUNEL in cardiac nuclei. Right: Representative immunostaining  
1509 images for TUNEL (green) and nuclei are stained with DAPI (blue). N=3. The scale bar  
1510 indicates 20  $\mu$ m. **F.** RT-qPCR analysis of pro-apoptotic marker genes caspase 3  
1511 (Casp3), caspase 9 (Casp9) mRNA expression in left ventricle from *Msk1/2* KO mice  
1512 and wild type littermates +/- Iso infusion for 1 week. WT ctrl, N=5, WT Iso, N=4, KO  
1513 ctrl, N=5, KO Iso, N=5. **G.** RT-qPCR analysis of the expression of the anti-apoptotic  
1514 marker gene *Bcl2* mRNA expression in left ventricle from *Msk1/2* KO mice and wild  
1515 type littermates +/- Iso infusion for 1 week. WT ctrl, N=5, WT Iso, N=4, KO ctrl, N=5,  
1516 KO Iso, N=5.

1517

1518 **Figure 5: The MAPK-MSK-pH3S28 axis is conserved in the hypertrophic**  
1519 **response in humans.**

1520 **A.** Confocal immunofluorescence analysis of pH3S28 in isolated human donor  
1521 cardiomyocytes treated for 15 min with ET-1 or Iso +/- PD. Left: Quantification of  
1522 immunostaining of nuclear pH3S28. Right: Representative images of isolated  
1523 cardiomyocytes stained for pH3S28 (red),  $\alpha$ -Act (cyan), nuclei stained with DAPI  
1524 (blue). N=4. Scale bar = 20  $\mu$ m. **B.** Confocal immunofluorescence analysis of pMSK in  
1525 isolated cardiomyocytes treated for 15 min with ET-1 or Iso +/- PD. Left: Quantification of immunostaining of nuclear pMSK. Right:  
1526 Representative images of isolated cardiomyocytes stained for pMSK (green),  $\alpha$ -Act  
1527 (purple), nuclei stained with DAPI (blue). N=4. Scale bar = 20  $\mu$ m. **C-E.** RT-qPCR  
1528 analysis of mRNA expression of indicated genes in human hypertrophic left ventricular  
1529 tissue (H) compared with non-failing (C). C, N=5, H, N=4. **C.** RT-qPCR analysis of  
1530 *MSK1* and *MSK2* mRNA expression. **D.** RT-qPCR analysis of expression of immediate  
1531 early gene components of the AP-1 transcription factor. **E.** RT-qPCR analysis of  
1532 *SMARCA4 (BRG-1)*. **F.** ChIP-qPCR analysis for pH3S28 enrichment at the *c-JUN* and  
1533 *c-FOS* promoters in Pcm-1 +ve cardiomyocyte nuclei from human hypertrophic left  
1534 ventricular tissue (H) compared with non-failing (C). N=3. **G.** ChIP-qPCR for pH3S28  
1535 enrichment at the *SMARCA4/BRG-1* promoter in Pcm-1 +ve cardiomyocyte nuclei  
1536 from human hypertrophic left ventricular tissue (H) compared with non-failing (C). N=3.

1538

1539 **Figure 6: Summary cartoon of main findings of this study indicating pathway by**  
1540 **which MSK couples GPCR activation with IEG induction during the cardiac**  
1541 **hypertrophic response**

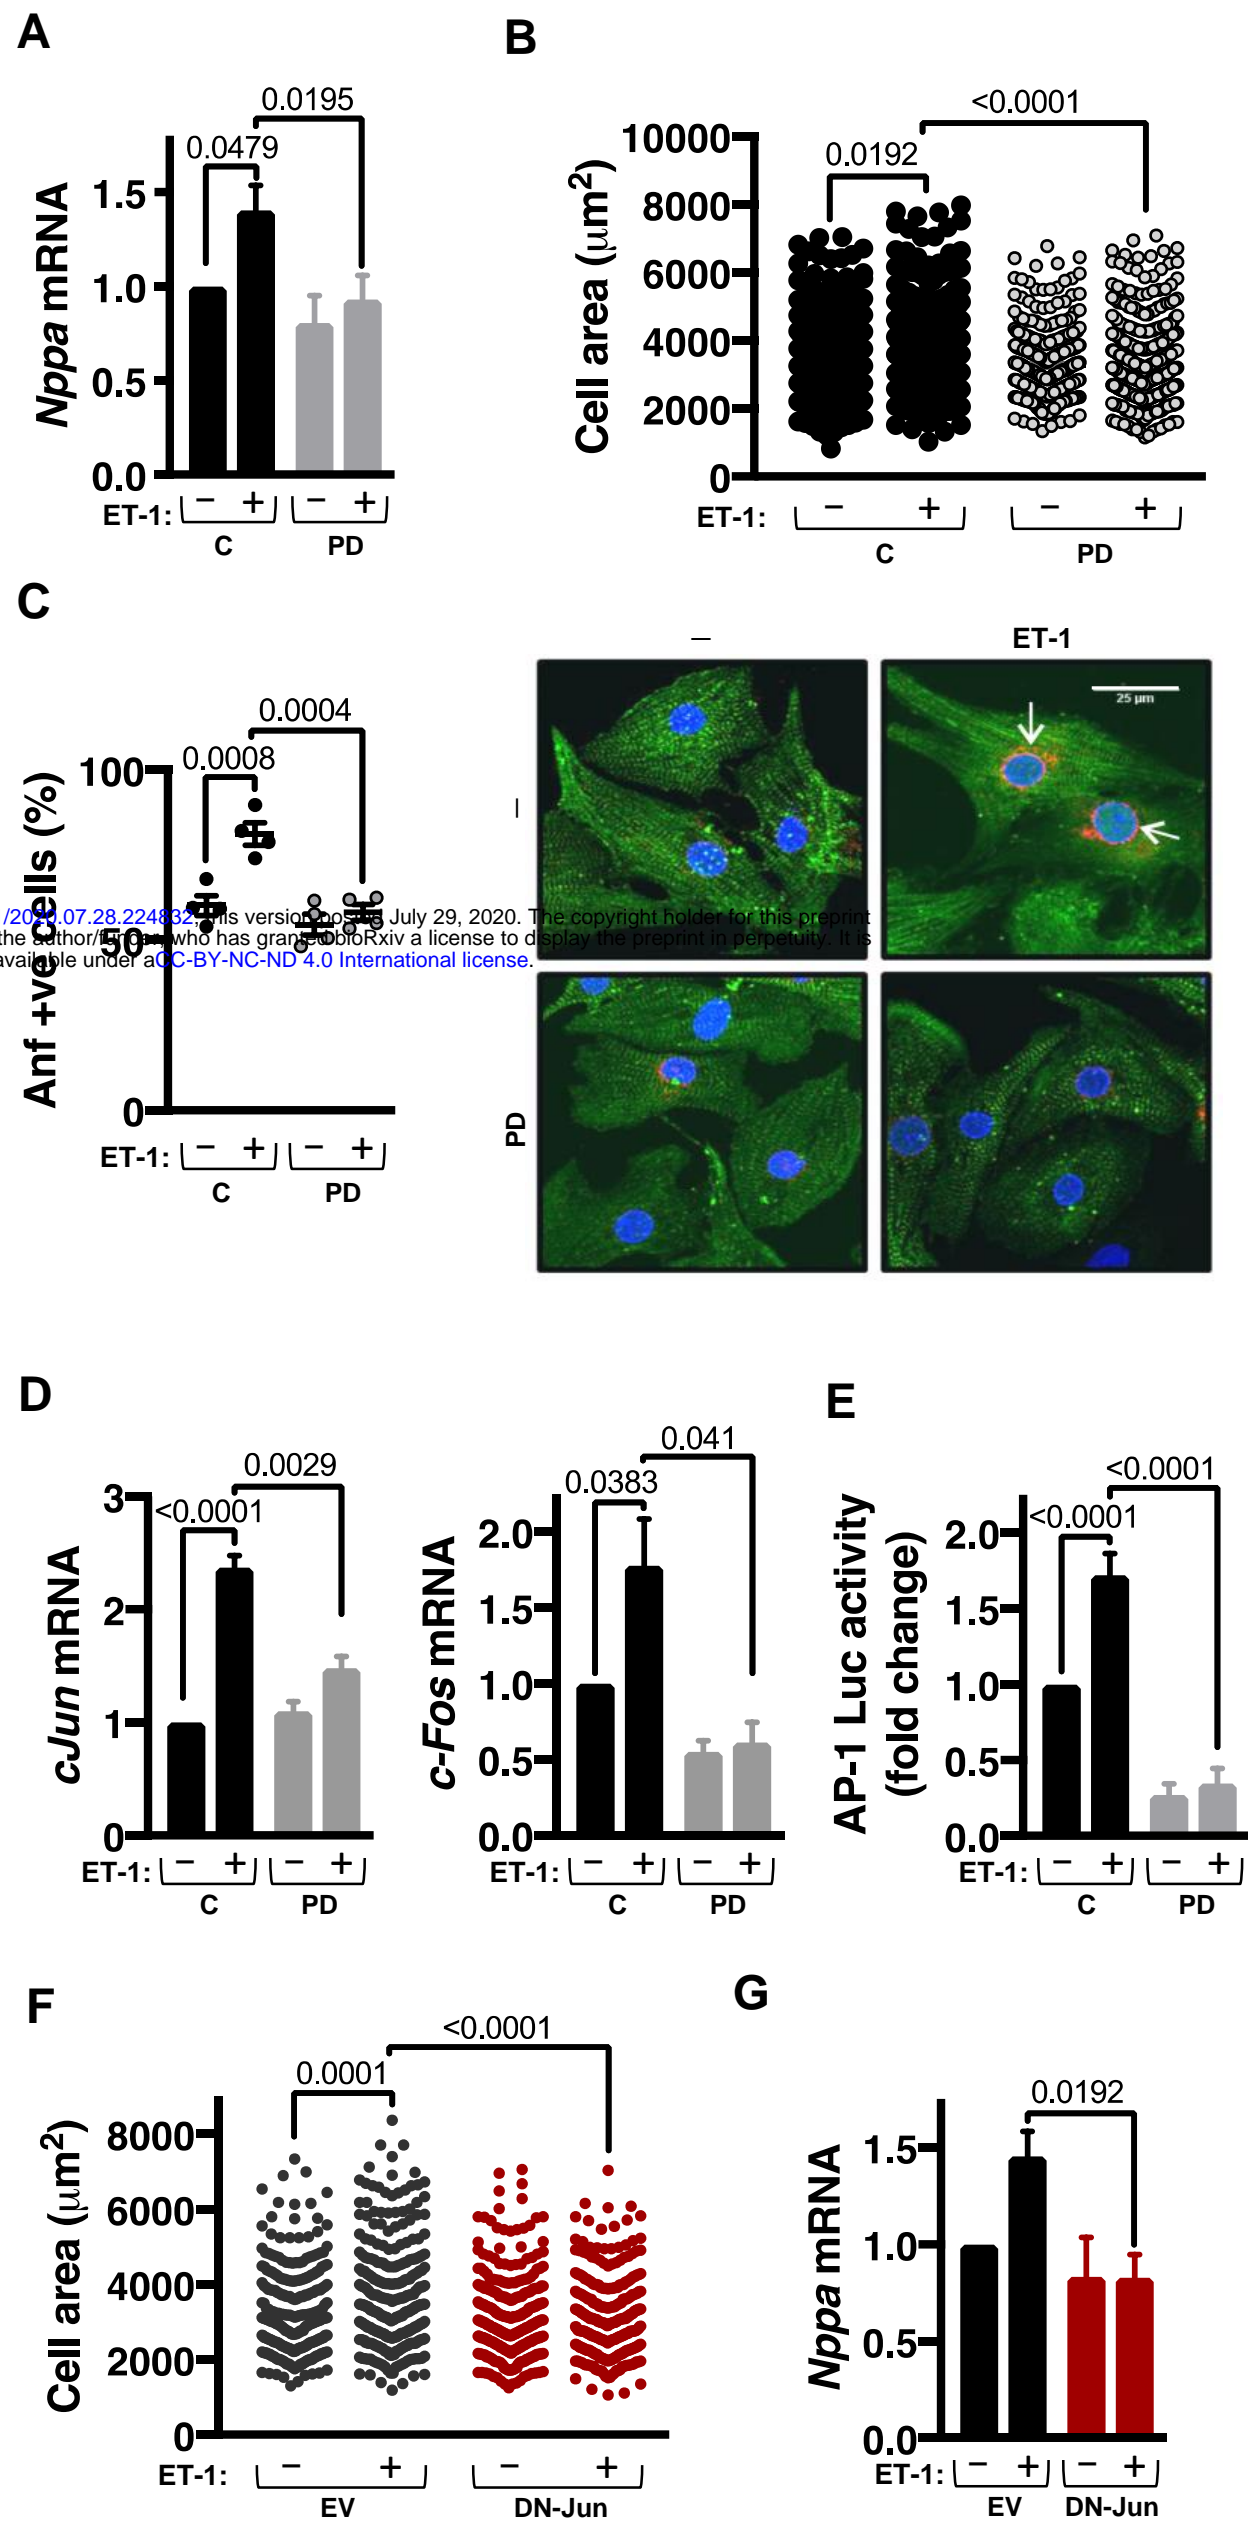

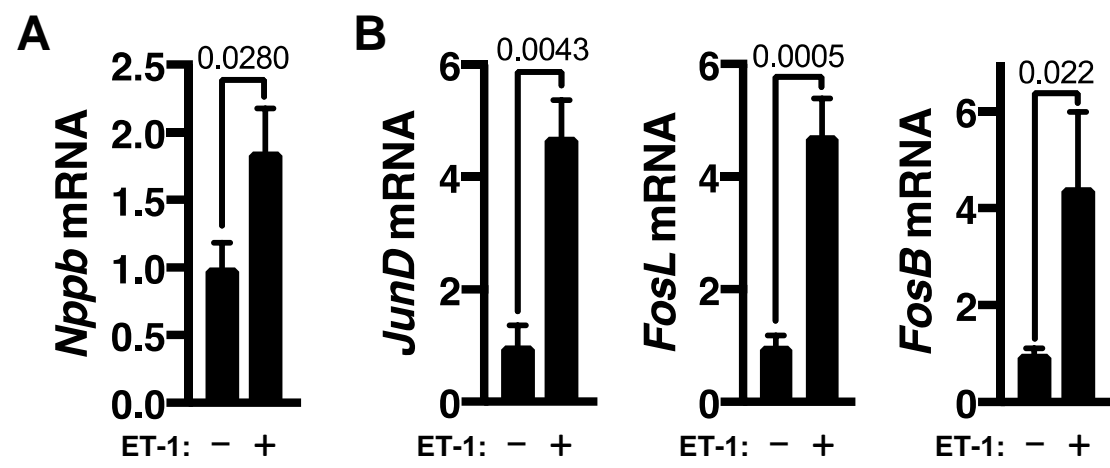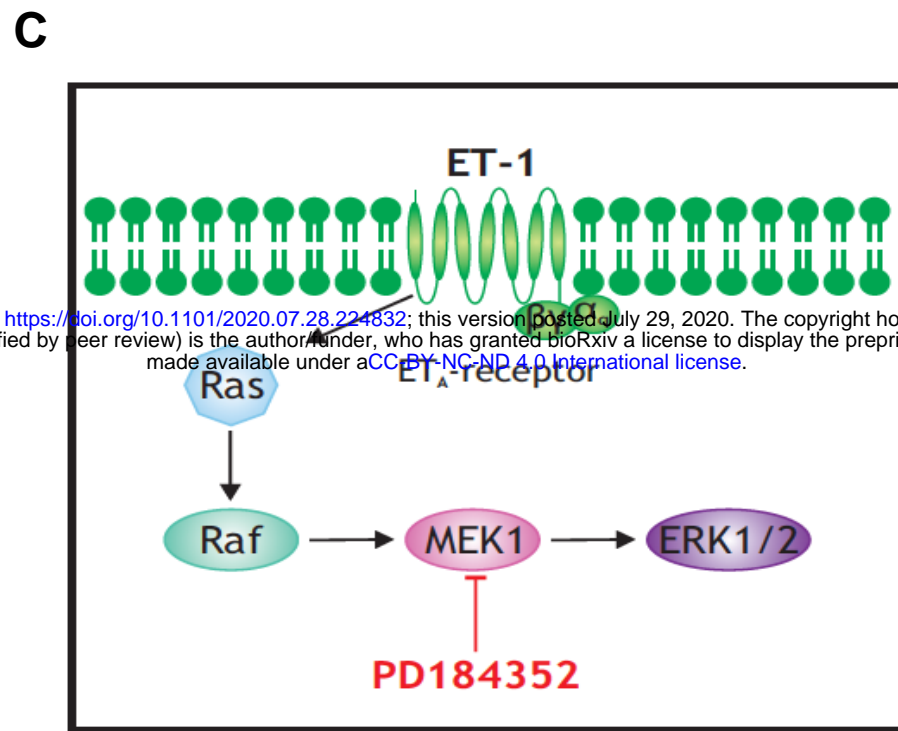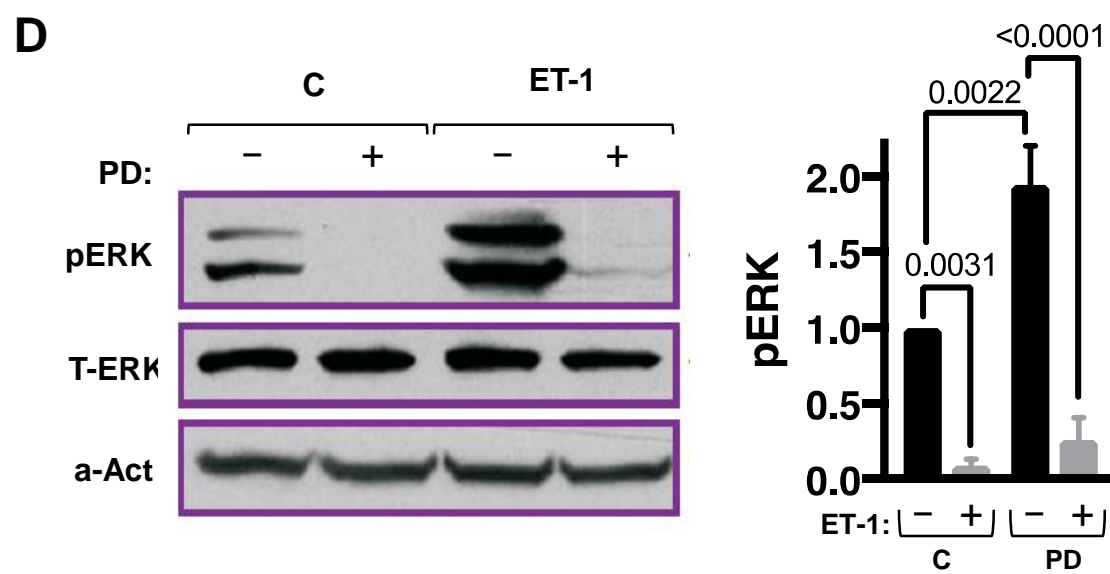



**A**

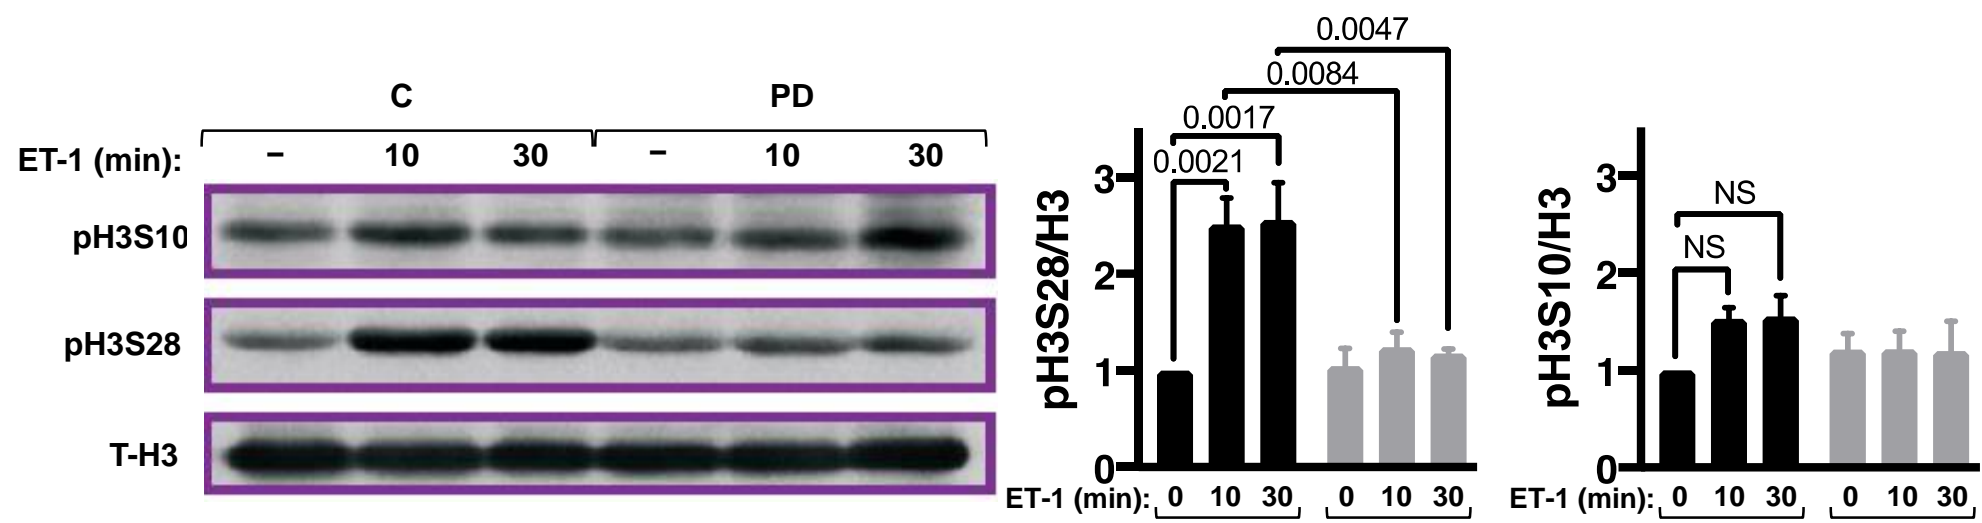

**B**

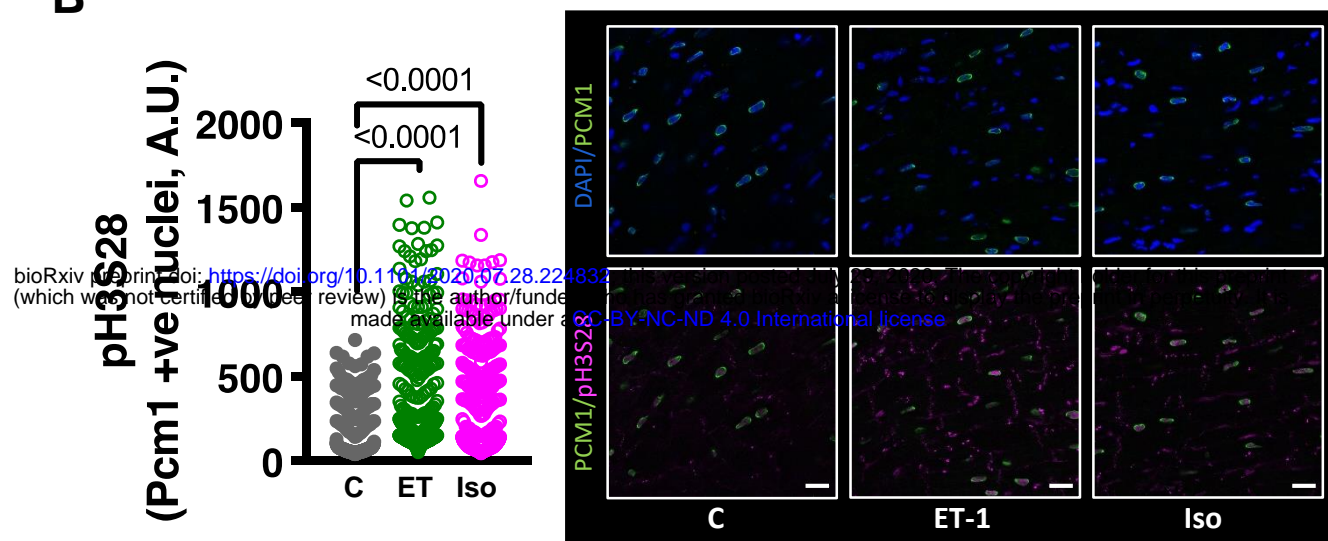

**C**

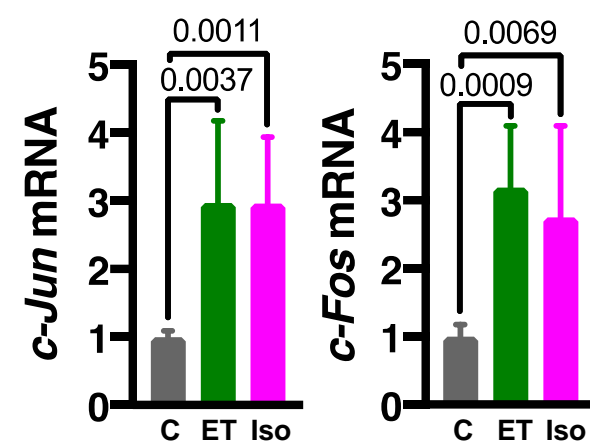

**D**

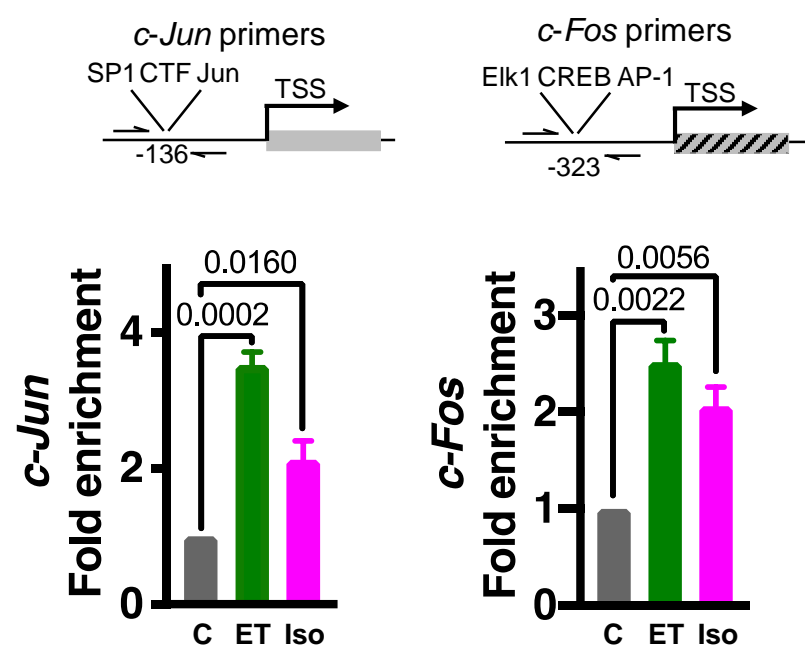

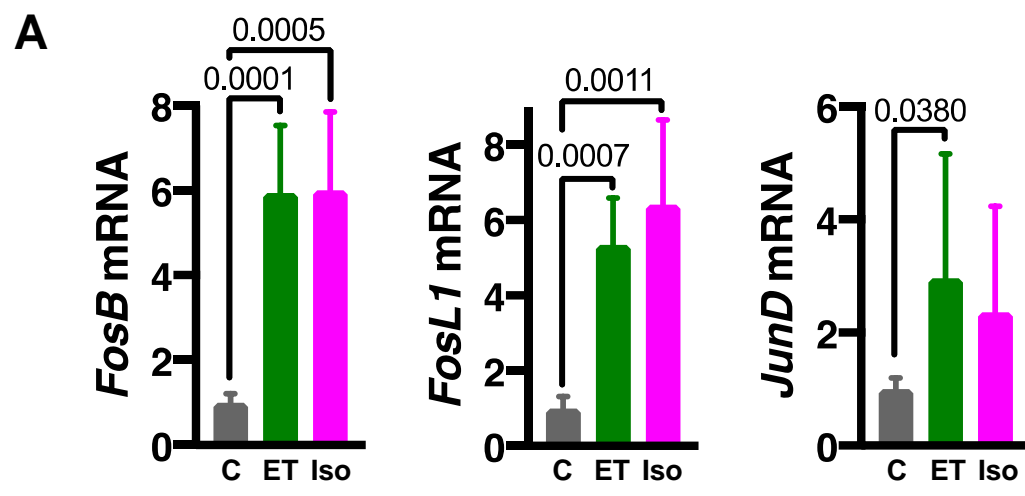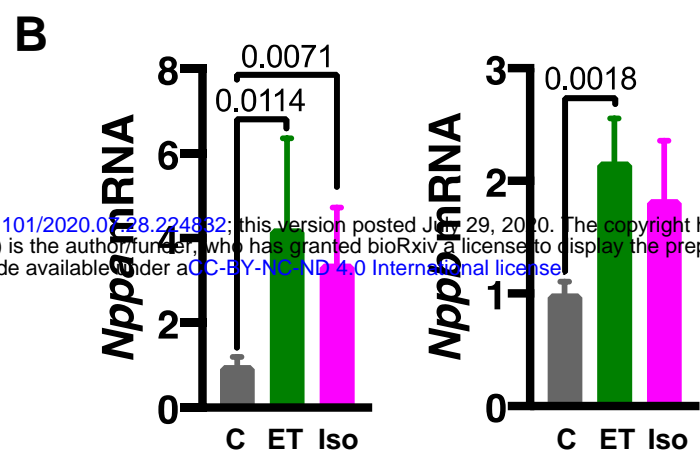

bioRxiv preprint doi: <https://doi.org/10.1101/2020.07.28.224832>; this version posted July 29, 2020. The copyright holder for this preprint (which was not certified by peer review) is the author/funder, who has granted bioRxiv a license to display the preprint in perpetuity. It is made available under aCC-BY-NC-ND 4.0 International license.



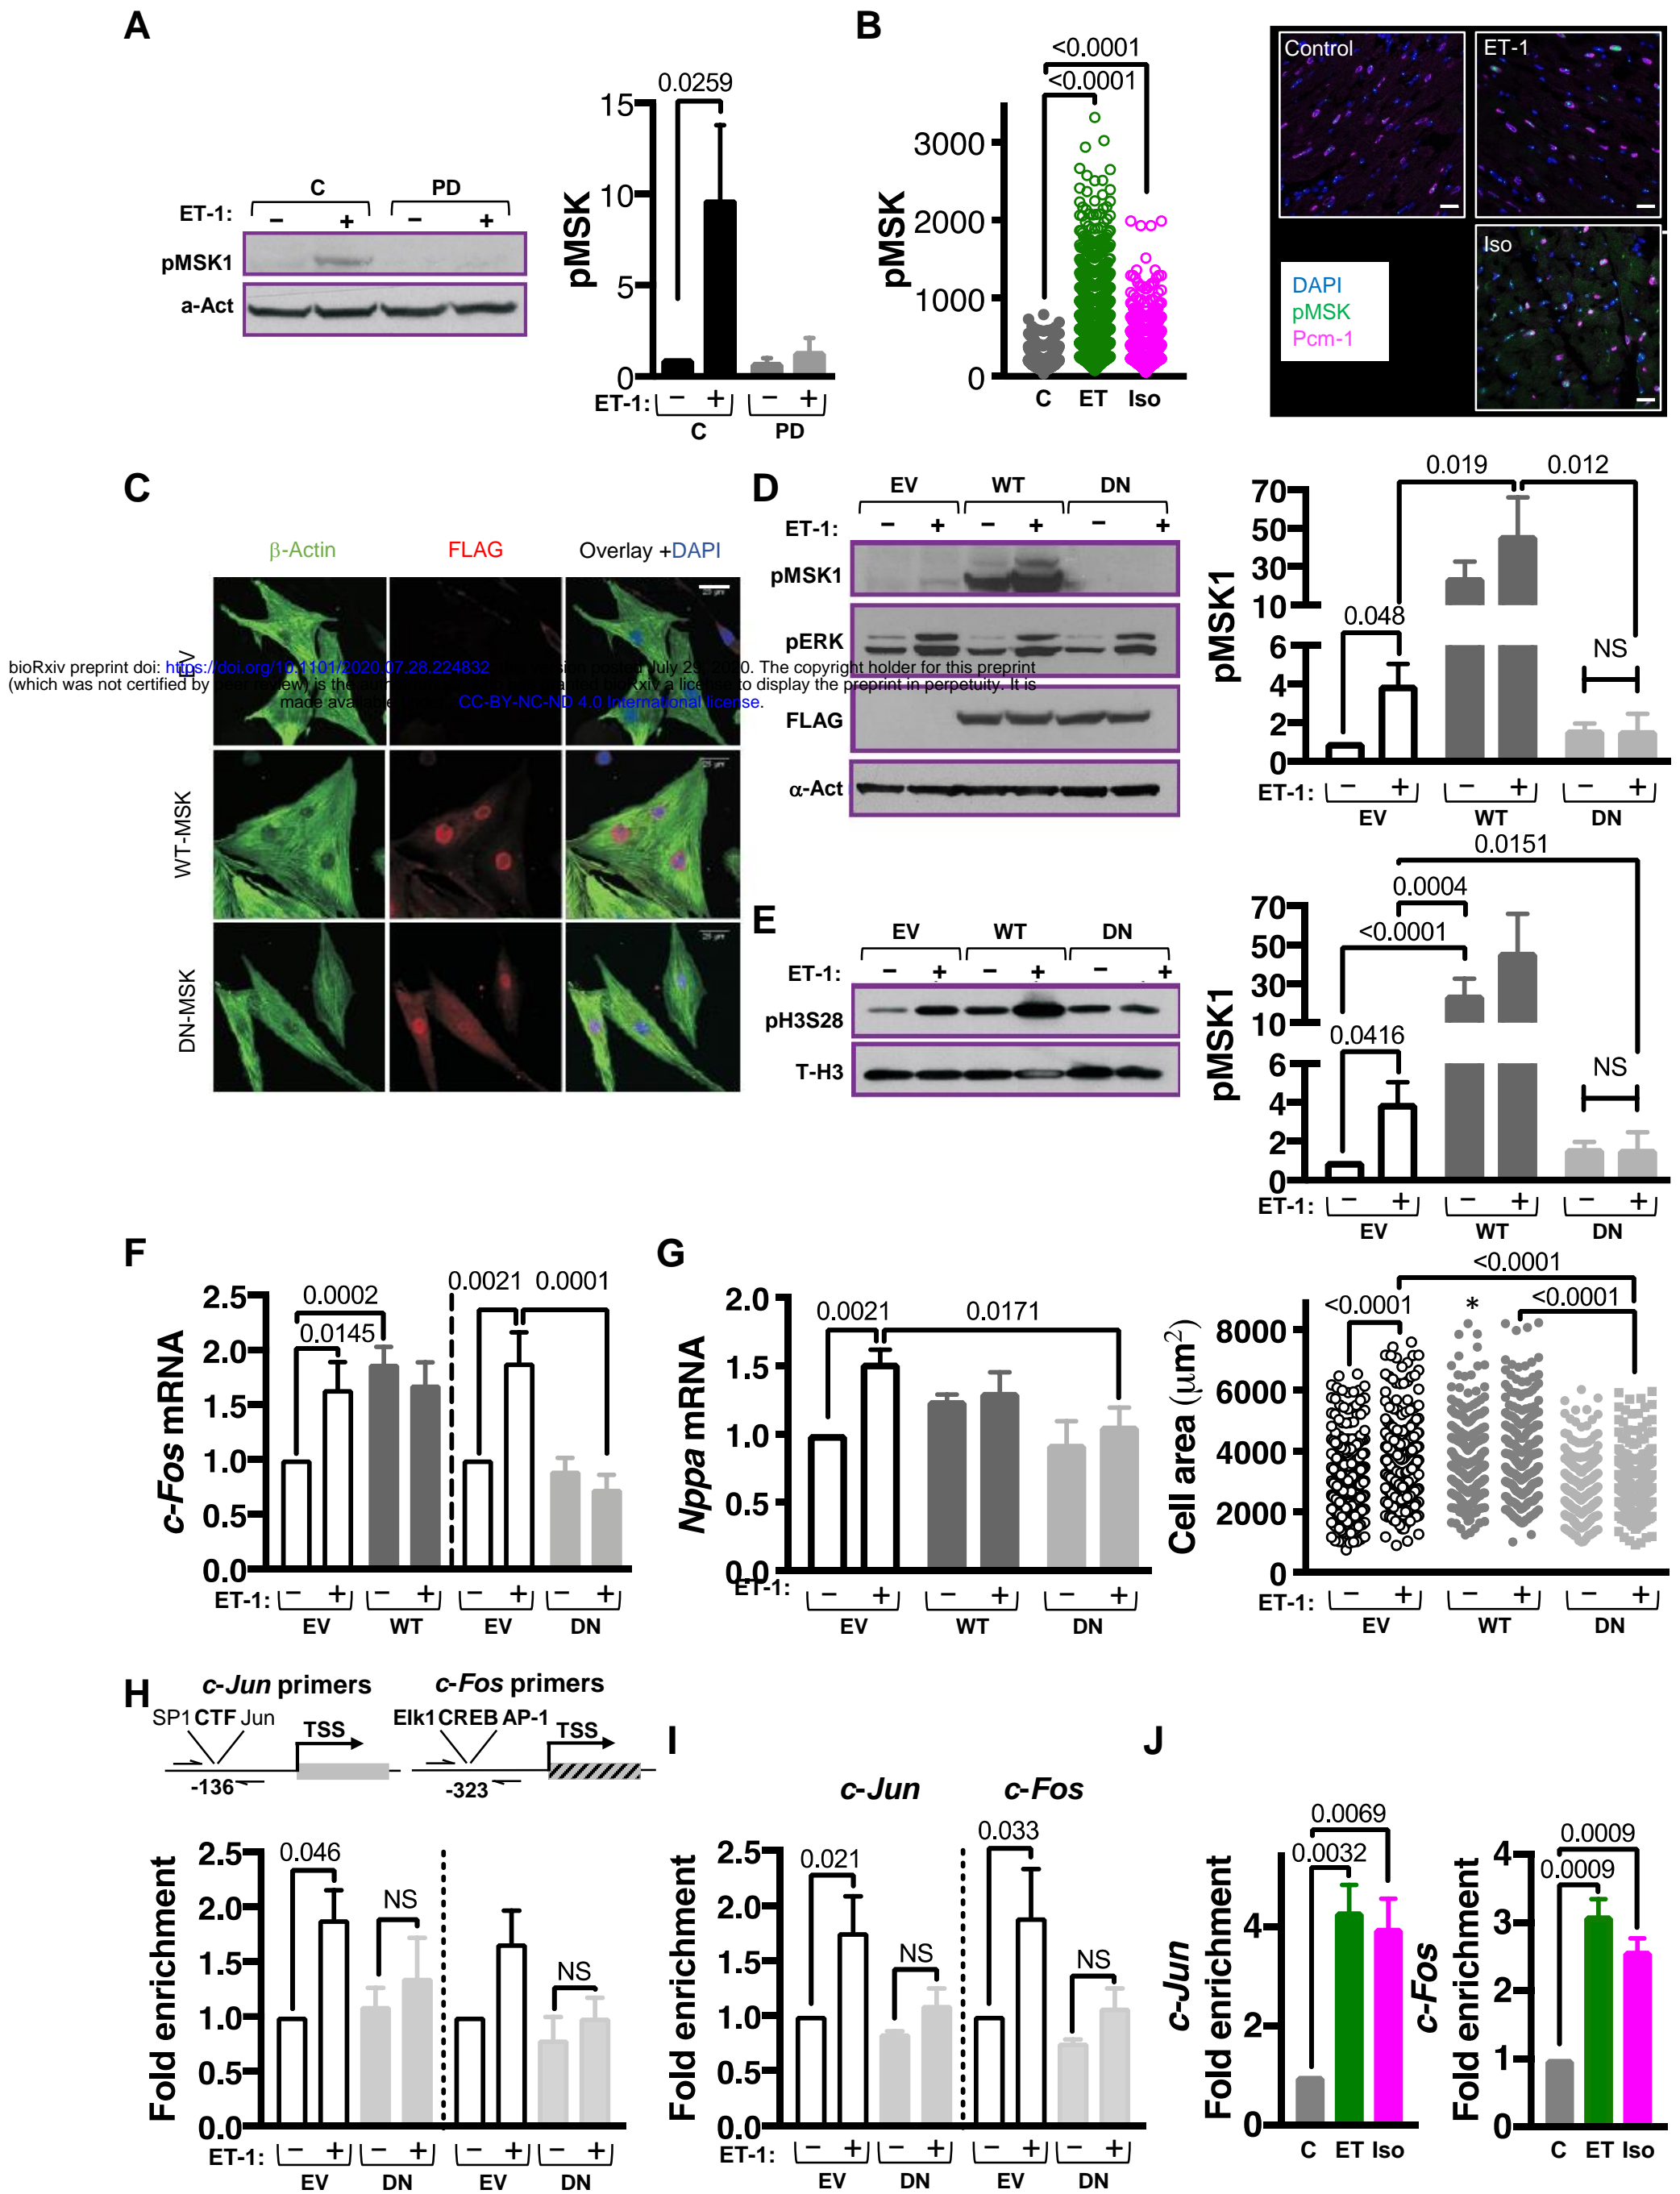

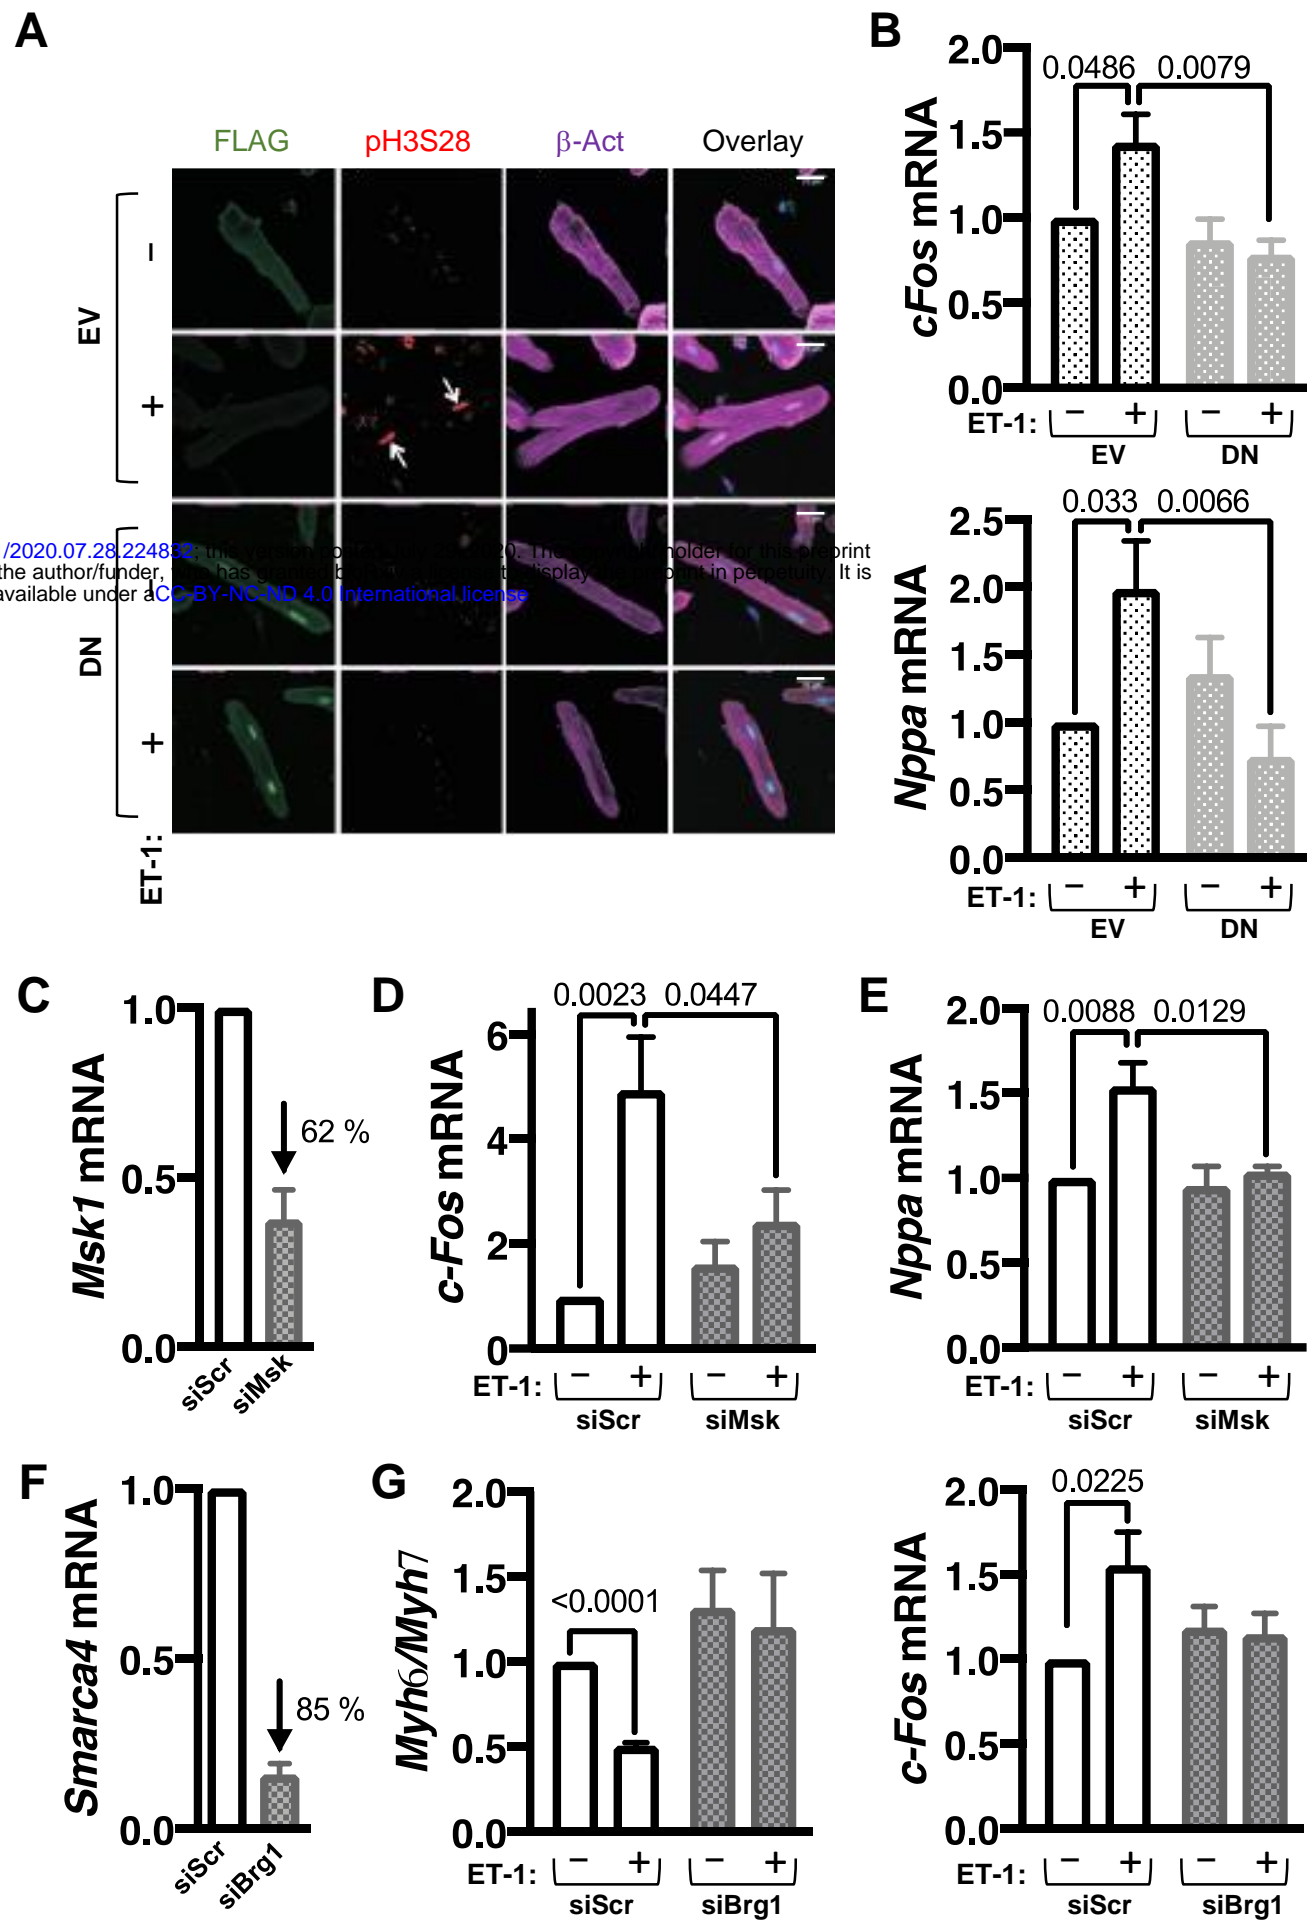

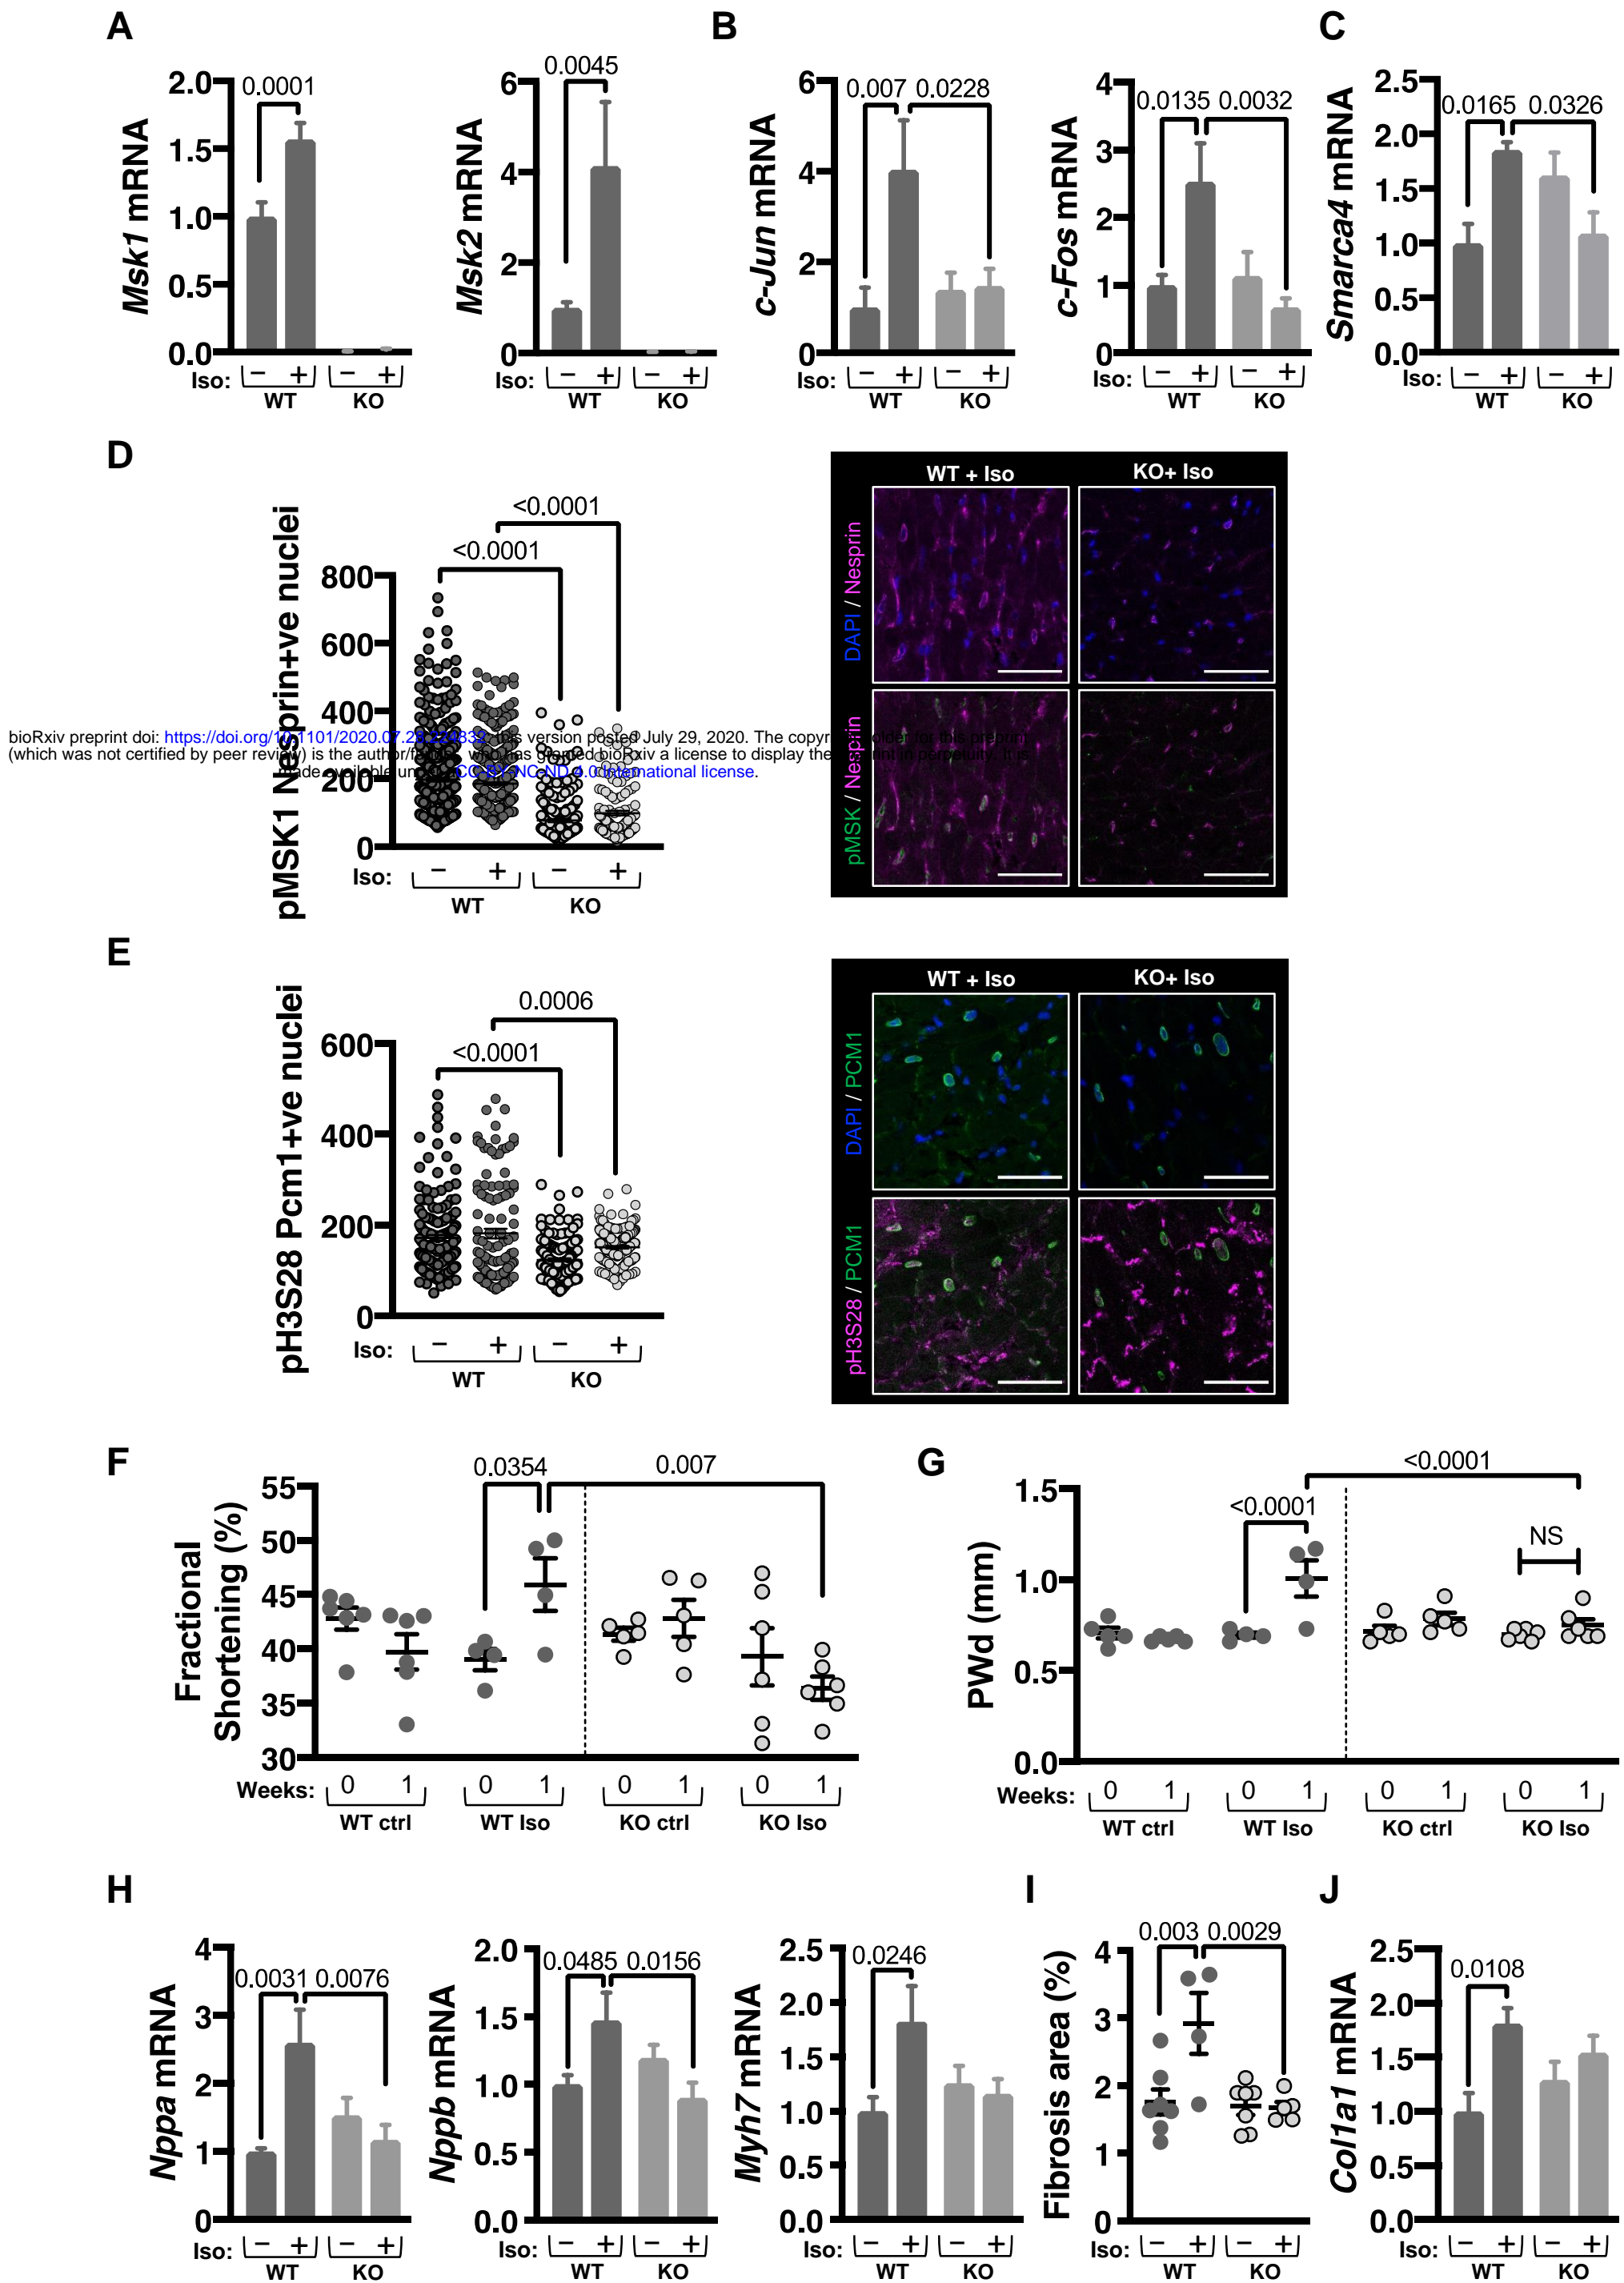



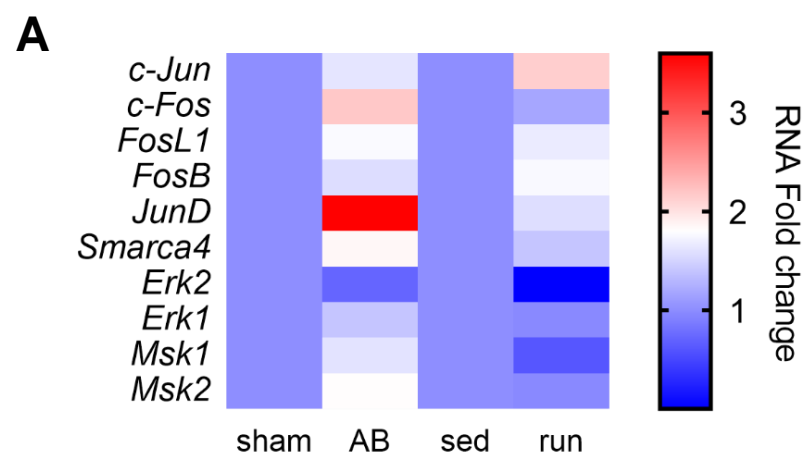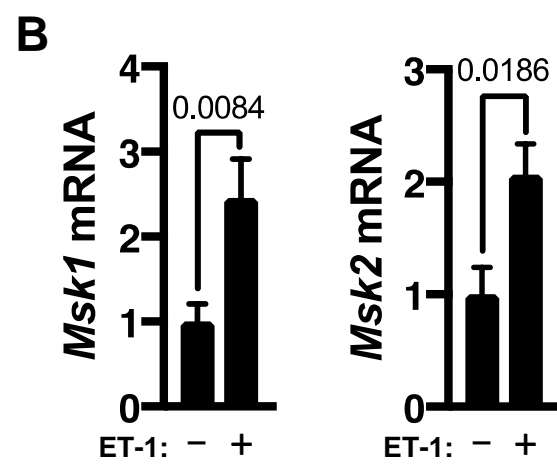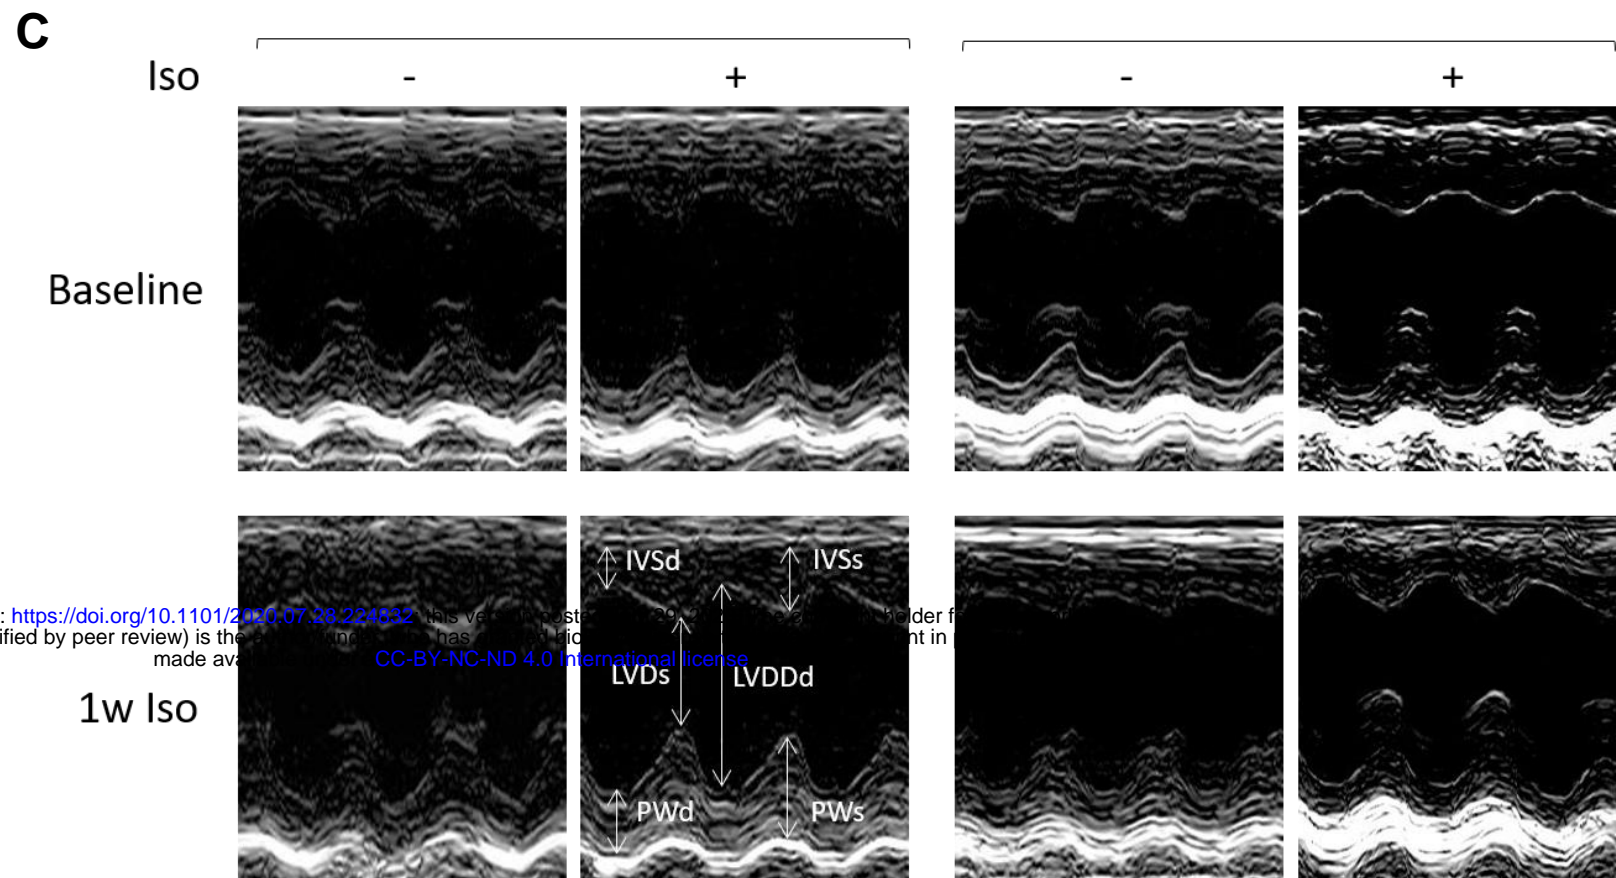

bioRxiv preprint doi: <https://doi.org/10.1101/2020.07.28.224832>; this version posted August 11, 2020. The copyright holder for this preprint (which was not certified by peer review) is the author/funder, who has granted bioRxiv a license to display the preprint in perpetuity. It is made available under aCC-BY-NC-ND 4.0 International license.

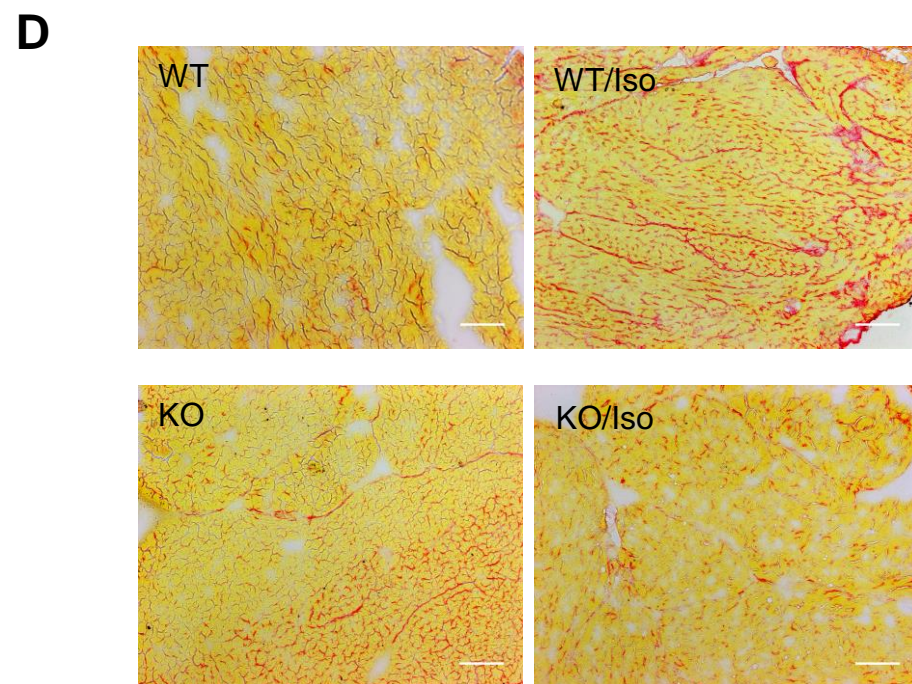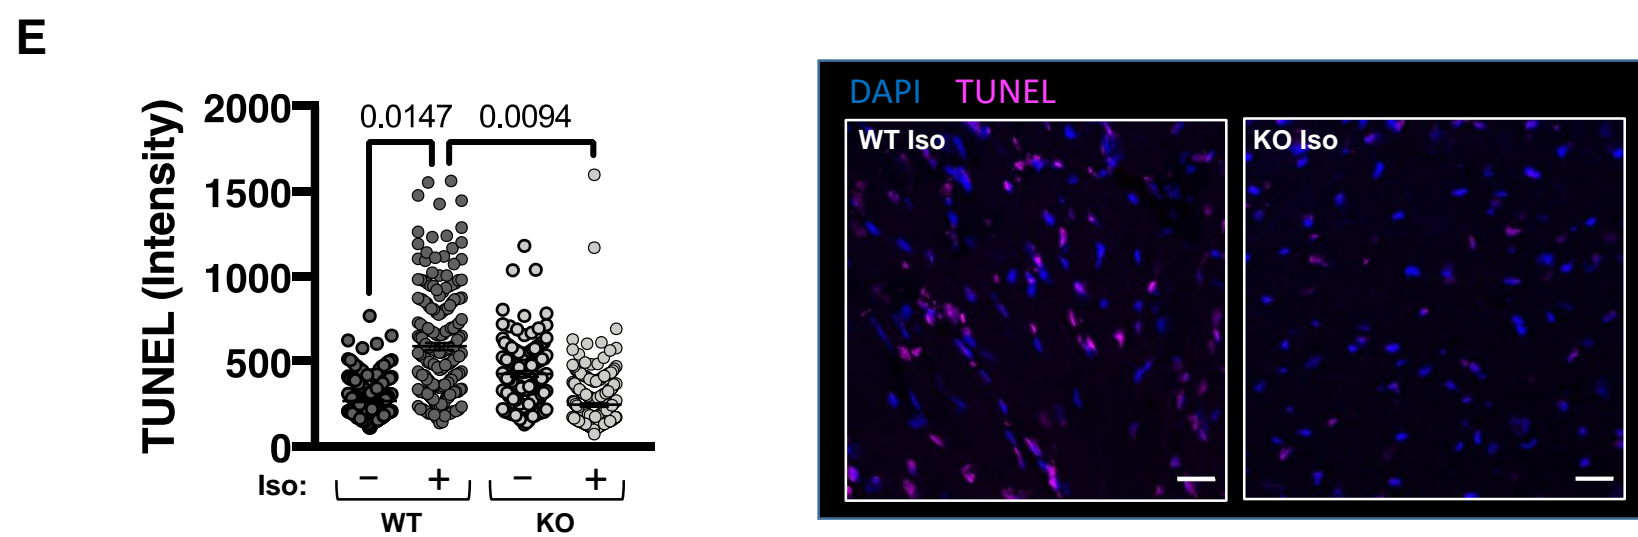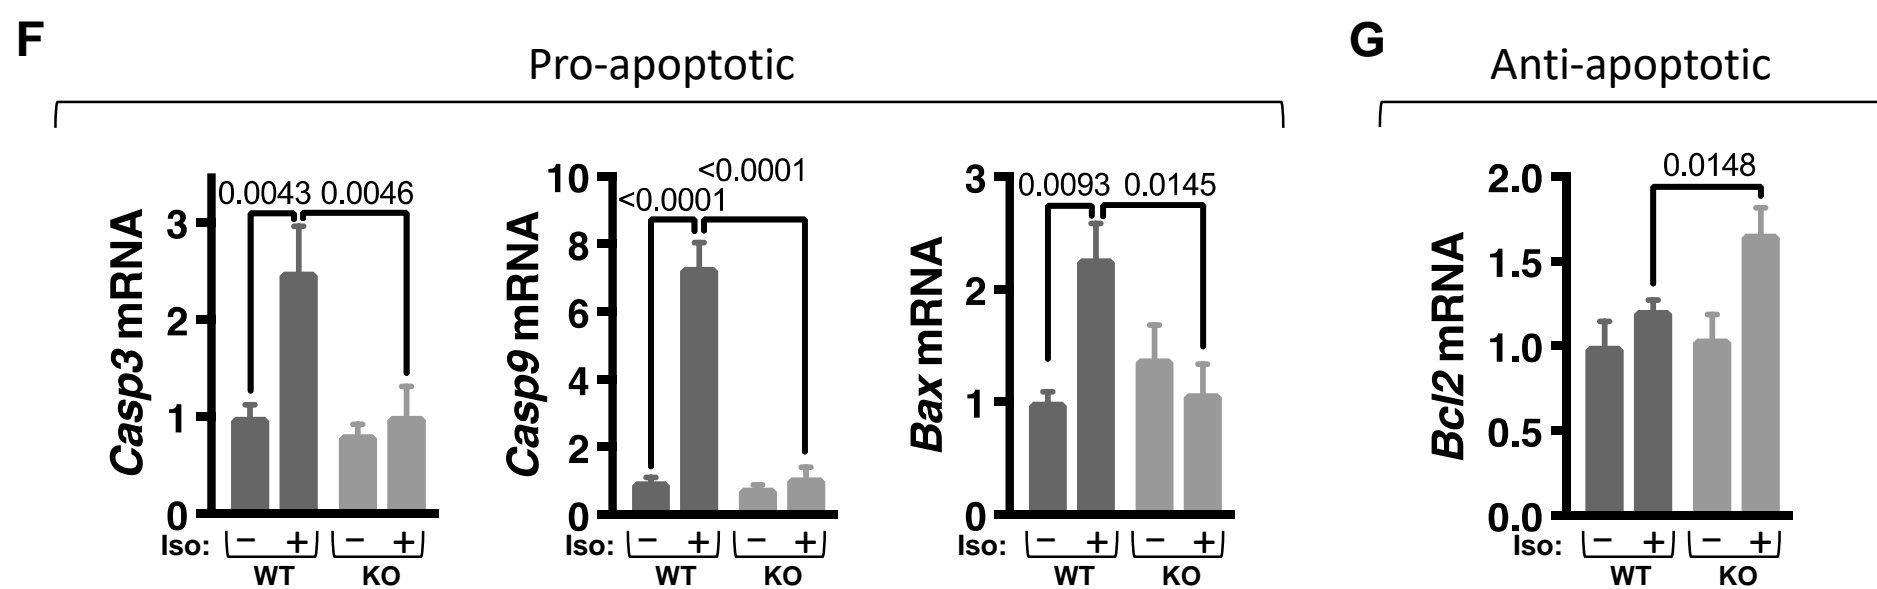

**A**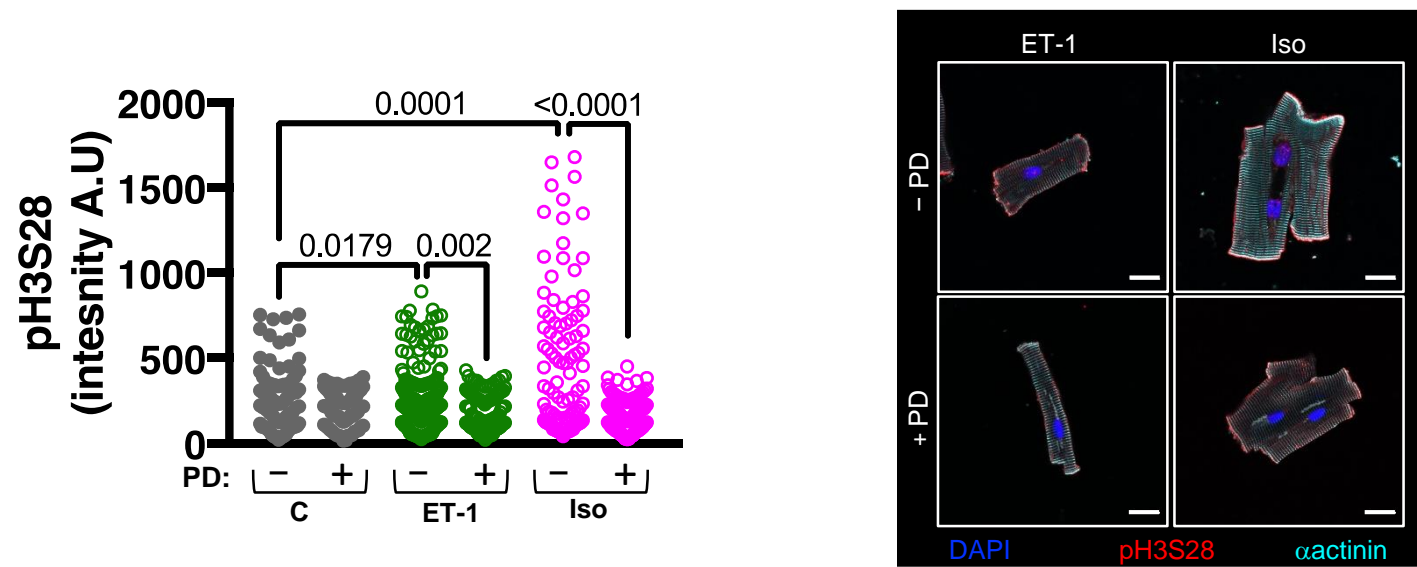**B**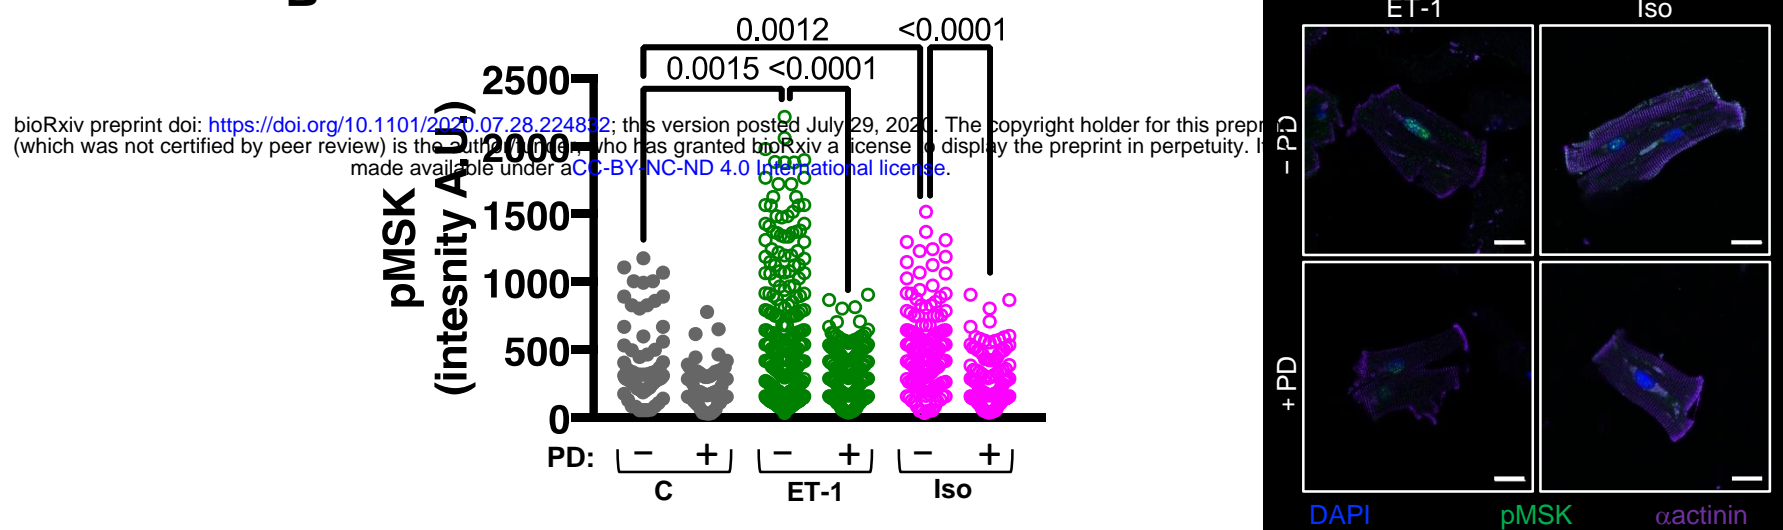

bioRxiv preprint doi: <https://doi.org/10.1101/2020.07.28.224832>; this version posted July 29, 2020. The copyright holder for this preprint (which was not certified by peer review) is the author/funder, who has granted bioRxiv a license to display the preprint in perpetuity. It is made available under aCC-BY-NC-ND 4.0 International license.

**C**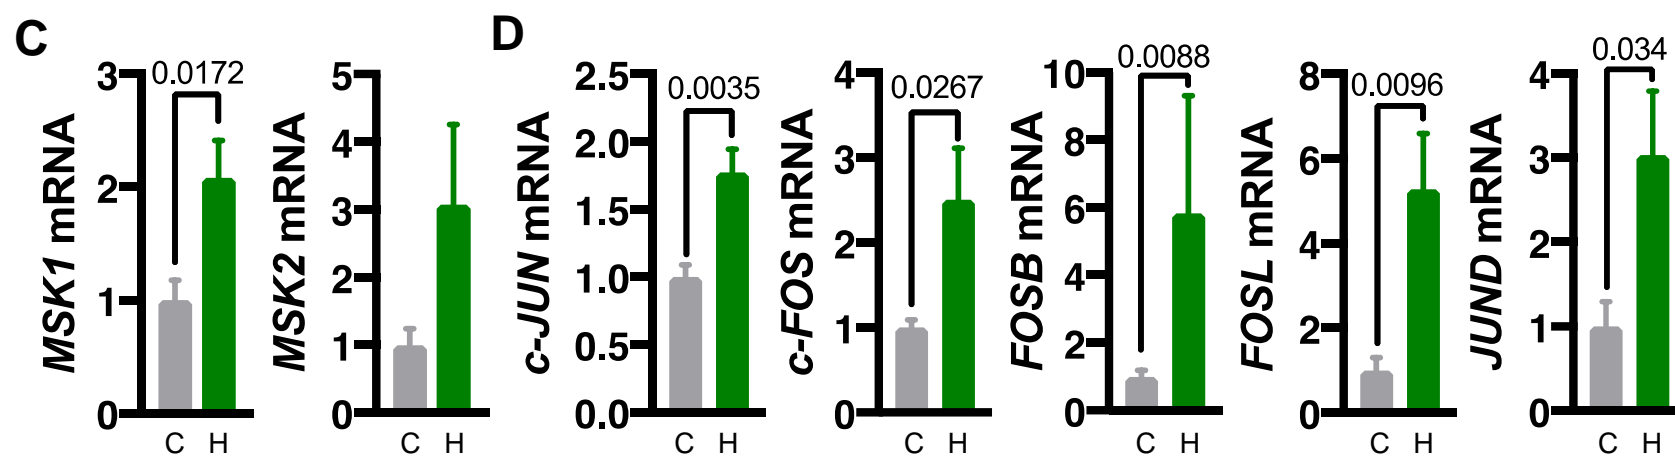**D**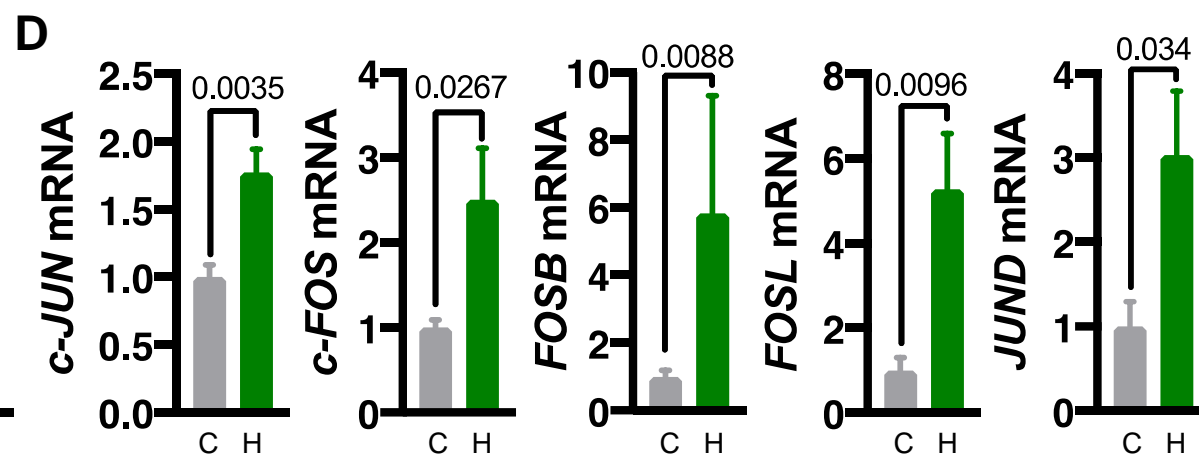**E**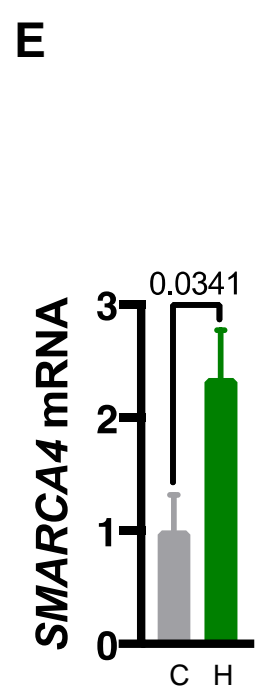**F**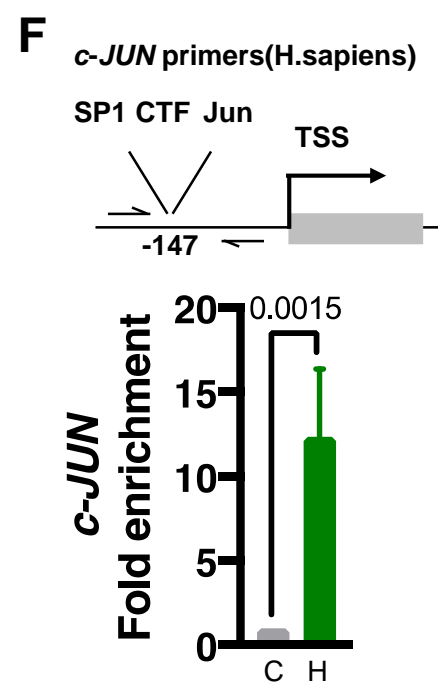**G**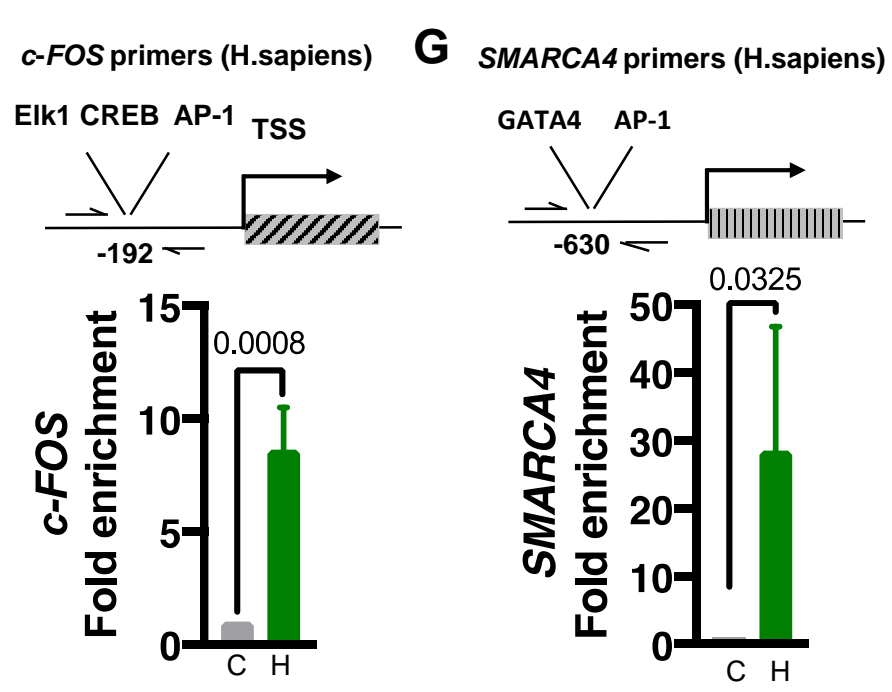



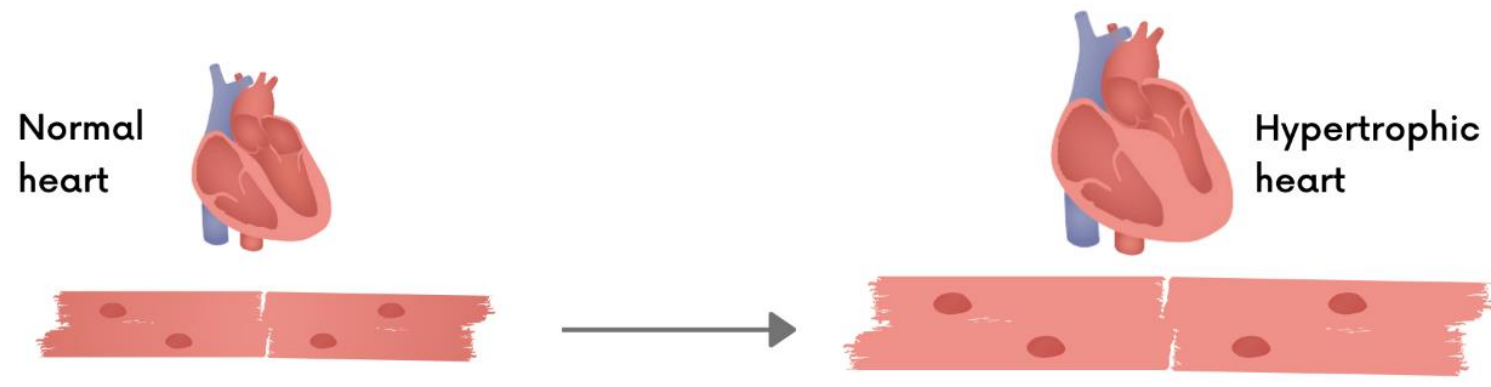

Hypertrophic stimulus

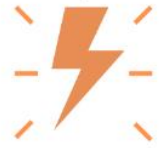

Plasma membrane

bioRxiv preprint doi: <https://doi.org/10.1101/2020.07.28.224832>; this version posted July 29, 2020. The copyright holder for this preprint (which was not certified by peer review) is the author/funder, who has granted bioRxiv a license to display the preprint in perpetuity. It is made available under aCC-BY-NC-ND 4.0 International license.

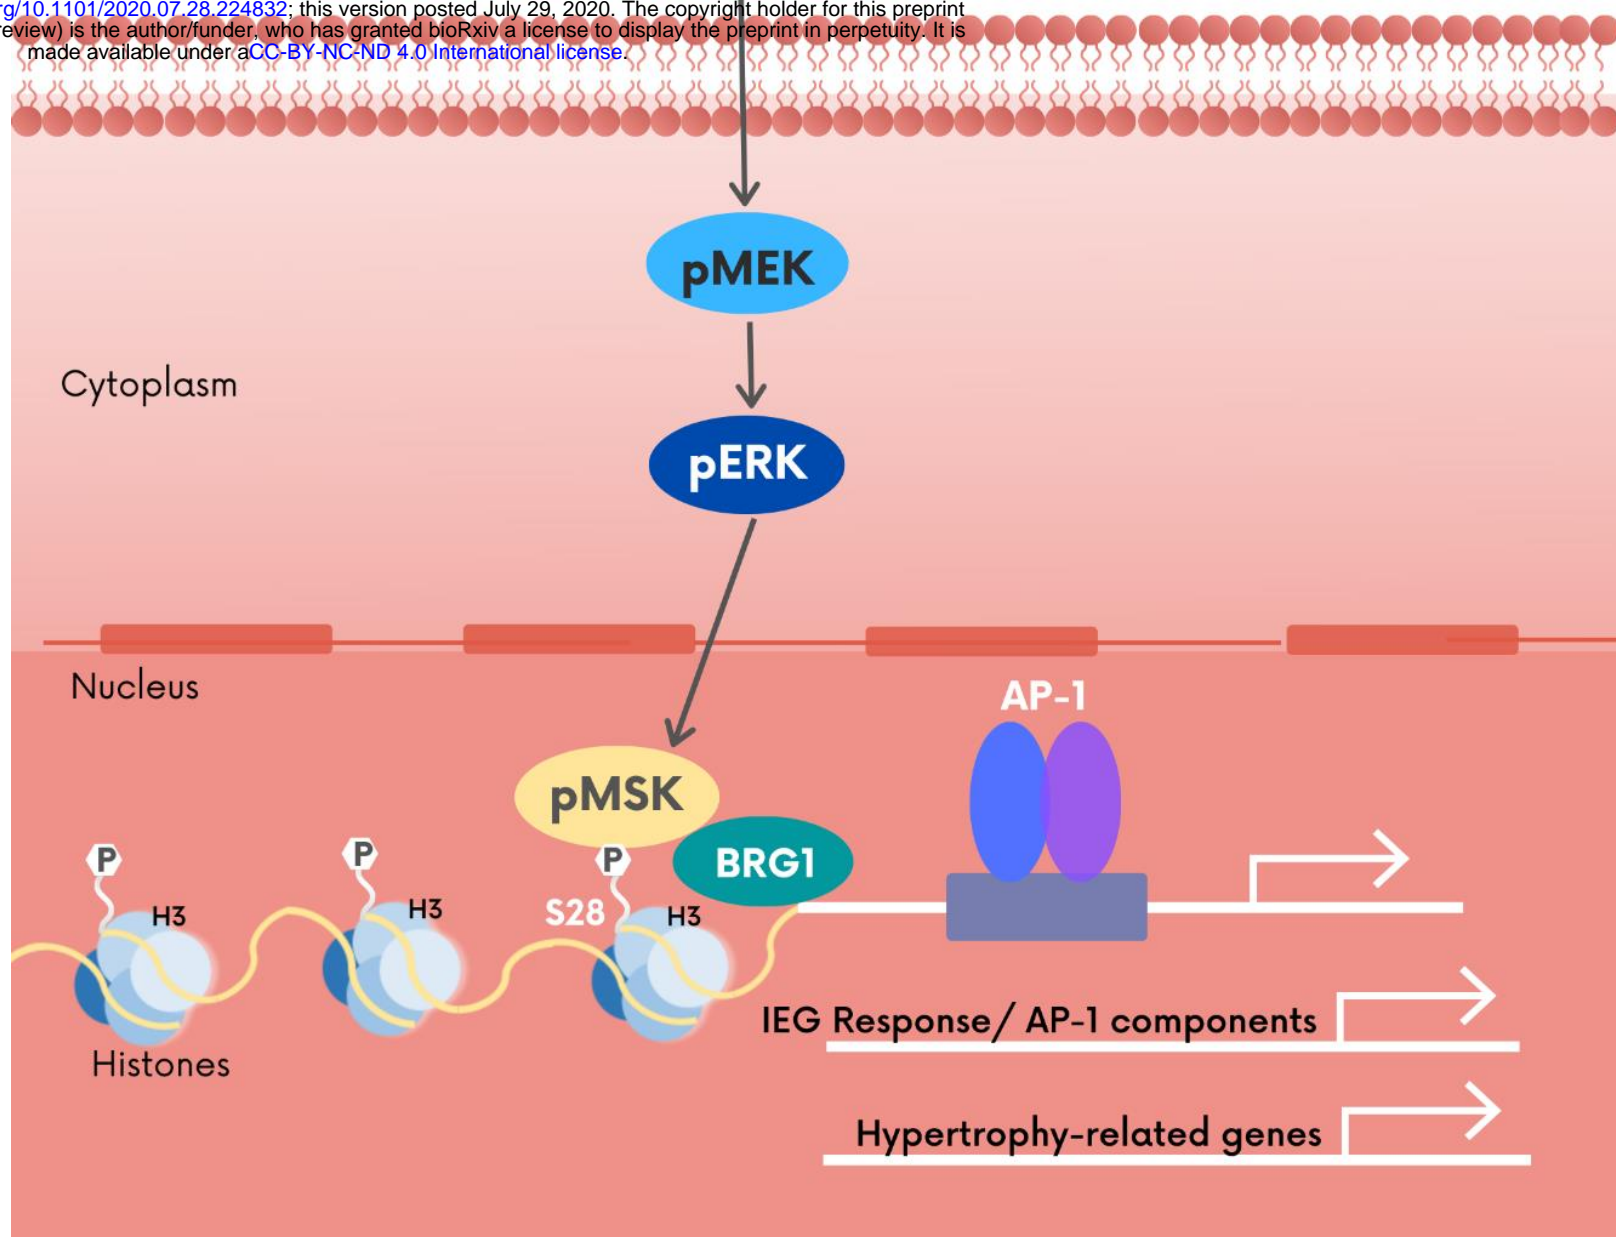

1 **Supplementary Data**

2 **Table S1: Human healthy donor samples for cardiomyocyte isolation**

| Patient | Age | Sex | BMI | Medications                                      |
|---------|-----|-----|-----|--------------------------------------------------|
| HD-13   | 78  | F   | 23  | Antidiuretics, Insulin, corticosteroids          |
| HD-19   | 57  | F   | 23  | Noradrenalin, Insulin, corticosteroids, T3       |
| HD-20   | 74  | F   | 31  | Antibiotics, corticosteroids                     |
| HD-30   | 73  | F   | 23  | Noradrenalin, Dopamine, Insulin, corticosteroids |

3 Samples used in Table S1 were used to generate data in Figures 5A-B.

4 **Table S2: Human control and hypertrophic left ventricular cardiomyocyte**

5 **nuclei**

| Sample I.D. | Age (yrs) | B.M.I. | Heart Mass (g) | Pathology/Cause of Death                             |
|-------------|-----------|--------|----------------|------------------------------------------------------|
| ND231       | 57        | 21.9   | 320            | Control/multiple injuries, fall down from 4th floor. |
| ND241       | 43        | 32.2   | 590            | left ventricular hypertrophy/natural                 |
| ND248       | 57        | 21.7   | 460            | Control/suicide                                      |
| ND249       | 31        | 22     | 343            | Control/suicide                                      |
| ND251       | 39        | 33.7   | 582            | Control/Intoxication                                 |
| ND252       | 37        | 20     | 496            | left ventricular hypertrophy/natural                 |
| ND259       | 60        | 23.7   | 400            | Control/intoxication                                 |
| ND279       | 61        | 29     | 710            | left ventricular hypertrophy/natural                 |
| ND288       | 63        | 30     | 563            | left ventricular hypertrophy/intoxication            |

6 Samples in Table S2 were used to generate data in Figure 5C-F.

7 **Table S3: Antibody order information and concentrations**

8 IF = immunofluorescence, IB = immunoblotting

| Antibody  | Order Information                       | Technique | Dilution Used |
|-----------|-----------------------------------------|-----------|---------------|
| ANF       | Bachem T-4014                           | IF        | 1:500         |
| pERK      | Cell signalling technology (CST), 9106S | IB        | 1:1000        |
| T-ERK     | BD Biosciences, 610031                  | IB        | 1:5000        |
| α-Actinin | Sigma Adrich, A7811                     | IB        | 1:2000        |
|           |                                         | IF        | 1:100         |

|                             |                                                                  |      |          |
|-----------------------------|------------------------------------------------------------------|------|----------|
| B-Actin                     | Abcam, 52219                                                     | IF   | 1:1000   |
| Histone3                    | Sigma Aldrich, H0164                                             | IB   | 1:10 000 |
| Phos H3S10                  | CST, 9701S                                                       | IB   | 1:1000   |
| Phos H3S28                  | Sigma Aldrich, H9908                                             | IB   | 1:2000   |
|                             |                                                                  | IF   | 1:1000   |
| Phos H3S28                  | Millipore, 07-145                                                | ChIP | 1:100    |
| PCM1                        | Sigma Aldrich<br>Prestige, HPA023370                             | IF   | 1:500    |
| Nesprin1                    | MANNES1A (7A12)<br>kindly donated to use<br>by Glenn Morris) (1) | IF   | 1:100    |
| pMSK                        | CST, 9591S                                                       | IB   | 1:1000   |
| cFos                        | Abcam, ab190289                                                  | IF   | 1:250    |
| FLAG                        | Sigma Aldrich,<br>FF3165                                         | IB   | 1:2000   |
|                             |                                                                  | IF   | 1:100    |
| <b>Secondary Antibodies</b> |                                                                  |      |          |
| HRP-conjugated antibodies   | Jackson Laboratories                                             | IB   | 1:10 000 |
| Alexa 488                   | Life Technologies,<br>R37116, A-11029                            | IF   | 1:500    |
| Alexa 568                   | Life Technologies, A-<br>11036                                   | IF   | 1:500    |
| Alexa 647                   | Life Technologies, A-<br>21244                                   | IF   | 1:500    |

9

10 **Table S4: Primer sequence information**

11 Primers were ordered from Sigma Aldrich or Integrated DNA Technologies as

12 lyophilized custom oligos, purified by desalting.

| Gene target   | Species | Sequence                                            |
|---------------|---------|-----------------------------------------------------|
| <b>RTqPCR</b> |         |                                                     |
| GAPDH         | Rat     | F-CAAGATGGTGAAGGTCGGTGT<br>R-GGTCGTTGATGGCAACAATG   |
|               | Mouse   | F-AATGGTGAAGGTCGGTGTGAAC<br>R-TCGTTGATGGCAACAATCTCC |
|               | Human   | F-GAGTCAACGGATTTGGTCGT<br>R-GACAAGCTTCCCGTTCTCAG    |
| TBP           | Rat     | F-TGACTCCTGGAATTCATC<br>R-TGTGTGGGTTGCTGAGATGT      |
|               | Mouse   | F-GGGGAGCTGTGATGTGAAGT<br>R-CAGGAGAACATGGCAGACAA    |
|               | Human   | F-TATAATCCCAAGCGTTTGC<br>R-GCTGGAAAACCCAATTCTG      |
| YWHAZ         | Rat     | F-ACCCACTCCGGACACAGAAT                              |



|        |           |                                                                                        |
|--------|-----------|----------------------------------------------------------------------------------------|
|        |           | R- AGGCTGCCATGTCATCGTA                                                                 |
|        | Mouse     | F-CAGAAGACGGAAGGTGCTGAGA<br>R-CTTTCTGGTTGCGAAGCATTGGG                                  |
|        | Human     | F-CGAGATCCAGGGACAGAGTC<br>R-GGATGTTCTGTGTCCGGAGT                                       |
| 18S    | Rat/Mouse | F-ATCCATTGGAGGGCAAGTC<br>R-CGCTCCCAAGATCCAACACTAC                                      |
|        | Human     | F-AAACCACAGGCAAACACCTC<br>R-GCACTTTGGGTGGTCAAGTT                                       |
| RPL32  | Rat/Mouse | F-GGCCAGATCCTGATGCCCAAC<br>R-CAGCTGTGCTGCTCTTTCTAC                                     |
|        | Human     | F-AGGCATTGACAACAGGGTTC<br>R-GACGTTGTGGACCAGGAAC                                        |
| SDHA   | Rat       | F-TCGCACTGTGCATAGAGGAC<br>R-ATGCCTGTAGGGTGGAACCTG                                      |
|        | Mouse     | F-AAGGCAAATGCTGGAGAAGA<br>R-TGGTTCTGCATCGACTTCTG                                       |
|        | Human     | F-TCGCACTGTGCATAGAGGAC<br>R-GCCTGTAGGGTGGAACCTGAA                                      |
| LMNA   | Rat       | F-TGAGTACAACCTGCGCTCAC<br>R-TGTGACACTGGAGGCAGAAG                                       |
|        | Mouse     | F-GCACCGCTCTCATCAACTCC<br>R-TCTTCTCCATCCTCGTCGTCA                                      |
|        | Human     | F-CTACACCAGCCAACCCAGAT<br>R-GGTCTGAAGGACAGAGACTGC                                      |
| Tuba 6 | Mouse     | F-GGCAGTGTTTCGTAGACCTGGA<br>R-TTATTGGCAGCATCCTCCTTG                                    |
| cFOS   | Rat       | F-CCGACTCCTTCTCCAGCATG<br>R-GTGGAGATGGCTGTCACCGT                                       |
|        | Mouse     | F-GGGAATGGTGAAGACCGTGTCA<br>R-GCAGCCATCTTATTCCGTTCCC                                   |
|        | Human     | F-GCCTCTCTTACTACCACTCACC<br>R-AGATGGCAGTGACCGTGGGAAT                                   |
| cJUN   | Rat       | F-TTGAAAGCGCAAAACTCCGA<br>R-GTTAGCATGAGTTGGCACCC                                       |
|        | Mouse     | F-CAGTCCAGCAATGGGCACATCA<br>R-GGAAGCGTGTTCTGGCTATGCA                                   |
|        | Human     | F-CCTTGAAAGCTCAGAACTCGGAG<br>R-TGCTGCGTTAGCATGAGTTGGC                                  |
| JUND   | Rat       | F-g a c a t g g a c a c g c a g g a a c<br>R-t c t g g c t t t t g a g g g t c t t g   |
|        | Human     | F-ATCGACATGGACACGCAGGAGC<br>R-CTCCGTGTTCTGACTCTTGAGG                                   |
| FOSB   | Rat       | F-a a a c a a a c a a a c c g c a a g g<br>R-g g c g g t c a g a c a g a a g a g t c   |
|        | Human     | F-TCTGTCTTCGGTGGACTCCTTC<br>R-GTTGCACAAGCCACTGGAGGTC                                   |
| FOSL   | Rat       | F-a g a g c t g c a g a a g c a g a a g g<br>R-g c t g g t a c c a c c t g t g t c c t |

|              |       |                                                                                          |
|--------------|-------|------------------------------------------------------------------------------------------|
|              | Human | F-GGAGGAAGGAACTGACCGACTT<br>R-CTCTAGGCGCTCCTTCTGCTTC                                     |
| SMARCA4/BRG1 | Rat   | F-CTACAGGAGCGGGAGTACAG<br>R-TGGTTGCTTTGGTTCGAAGG                                         |
|              | Mouse | F-GAAAGTGGCTCTGAAGAGGAGG<br>R-TCCACCTCAGAGACATCATCGC                                     |
|              | Human | F-CAAAGACAAGCACATCCTCGCC<br>R-GCCACATAGTGCGTGTTGAGCA                                     |
| MSK1         | Rat   | F-TCTATGTTGGAGAGATCGTGCTTG<br>R-AATCTGTCAGCACCATGGC                                      |
|              | Mouse | F-TGGTCCATAGCACCTCTCAGCT<br>R-CTCTCCGCCATTGAGAAGTTCC                                     |
|              | Human | F-CCTGGAACACATTAGGCAGTCG<br>R-CACCTCATGCTCTGTGAAACGC                                     |
| MSK2         | Rat   | F-ATCCTGGACTATGTGAGCGG<br>R-CTAGGGCCAGCACAAATCTCT                                        |
|              | Mouse | F-CAACGTGGTGAATCTGCATGAGG<br>R-AGCCGCTTCTTGCGGATGTGTT                                    |
|              | Human | F-TGTGGGCAACTTTGCGGAGGAA<br>R-GAGAATGGAGGGTGCCACAAAG                                     |
| MYH6         | Rat   | F-ACAGAGTGCTTCGTGCCTGAT<br>R-CGAATTTGCGAGGGTTCTGC                                        |
|              | Mouse | F-CAGAGGAGAAGGCTGGTGTC<br>R-CTGCCCTTGGTGACATACT                                          |
|              | Human | F-CTGGGCAAGTCCAACAATTT<br>R-CCAGCCCAGGATGTTGTAGT                                         |
| MYH7         | Rat   | F-GCCTACAAGCGCCAGGCT<br>R-CATCCTTAGGGTTGGGTAGCA                                          |
|              | Mouse | F-CTTCAACCACACATGTTTCG<br>R-TCTCGATGAGGTCAATGCAG                                         |
|              | Human | F-GTGAAAGTGGGCAATGAGT<br>R-TGGTGAAGTTGATGCAGAGC                                          |
| Nppa/Anf     | Rat   | F-CGTATACAGTGCGGTGTCCAAC<br>R-CCTCATCTTCTACCGGCATC                                       |
|              | Mouse | F-GTGCGGTGTCCAACACAGAT<br>R-TTCCTCAGTCTGCTCACTCAGG                                       |
| Nppb/Bnp     | Rat   | F-GGTCTCAAGACAGCGCCTTCC<br>R-CTTCCTAAAACAACCTCAGCCCGTC                                   |
|              | Mouse | F-GCCAGTCTCCAGAGCAATTC<br>R-GTTCTTTTGTGAGGCCTTGG                                         |
| COL1A1       | Mouse | F-GCCAAGAAGACATCCCTGAA<br>R-GCCATTGTGGCAGATACAGA                                         |
| Casp3        | Mouse | F- GGGCCTGTTGAACTGAAAAA<br>R- CCGTCCTTTGAATTTCTCCA                                       |
| Casp9        | Mouse | F- GCCAGAGGTTCTCAGACCAG<br>R- AAGCCGTGACCATTTTCTTG                                       |
| Bax          | Mouse | F- t g c a g a g g a t g a t t g c t g a c<br>R- g a t c a g c t c g g g c a c t t t a g |
| Bcl-2        | Mouse | F- g g a c t t g a a g t g c c a t t g g t                                               |

|                  |       |                                                     |
|------------------|-------|-----------------------------------------------------|
|                  |       | R- a g c c c c t c t g t g a c a g c t t a          |
| <b>ChIP-qPCR</b> |       |                                                     |
| cFos promoter    | Rat   | F-CCTTGCGCTGCACCCTCAGA<br>R-CGGCCGTGGAAACCTGCTGA    |
| cJun promoter    | Rat   | F-TGTAGGAGCGCAGCGGAGCA<br>R-CCCACCCGTCGCCATGGAGA    |
| cFOS promoter    | Human | F-TGTTATAAAAGCAGTGGCTGCG<br>R-TCTTGGCTTCTCAGATGCTCG |
| cJUN promoter    | Human | F-TCTCTCCGTCGCAACTTGTC<br>R-ACGCAGCAGTTGCAAACATT    |
| SMARCA4 promoter | Human | F-GGGAAGTTTTGCAGAGAAGGC<br>R-CCTGGGAACCGCTTTGATCC   |
