1 Title: **MSK-mediated phosphorylation of Histone 3 Ser28 couples MAPK**  
2 **signaling with early gene induction and cardiac hypertrophy**

3 Running title: **MSK-mediates cardiac hypertrophy**

4

5 Emma L. Robinson<sup>1,2\*†</sup>, Faye M Drawnel<sup>3,4\*</sup>, Saher Mehdi<sup>1\*</sup>, Caroline R. Archer<sup>3</sup>, Wei  
6 Liu<sup>5</sup>, Hanneke Okkenhaug<sup>3</sup>, Kanar Alkass<sup>6</sup>, Jan Magnus Aronsen<sup>7,8</sup>, Chandan K  
7 Nagaraju<sup>1</sup>, Ivar Sjaastad<sup>7,9</sup>, Karin R Sipido<sup>1</sup>, Olaf Bergmann<sup>10</sup>, J. Simon C. Arthur<sup>11</sup>,  
8 Xin Wang<sup>5</sup>, and H. Llewelyn Roderick<sup>1,9†</sup>

9 <sup>1</sup> KU Leuven, Department of Cardiovascular Sciences, Laboratory of Experimental  
10 Cardiology, B-3000, Leuven, Belgium.

11 <sup>2</sup> Department of Cardiology, Cardiovascular Research Institute Maastricht, Maastricht  
12 University, The Netherlands

13 <sup>3</sup> Epigenetics and Signalling Programmes, Babraham Institute, Cambridge, United  
14 Kingdom

15 <sup>4</sup> Roche Pharma Research and Early Development, Roche Innovation Center Basel,  
16 F. Hoffmann-La Roche Ltd, Basel, Switzerland

17 <sup>5</sup> Faculty of Biology, Medicine and Health, University of Manchester, United Kingdom

18 <sup>6</sup> Karolinska Institutet, BioClinicum, Oncology and Pathology, SE-17177 Stockholm,  
19 Sweden; The National Board of Forensic Medicine, Stockholm, Sweden

20 <sup>7</sup> Institute for Experimental Medical Research, Oslo University Hospital and University  
21 of Oslo, Oslo, Norway

22 <sup>8</sup> Bjørknes College, Oslo, Norway

23 <sup>9</sup> KG Jebsen Center for Cardiac Research, University of Oslo, Norway

24 <sup>10</sup> Karolinska Institutet, Biomedicum, Cell and Molecular Biology, SE-17177

25 Stockholm, Sweden

26 <sup>11</sup> Division of Immunology and Cell Signalling, School of Life Sciences, University of

27 Dundee, Dundee, United Kingdom

28

29

30

31

32

33

34

35

36

37 \*These authors contributed equally

38 †For correspondence: *E-mail:* [llewelyn.roderick@kuleuven.be](mailto:llewelyn.roderick@kuleuven.be);

39 [e.robinson@maastrichtuniversity.nl](mailto:e.robinson@maastrichtuniversity.nl)

40 Some of this work was carried out while ELR and HLR were at the Babraham Institute.

41 Current affiliations: CA is at Safety and ADME Translational Sciences, Drug Safety and  
42 Metabolism, IMED Biotech Unit, AstraZeneca, Cambridge, United Kingdom. SM is at  
43 Wellwise, Research and Development, IIIT Innovation and Incubation, IIIT Delhi, New  
44 Delhi, India. HO is at the Imaging Facility, Babraham Institute, Cambridge, United  
45 Kingdom

46 **Key words:** cardiomyocyte; MSK; phosphorylated Histone 3 Serine 28; immediate  
47 early genes; hypertrophy

48 **Brief summary one sentence:** MSK1/2 phosphorylation of Histone 3 Serine 28  
49 couples MAPK signalling with chromatin remodelling and immediate early gene  
50 expression to induce pro-hypertrophic cardiac transcriptional responses.

51

52 **Abbreviations:**

53 Ascending aortic banding, AB; atrial natriuretic factor, ANF/Nppa; brain natriuretic  
54 factor; BNP/Nppb; cardiovascular disease, CVD; chromatin immunoprecipitation,  
55 ChIP; cytosine b-D-arabinofuranoside; ara-C; Ca<sup>2+</sup>/calmodulin-dependent protein  
56 kinase, CaMKII; endothelin-1, ET-1; extracellular signal-regulated kinase 1/2, ERK1/2;  
57 fractional shortening, FS; G-protein coupled receptor, GPCR; heart failure, HF; Histone  
58 3, H3; Histone H3 Serine 10, H3S10; phosphorylated H3S10, p-H3S10; Histone H3  
59 Serine 28, H3S28; phosphorylated H3S28, pH3S28, hours, h; immediate early gene,  
60 IEG; knockout, KO; mitogen activated protein kinase, MAPK; mitogen and stress  
61 activated kinase, MSK; isoproterenol, Iso; minutes, min; myosin heavy chain,  $\alpha$   
62 isoform,  $\alpha$ -MHC; myosin heavy chain,  $\beta$  isoform,  $\beta$ -MHC; neonatal rat ventricular  
63 myocytes, NRVMs; nuclear factor of activated T cells, NFAT; PD184352 (inhibitor of  
64 the upstream kinase of ERK1/2, MEK1/2), PD; posterior wall thickness in diastole,  
65 PWd; serum response factor, SRF; transverse aortic constriction, TAC; small  
66 interfering RNA, siRNA; wild type, WT.

67 **Abstract**

68 Heart failure is a leading cause of death that develops subsequent to deleterious  
69 hypertrophic cardiac remodelling. MAPK pathways play a key role in coordinating the

70 induction of gene expression during hypertrophy. Induction of the immediate early  
71 gene (IEG) response is a necessary and early event in this process. How MAPK and  
72 IEG expression are coupled during cardiac hypertrophy is not yet resolved. Here, in  
73 vitro, in rodent models and in human samples, we demonstrate that MAPK-stimulated  
74 IEG induction depends on the Mitogen and Stress activated protein Kinase (MSK) and  
75 its phosphorylation of histone H3 at serine 28 (pH3S28). pH3S28 in IEG promoters in  
76 turn recruits Brg1, a BAF60 ATP-dependent chromatin remodelling complex  
77 component, initiating gene expression. Without MSK activity and IEG induction, the  
78 hypertrophic response is suppressed. These studies provide new mechanistic insights  
79 and highlight the role of signalling to the epigenome in gene expression regulation  
80 during cardiac hypertrophy.

81

82

83

84

85

86

87

88

## 89 **Introduction**

90 Cardiovascular diseases (CVDs) are the leading cause of mortality and morbidity  
91 worldwide (Savarese and Lund, 2017). While cardiac hypertrophy is initially an

92 adaptive response to increased workload or stress that enables cardiac function to  
93 meet the changing needs of the organism, when induced by pathological cues such as  
94 aortic stenosis, prolonged hypertension or myocardial infarction, over time, the  
95 response can decompensate resulting in a decline in cardiac function and progression  
96 to heart failure. At the cellular level, owing to their terminally differentiated status,  
97 hypertrophy of the cardiac muscle is mediated by growth of existing cardiomyocytes  
98 and not through their proliferation (Alkass et al., 2015).

99 Signalling pathways activated downstream of G protein coupled receptors (GPCR),  
100 such as those liganded by endothelin-1 (ET-1) and angiotensin II play a fundamental  
101 role in the induction of pathological hypertrophic remodelling (Drawnel et al., 2013;  
102 Wang et al., 2018). Owing to their nodal position in pathways downstream of GPCR  
103 activation, Mitogen Activated Protein Kinases (MAPK) are of particular importance in  
104 induction of hypertrophic growth of cardiomyocytes. Indeed, these signalling mediators  
105 affect pathological hypertrophic growth via regulation of protein synthesis, cell survival,  
106 metabolism and gene transcription. (Bueno et al., 2000; Rose et al., 2010).

107 MAPKs fall into four major families which are categorised according to the terminal  
108 kinase in the pathway – the extracellular regulated kinases 1 and 2 (ERK1/2), p38  
109 MAPK, c-Jun N-terminal kinases 1 and two (JNK1/2) and ERK5 (Bueno et al., 2000;  
110 Rose et al., 2010). Involvement of all limbs of this family of kinases has been  
111 demonstrated in regulating hypertrophic remodelling, the phenotypic outcome differs  
112 depending upon the relative activation of each family member (Garrington and  
113 Johnson, 1999; Heineke and Molkenin, 2006; Rose et al., 2010). For example,  
114 enhanced ERK signalling leads to concentric cardiac hypertrophy with preserved  
115 cardiac function, whereas the alpha isoform of p38 has a pro-apoptotic function, which

116 when prevented, results in protection against CM-associated cardiac injury (Bueno et  
117 al., 2000; Kaiser et al., 2004; Marber et al., 2011; Yokota and Wang, 2016).

118 During cardiac hypertrophy, MAPK pathways intervene in transcriptional regulation via  
119 phosphorylation-dependent modulation of transcription factors including NFAT, Elk,  
120 SRF and GATA4 (Sanna et al., 2005). Preceding expression of hypertrophic genes,  
121 ERK-dependent activation of an immediate early gene (IEG) response is observed in  
122 cardiomyocytes. Specifically, IEG expression is rapidly activated in cultured rat  
123 neonatal ventricular cardiomyocytes in response to stimulation with hypertrophic  
124 agonists, and in vivo following pressure overload (Archer et al., 2017; Iwaki et al., 1990;  
125 Izumo et al., 1988). This response is initiated through phosphorylation-dependent  
126 activation of the AP-1 family of transcription factors, which promote the induction of  
127 IEG expression within minutes of the initiating cue (Balmanno and Cook, 1999; Gille et  
128 al., 1992; Karin et al., 1997). Proto-typical IEG include members of the FOS (c-FOS,  
129 FOSB, FRA-1 and FRA-2), Jun (JUNB, JUND and c-JUN) and activating transcription  
130 factor (ATF; ATFa, ATF2, LRF1/ATF3, ATF4 and B-ATF) families of basic-leucine  
131 zipper transcription factors (Eferl and Wagner, 2003). Heterodimers of Fos and Jun  
132 associate with ATFs to form the AP-1 transcription factor complex (Glover and  
133 Harrison, 1995). The actions of AP-1 transcription factors are also mediated via direct  
134 interactions with other transcription factors, many of which, including NFkB and NFAT  
135 are involved in collaborations in regulating gene expression in many non-cardiac  
136 systems (Chen et al., 1998; Torgerson et al., 1998; Yang et al., 2010). The AP-1  
137 complex is also involved in cardiac hypertrophic responses. This role is clearly  
138 illustrated in in vitro and in vivo experiments in which AP-1 activity is suppressed  
139 through expression of dominant negative JUN (DN-JUN; also known as TAM67) or of  
140 the endogenous AP-1 inhibitor JUND (Hilfiker-Kleiner et al., 2006; Kim-Mitsuyama et

141 al., 2006; Takeuchi et al.). Moreover, muscle-specific knockout of c-Jun results in a  
142 loss of the initial compensatory phase of the pathological hypertrophic response and a  
143 progression to cardiac dilation, indicating a requirement for c-Jun in the initial phase of  
144 the cardiac hypertrophic response (Tachibana et al., 2006; Windak et al., 2013). Taken  
145 together, these results indicate that despite certain specific roles for different IEG, the  
146 AP-1 transcription factor complex fulfils important and complex functions in  
147 hypertrophic remodelling.

148 Although ERK activation and IEG induction in cardiomyocytes are highly correlated,  
149 the mechanism by which these events are coupled during induction of cardiomyocyte  
150 hypertrophy is not resolved. In other systems, MAPK activation leads to a nucleosomal  
151 response at IEG loci that involves phosphorylation and acetylation of serine and lysine  
152 residues respectively in the histone H3 NH<sub>2</sub>-terminal tail (Clayton et al., 2000; Dyson  
153 et al., 2005). Phosphorylated histone H3 in turn recruits scaffolding proteins such as  
154 14-3-3 family members, downstream transcriptional regulators and chromatin  
155 remodelling factors to bring about gene expression changes. The absence of a  
156 consensus site for ERK1/2 phosphorylation in the NH<sub>2</sub>-terminus of histone H3 would  
157 suggest that its phosphorylation is not directly via ERK1/2 but a downstream kinase. A  
158 candidate for this activity is the family of nuclear-localised mitogen and stress activated  
159 kinases (MSK1/2), which have been reported to mediate histone H3 phosphorylation  
160 (Duncan et al., 2006; Soloaga et al., 2003). MSKs are nuclear-localised kinases  
161 comprising N- and C-terminal kinase domains separated by a flexible linker peptide.  
162 After an initial phosphorylation event by upstream MAPK including ERK1/2, MSKs  
163 undergo autophosphorylation, leading to full activation (Malakhova et al., 2009; McCoy  
164 et al., 2005). MSK1 and the highly homologous kinase MSK2 are both expressed in  
165 the heart and are activated in response to hypertrophic stimuli suggesting a potential

166 role in hypertrophic remodelling (Deak et al., 1998a; Markou et al., 2004, 2009). A  
167 functional role of MSK in the heart and remains to be demonstrated however with  
168 studies thus far being compromised by the highly non selective inhibitors of MSK  
169 employed (Markou et al., 2009; Naqvi et al., 2012). Indeed, inhibitors used show equal  
170 efficacy on other kinases important in cardiomyocyte stress responses including  
171 RSK2, PKC isoforms and S6 kinase (Markou et al., 2009; Naqvi et al., 2012).  
172 Delineating whether MSK plays a role in cardiomyocyte responses and whether it  
173 contributes to the induction of the IEG response in these cells via a nucleosomal  
174 response remains key to understanding how cardiomyocytes respond to hypertrophic  
175 stimuli.

176 Here, we determined that MSK1/2 activated downstream of ERK1/2 was required for  
177 the cardiomyocyte hypertrophic response both in vitro and in vivo. MSKs elicits this  
178 function through promoting the phosphorylation of histone H3 S28 (pH3S28), which in  
179 turn recruits AP-1 factors, c-FOS and c-JUN along with the chromatin remodeller BRG-  
180 1 to IEG promoters, inducing transcription. Notably, the activation and role of the  
181 ERK1/2-MSK1/2-pH3S28 molecular axis was conserved in human samples  
182 demonstrating the relevance to human disease.

183 Together our data identify a key and missing component in the signalling pathway that  
184 transduces the activation of GPCRs by pathological pro-hypertrophic mediators in  
185 cardiomyocytes to the induction of hypertrophic remodelling.

186

187

188

189 **Results**



190 **ERK1/2 activity is required for the induction of cardiomyocyte hypertrophic gene**  
191 **expression by ET-1 in vitro.**

192 MAPK signalling pathways, IEG induction and AP-1 transcription factor engagement  
193 contribute to the hypertrophic remodelling of cardiomyocytes (Archer et al., 2017). To  
194 examine the mechanisms underlying induction of IEG expression, the signalling  
195 pathways involved and their relationship to cellular hypertrophic responses were  
196 analysed in in vitro and in vivo models following acute exposure to established inducers  
197 of pathological hypertrophy.

198 Consistent with findings from our laboratory and elsewhere, application of the GPCR  
199 agonist endothelin-1 (ET-1) for 24 h stimulated a classical hypertrophic response in  
200 neonatal rat ventricular myocytes (NRVMs) that was associated with increases in  
201 mRNA levels of *Anf/Nppa* and *Bnp/Nppb*, in cell size and in the number of cells positive  
202 for perinuclear Anf protein (Figure 1A-C and S1A). Alongside this hypertrophic  
203 response, the expression of IEGs including *c-Fos* and *c-Jun*, was rapidly upregulated  
204 in ET-1 stimulated NRVMs (Archer et al., 2017) (Figure 1D, Figure S1B). These effects  
205 of ET-1 on both induction of hypertrophy and IEGs were prevented by inhibition of the  
206 MAPK pathway with PD184352 (PD, an inhibitor of the direct upstream kinase of  
207 ERK1/2, MEK1/2; Figure S1C) (Archer et al., 2017; Heineke and Molkentin, 2006)  
208 (Figure 1A-D). The efficacy of PD in preventing ERK1/2 activation (and hence MAPK  
209 pathway activation) was confirmed by immunoblotting, which showed a loss of the  
210 phosphorylated active form of ERK, pERK1/2, which was elevated in ET-1 stimulated  
211 NRVMs (Figure S1D). Baseline pERK1/2 in non-stimulated cells was also decreased  
212 following PD (Figure S1D).

213 Consistent with the role of MAPK signalling to AP-1 in hypertrophy induction, a MAPK-  
214 dependent increase in activity of a luciferase-based AP-1 reporter was observed in ET-

215 1 stimulated NRVMs (Figure 1E). Further, inhibition of AP-1 activity by adenoviral-  
216 mediated expression of dominant negative Jun (DN-Jun) abrogated the ET-1  
217 stimulated increases in cell surface area and *Nppa* mRNA (Figure 1F-G).

218 Together, these data confirm that a pathway involving ERK1/2, IEG induction and AP-  
219 1 activity is engaged and required for the immediate early hypertrophic response to  
220 ET-1.

221

222 **Endothelin-1 stimulates ERK-dependent phosphorylation of Histone H3 Serine**  
223 **28.**

224 The nucleosomal response – a term coined to link histone phosphorylation and IEG  
225 induction - is reported to be indissociable from ERK1/2 activity in a number of cell  
226 contexts. We therefore determined whether this nucleosomal response was engaged  
227 during ET-1 stimulated IEG induction in NRVM. Levels of histone H3 phosphorylated  
228 at Ser 10 and Ser 28 (pH3S10 and pH3S28) were quantified in histones acid-extracted  
229 from NRVMs exposed to ET-1. Consistent with the time-course of *c-Fos* induction, ET-  
230 1 promoted a significant increase in H3S28 phosphorylation at 10 min, which was not  
231 increased further at 30 min post ET-1 application (Figure 2A). Notably, the ET-1-  
232 stimulated increase in H3S28 phosphorylation was ERK pathway dependent, as  
233 shown by the loss of the response to ET-1 in cells treated with PD (Figure 2A). Neither  
234 ET-1 nor PD significantly affected H3S10 phosphorylation (Figure 2A).

235 The stimulation of H3S28 phosphorylation by hypertrophic agonists was next  
236 measured in vivo. To this end, cardiomyocyte H3S28 phosphorylation was analysed in  
237 adult rats subsequent to 15 min infusion with sub-pressor levels of ET-1 via the jugular  
238 vein (Archer et al., 2017; Beyer et al., 1994; Dyson et al., 2005). Responses to the

239 synthetic  $\beta$ -adrenergic agonist isoproterenol (Iso), which is often used chronically to  
240 induce pathological cardiac remodelling was also determined (Boluyt et al., 1995; Liu  
241 et al., 2009). Both ET-1 and Iso induced a significant increase in pH3S28 in  
242 cardiomyocyte nuclei (demarcated by Pcm-1 staining) in heart sections from rats  
243 infused with ET-1 and Iso (Figure 2B). Concurrent with increased pH3S28 in this in  
244 vivo model, mRNA expression of IEGs was induced following 15 min stimulation  
245 (Figure 2C and S2A). Supporting the pro-hypertrophic effect of these infusions with  
246 ET-1 or Iso, expression of the classic hypertrophy-associated foetal gene programme,  
247 including *Nppa/Anf* and *Nppb/Bnp* was also induced in these animals (Figure S2B).

248 To probe whether IEG promoters were phosphorylated at histone H3 during this  
249 intervention, chromatin immunoprecipitation (ChIP) experiments were performed.  
250 Chromatin was precipitated using antibodies against phosphorylated H3S28 and  
251 product detected by qPCR using primer pairs targeting the *c-Jun* and *c-Fos* promoters,  
252 as shown in the cartoons (Figure 2D). Notably, consistent with the increase in  
253 phosphorylated H3S28 detected by immunoblotting and immunofluorescence staining  
254 of bulk histones, ChIP enrichment for pH3S28-associated IEG promoters was  
255 substantially increased following 15 min ET-1 or Iso infusion (Figure 2D).

256

### 257 **MSK1/2 is activated following ET-1 stimulation in an ERK1/2 dependent manner** 258 **and is required for IEG expression**

259 Although ERK activation is required for ET-1 dependent phosphorylation of histone H3  
260 at S28, the absence of consensus sequences for its phosphorylation of H3 would  
261 suggest that it is not the responsible histone-kinase. Rather, ERK activates a  
262 downstream effector kinase that in turn phosphorylates histone H3. A candidate for  
263 this action is the mitogen and stress-activated kinase (MSK1/2), which has been shown

264 in other tissue contexts to phosphorylate H3S28 (Soloaga et al., 2003). While MSK1/2  
265 activation following hypertrophic stimulation is reported in cardiomyocytes, it has not  
266 been shown to play a role in histone phosphorylation and IEG induction. To establish  
267 whether MSK1/2 was engaged during ET-1 stimulation of cardiomyocytes and whether  
268 ERK activity was involved, levels of MSK1 phosphorylated at S376, a phosphorylation  
269 event required for activity, were analysed by immunoblotting of lysates prepared from  
270 NRVM stimulated with ET-1-stimulated  $\pm$  PD (Figure 3A). As shown in the immunoblot  
271 and accompanying densitometric analysis, ET-1 stimulated an increase in pMSK that  
272 was sensitive to MEK/ERK pathway inhibition with PD (Figure 3A). Importantly, using  
273 the in vivo model described earlier, an increase in pMSK was also detected in  
274 cardiomyocyte nuclei in heart sections from rats infused with ET-1 or Iso for 15 min  
275 (Figure 3B). Together, these experiments indicated that hypertrophic agonists  
276 stimulate a rapid phosphorylation of MSK in cardiomyocytes that is dependent on  
277 activation of MEK/ERK signalling.

278 Experiments were next conducted to investigate the functional role of MSK in the  
279 nucleosomal response to ET-1 in cardiomyocytes. Owing to the lack of availability of  
280 specific and sensitive pharmacological agents targeting MSK1/2 (Bain et al., 2007), a  
281 molecular approach was adopted to manipulate its activity. To this end, adenoviruses  
282 were first employed. MSK1 signalling was enhanced through overexpression of wild-  
283 type MSK1 (WT-MSK), whilst endogenous MSK1 was inhibited by expression of a  
284 D565A kinase dead mutant of MSK1 that acts in a dominant-negative fashion (DN-  
285 MSK1) (Deak et al., 1998a). Owing to shared regulatory mechanisms of MSK1 and  
286 MSK2, DN-MSK1 would be expected to inhibit activity of both kinases, overcoming  
287 possible redundancy (Zhong et al., 2001). Immunofluorescence analysis demonstrated  
288 that adenovirally-expressed FLAG-tagged WT- and DN-MSK1 were both localised to

289 the nucleus in NRVMs (Figure 3C). Overexpression of the WT and DN-MSK1 proteins  
290 at equivalent levels was confirmed by immunoblotting using an antibody directed  
291 against their NH<sub>2</sub>-terminal FLAG epitope (Figure 3D). Overexpression of WT-MSK1  
292 produced an increase in baseline MSK1 phosphorylation whilst DN-MSK1 prevented  
293 the activation of endogenous MSK1 in response to ET-1, consistent with a dominant  
294 negative effect (Figure 3D). Neither overexpression of WT-MSK1 or DN-MSK1 affected  
295 ERK1/2 activation by ET-1, indicating that effects of these strategies to modify MSK  
296 activity are not mediated via altered ERK1/2 activity but by MSK1 itself (Figure 3D).  
297 The consequences of WT and DN-MSK1 expression on ET-1 stimulated histone  
298 H3S28 phosphorylation were next measured. Notably, both ET-1 and overexpression  
299 of WT-MSK1 elevated levels of pH3S28 in NRVMs, whereas expression of DN-MSK1  
300 prevented the ET-1 stimulated increase in pH3S28 (Figure 3E), thereby demonstrating  
301 the requirement for MSK activity for H3S28 phosphorylation during the hypertrophic  
302 response to ET-1.

303 Whether the effect of WT and DN-MSK on MSK activation in ET-1 stimulated NRVM  
304 translated to an effect on IEG induction and hypertrophic responses was next  
305 examined (Figure 3F-G). NRVM expressing WT-MSK expression exhibited a  
306 significant elevation in *c-Fos* expression compared to control, which was not increased  
307 further by 10 min exposure to ET-1 (Figure 3F). Consistent with its effects on kinase  
308 activation and H3S28 phosphorylation, DN-MSK1 expression significantly inhibited ET-  
309 1 stimulated *c-Fos* induction. WT-MSK expression also had a significant effect on cell  
310 hypertrophy, stimulating an increase in cell area in the absence of ET-1 (Figure 3G).  
311 WT-MSK1 did not promote a significant increase in *Nppa* mRNA. Notably DN-MSK1  
312 expression suppressed hypertrophic responses in NRVM exposed to ET-1 for 24 h,  
313 with a significant inhibition of the ET-1 stimulated increases in *Nppa* mRNA and in cell

314 size observed when compared to controls (Figure 3G). Further supporting the role of  
315 MSK in histone H3 S28 phosphorylation, IEG induction and hypertrophy, abrogation of  
316 ET-1 stimulated increases in H3S28 phosphorylation, *c-Fos* and *Nppa* mRNA  
317 expression were also observed in ARVM (Figure S3A-C).

318 Having validated that suppression of MSK activity via DN-MSK1 expression could  
319 prevent ET-1 stimulated phosphorylation of histone H3S28, *c-Fos* induction and  
320 hypertrophic responses, we next probed the requirement for MSK for ET-1 stimulated  
321 phosphorylation of H3S28 at IEG promoters. To this end, ChIP experiments were  
322 carried out in NRVMs expressing DN-MSK1 or empty vector control that were exposed  
323 to ET-1 or vehicle for 10 min. Importantly, DN-MSK1 prevented the ET-1-stimulated  
324 increase in pH3S28 specifically at IEG promoters (Figure 3H). In these experiments,  
325 the ET-1 stimulated ChIP enrichment of *c-Jun* and *c-Fos* promoters was lost in NRVM  
326 overexpressing DN-MSK1 (Figure 3H).

327 To complement the experiments using DN-MSK, the requirement of MSK activity for  
328 ET-1 induction of *c-Fos*, *Msk1* mRNA expression was tested by knocking down its  
329 expression using small interfering RNA (siRNA). Using this approach, ~60 % reduction  
330 in *Msk1* mRNA was achieved compared to NRVM transfected with scrambled control  
331 siRNA (Figure S3C). In *Msk1* siRNA knockdown (siMsk1) NRVMs, ET-1 stimulated  
332 induction of *c-Fos* was significantly blunted after 10 min exposure (Figure S3D).  
333 Moreover, siMsk1 prevented ET-1 stimulated induction of hypertrophic gene  
334 expression (Figure S3E).

335 Together, these data generated using siRNAs and adenoviruses to manipulate both  
336 MSK activity and expression not only indicate that H3S28 is a substrate for MSK1 but  
337 also that MSK1 is the kinase responsible for the phosphorylation of H3S28 and  
338 induction of *c-Fos* expression in cardiomyocytes stimulated with ET-1. Moreover, our

339 data shows that these events are required for the hypertrophic response of  
340 cardiomyocytes.

341

342 **MSK1-mediated phosphorylation of H3S28 recruits BRG1, a component of the**  
343 **SWI/SNF family of chromatin remodellers to IEG loci**

344 Previous studies have reported a requirement for the BRG1 (encoded by gene  
345 *SMARCA4*) component of the BAF (BRG1/BRM-associated factor 60; BAF60) ATP-  
346 dependent SWI/SNF chromatin remodelling complex in induction of IEG expression  
347 and Myh isoform switching in pathological cardiac remodelling (Deak et al., 1998b;  
348 Hang et al., 2010). The role of Brg1 in IEG induction and hypertrophic remodelling was  
349 therefore tested. Consistent with previous studies, knock down of Brg1 with siRNA  
350 prevented isoform switching between *Myh6* and *Myh7*, associated with induction of  
351 pathological hypertrophy, and abrogated *c-Fos* induction in ET-1 stimulated NRVMs  
352 (Figure S3F-G). Having shown the involvement of Brg1 in ET-1 responses in NRVM,  
353 whether phosphorylation of H3S28 affected Brg1 occupancy at IEG promoters was  
354 next investigated. To this end, ChIP experiments were performed on NRVMs  
355 expressing DN-MSK1 ± ET-1, as in Figure 3H but using an antibody directed Brg1.  
356 Notably, as shown by greater ChIP enrichment, ET-1 stimulated increases in  
357 association of Brg1 with both the *c-Jun* and *c-Fos* promoters in NRVMs (Figure 3I).  
358 Brg1 recruitment was however prevented in DN-MSK expressing NRVMs. Further  
359 supporting these in vitro data, Brg1 was also enriched at the *c-Jun* and *c-Fos*  
360 promoters in chromatin prepared from hearts from Wistar rats infused with ET-1 or Iso  
361 for 15 min (Figure 3J).

362 Collectively, these data demonstrate that MSK-mediated phosphorylation of histone  
363 H3S28 at the promoter regions of IEGs is a necessary event for the recruitment of the

364 chromatin remodelling complex to these promoters required for IEG expression and  
365 hypertrophic remodelling subsequent to GPCR stimulation.

366

367 **MSK1/2 expression is required for the hypertrophic response in vivo.**

368 The data above indicate a role for MSK in the induction of hypertrophic responses in  
369 vitro and that the MSK/pH3S28/Brg1/IEG pathway is acutely engaged following  
370 neurohumoral stimulation in vivo. The requirement for MSK1/2 for activation of this  
371 pathway and induction of hypertrophy was next examined in vivo using a mouse model  
372 in which both alleles of *Msk* had been deleted by homologous recombination (*Msk1/2*  
373 *<sup>-/-</sup>*; *Msk* KO) (Wiggin et al., 2002a). Specifically, wild type (WT) and *Msk* knockout  
374 (KO) mice were subjected to osmotic mini-pump infusion of Iso for one week, after  
375 which the activation of the MSK pathway and hypertrophy induction was measured.  
376 During this one week infusion, the initial adaptive remodelling associated with  
377 pathological hypertrophy would be expected.

378 The activation of the MSK/pH3S28/Brg1/IEG pathway axis during the one week Iso  
379 infusion and how it was affected by loss of *Msk1/2* was first assessed. As expected for  
380 the *Msk* KO mice, *Msk1* and *Msk2* transcripts were absent in heart tissue in this mouse  
381 (Figure 4A). *Msk1* and *Msk2* mRNA levels were also measured in the iso infused WT  
382 mice and found to be significantly upregulated after 1 week (Figure 4A). Notably, Iso-  
383 infused WT mice exhibited significant increases in expression of IEGs including *c-Fos*  
384 and *c-Jun* and in line with its role in IEG induction of *Smarca4* (the gene encoding  
385 Brg1) (Figure 4B-C). Consistent with the importance of MSK1/2 in the IEG response,  
386 Iso induction of *c-Fos*, *c-Jun* and *Smarca4* expression was reduced in these mice when  
387 compared to similarly treated WT controls (Figure 4B-C). Levels of nuclear pMSK and



388 pH3S28 (demarcated by Pcm-1 or Nesprin perinuclear staining (Thienpont et al., 2017)  
389 in cardiomyocytes in sections prepared from Iso-infused WT and KO animals were also  
390 significantly lower in KO animals than WT at baseline and were not affected by Iso,  
391 indicating inactivation of the MSK/pH3S28 pathway (Figure 4D-E). While significantly  
392 higher than in KO at baseline, no significant effect of Iso on pMSK or pH3S28 was  
393 however observed in WT cardiomyocytes.

394 We tested whether upregulation of IEGs, *Smarca4* and *Msk1/2* was a feature of other  
395 models of hypertrophic remodelling. In line with these findings in Iso infused mice, an  
396 upregulation of IEGs, *Smarca4* and of *Msk1/2* was detected in cardiomyocytes from  
397 rats subjected to constriction of the ascending aorta (AB) for 6 weeks (a model of  
398 pathological hypertrophy) (Thienpont et al., 2017) (Figure S4A). Indicative of a specific  
399 role of this IEG response to pathological cardiac remodelling, no such upregulation  
400 was detected in cardiomyocytes from rats subjected to treadmill training for 6 weeks,  
401 which exhibited physiological cardiac remodelling, with a similar degree of hypertrophy  
402 as the AB rats (Thienpont et al., 2017) (Figure S4A). *Msk1* and 2 mRNA levels were  
403 also increased in NRVMs after 24 h of ET-1 stimulation (Figure S4B).

404 Having confirmed the engagement of the MSK/pH3S28/Brg1/IEG pathway in Iso-  
405 infused mice, and the requirement for MSK1/2 for phosphorylation of H3S28 and  
406 induction of IEG, hypertrophic remodelling was assessed in these animals. Cardiac  
407 function and geometry were measured in vivo by 2D echocardiography prior to the start  
408 of the experiment (baseline) and after one week of Iso infusion. In line with the reported  
409 lack of an overt phenotype in *Msk* double KO mice, no differences in cardiac function,  
410 indicated by fractional shortening (FS) or of posterior wall thickness (PWd) were  
411 detected between control WT and KO animals at baseline (Figure 4F and S4C).  
412 Following one week Iso infusion, whereas control mice exhibited significant increases

413 in PwD and FS, typical of the initial stages of pathological hypertrophic remodelling  
414 (Selvetella et al., 2004), these responses to Iso were absent in *Msk* KO mice (Figure  
415 4F-G and S4C).

416 The hypertrophic response to Iso infusion was also assessed by RT-qPCR analysis of  
417 components of the foetal gene program. As would be expected, Iso infusion resulted  
418 in increased expression of *Nppa*, *Nppb* and *Myh7* in WT mice (Figure 4H). The  
419 expression of these hypertrophic markers was not however induced following Iso  
420 infusion in *Msk* KO mice, thereby supporting the requirement for Msk for the  
421 hypertrophic response observed in vitro.

422 Fibrosis is a feature of pathological hypertrophy, including following Iso infusion that  
423 contributes to disease progression. Histological analysis of LV tissue sections revealed  
424 a significant increase in interstitial fibrosis following Iso infusion in control mice that  
425 was absent in the *Msk* KO mice (Figure 4I and S4D). Supporting the histology analysis,  
426 *Col1a1* mRNA was substantially increased in Iso infused WT mice that was absent in  
427 similarly treated *Msk* KO mice (Figure 4J).

428 Fibrosis is a natural response to increased cardiomyocyte death in the myocardium.  
429 Given the association between cardiomyocyte viability and the activity of MAPK  
430 pathways, we assessed whether reduced cell death was contributing to the protective  
431 effects of *Msk* KO. TUNEL staining of heart sections revealed a significant Iso-  
432 dependent increase in cell death in WT mouse hearts that was not observed in *Msk*  
433 KO mice (Figure S4E). Baseline cell death was similar between WT and *Msk* KO  
434 mouse hearts. The expression of key anti- and pro-apoptotic mediators was analysed  
435 (Figure S4F and G). Expression of executioner caspases 3 and 9 (*Casp3* and *Casp9*)  
436 of apoptosis and of *Bax*, a pro-apoptotic BH3 only family member, were increased

437 following Iso in WT mice, whereas their expression was not induced in the *Msk* KO  
438 mouse (Figure S4F). Notably, *Bcl2*, which exhibits anti-apoptotic activity, was  
439 increased in the *Msk* KO mouse following Iso infusion (Figure S4G).

440 Together these data show that consistent with that observed in vitro, MSK activity is  
441 required for the induction of hypertrophy in vivo, and that in its absence, hearts are  
442 protected from pathological insult.

443

#### 444 **The MSK1/2/pH3S28/BRG1/IEG axis is engaged in human hypertrophic** 445 **remodelling**

446 Having shown an important role of MSK1/2 in IEG and hypertrophy induction in cellular  
447 models and in vivo in rodents, we analysed whether the MSK1/2/pH3S28/IEG axis was  
448 conserved in GPCR responses and hypertrophic remodelling in human. To this end,  
449 the activation of MSK and phosphorylation of H3S28 following application ET-1 and  
450 Iso was first analysed in acutely isolated ventricular cardiomyocytes from explanted  
451 non-failing donor hearts. The involvement of MAPK activity was also tested.  
452 Stimulation of human cardiomyocytes resulted in a significant increase in levels of  
453 pMSK and pH3S28 (Figure 5A-B). Consistent with our findings in rat ventricular  
454 cardiomyocytes, these phosphorylation events were abrogated by inhibition of the  
455 ERK1/2 pathway with PD.

456 To gain insight into the involvement of MSK and IEG in human disease, the expression  
457 of MSK1/2, IEGs and early response gene target *SMARCA4* was compared between  
458 cardiomyocyte nuclei purified from healthy and hypertrophic human hearts. As in  
459 rodents, expression of MSK1/2, IEG components of the AP-1 transcription factor and  
460 *SMARCA4* were substantially upregulated in hypertrophic cardiomyocytes (Figure 5C-

461 E). We next analysed pH3S28 in the promoters of *c-FOS*, *C-JUN* and *SMARCA4* by  
462 ChIP. Notably, pH3S28 enrichment was observed at all three promoters in  
463 hypertrophic compared with healthy control hearts (Figure 5F-G).

464 Together, these data show conservation of the MSK pathway to IEG induction in  
465 human hearts and support our hypothesis that the MSK/pH3S28/IEG pathway is  
466 necessary to bring about the initial stages of the pathological hypertrophic response in  
467 cardiomyocytes (Figure 6).

468

## 469 **Discussion**

470 MAPK regulation of immediate early gene activity and expression is key to stress-  
471 mediated induction of cardiac hypertrophic responses. Here we identified MSK1/2, a  
472 kinase activated downstream of ERK1/2, as being necessary for the initiation of IEG  
473 expression in response to pathological hypertrophic cues. MSK1/2 elicited this  
474 response through phosphorylation of histone 3 at Ser 28 allowing recruitment of the  
475 ATP-dependent chromatin remodeller, Brg1. In the absence of this response,  
476 hypertrophic gene expression and cardiac remodelling was attenuated. Notably, live-  
477 cell functional assays and analysis of post-mortem human hypertrophic hearts  
478 revealed that this pathway was conserved in humans. These data are summarised in  
479 the cartoon in Figure 6.

480 The hypertrophic response of the pathologically stressed myocardium is mediated  
481 through an extensive remodelling of the cardiomyocyte transcriptome (Selvetella et al.,  
482 2004; Song et al., 2012). Contributing to the initiation of this process as well as being  
483 required for its manifestation are AP-1 transcription factors, that comprise  
484 heterodimers of, but not restricted to, the proto-typical IEGs *c-FOS* and *c-JUN* (Chiu et  
485 al., 1988; Hess et al., 2004). Through their signal responsive phosphorylation, AP-1

486 are acutely activated in response to hypertrophic stimuli and upon phosphorylation  
487 associate with cognate response elements in the promoters of their encoding genes  
488 as well as numerous other targets, thereby promoting a rapid induction of their  
489 expression. Consistent with previous work from our laboratory and others and this  
490 established paradigm for AP-1 activity in the heart, we show here that the expression  
491 of these IEGs is increased within minutes of exposure of cells to hypertrophic agonists,  
492 both in vitro, and importantly in vivo (Archer et al., 2017). As revealed by use of  
493 dominant negative AP-1 components shown here and in previous studies, the  
494 induction of these early response genes, which include many transcription factors, is  
495 important in mediating later phases of the hypertrophic response (Hilfiker-Kleiner et al.,  
496 2006; Petrich et al., 2003).

497

#### 498 **ERK1/2 in the heart**

499 Activation of the ERK1/2 MAPK pathways is a conserved feature of many hypertrophic  
500 stressors ((Bueno et al., 2000)( 20959622)). This signalling cascade is activated  
501 following receptor engagement at the plasma membrane and culminates in induction  
502 of hypertrophic gene expression. As we show here and described elsewhere,  
503 expression of immediate early genes occurs in vitro and in vivo within minutes of  
504 exposure to hypertrophic agonist, and is the first transcriptional readout of MAPK  
505 activation. Indeed, we show that ERK1/2 activation mirrors the temporal profile of IEG  
506 induction. Moreover, in the absence of ERK activity, hormone stimulated AP-1  
507 activation, IEG induction and expression of markers of hypertrophy in myocyte cultures  
508 is prevented in vitro and in vivo (Liu et al., 2016). Notably, while ERK and IEG activity  
509 peak proximal to the initiating stimulus, despite a lack of detectable activity subsequent

510 to this peak, ERK inhibition prevents hypertrophic gene expression (Archer et al.,  
511 2017).

512 While we, as others, show an involvement of ERK1/2 and activation of IEGs in the  
513 mechanism underlying pathological hypertrophic remodelling, the role of ERK1/2 in  
514 hypertrophy in vivo is complex. Whereas in vivo overexpression of ERKs is not  
515 sufficient to induce a hypertrophic response, overexpression of its direct upstream  
516 kinase MEK induces a concentric hypertrophic response (Mutlak and Kehat, 2015).  
517 However, overexpression of the small GTPase protein Ras, which lies between GPCR  
518 activation and ERK activation, results in cardiomyopathy (Wu Guangyu et al., 2001).  
519 Recent elegant strategies involving conditional or tissue specific manipulation of each  
520 isoform to overcome embryonic lethality of the genetic KO now provide a clearer view  
521 of the contribution of this pathway to the cardiac hypertrophic response (Kehat et al.,  
522 2011; Purcell et al., 2007; Ulm et al., 2014). Loss of ERK2, which represents 50-70 %  
523 of ERK activity in the heart attenuates the initial compensatory phase of the  
524 hypertrophic response and a direct progression to a cardiomyopathic phenotype.  
525 Significantly, this cardiomyopathic phase is associated with substantial cardiomyocyte  
526 death, which would indicate that ERK2 elicits a protective anti-apoptotic effect upon  
527 the cardiomyocyte (Ulm et al., 2014). Surprisingly, conditional deletion of both ERK  
528 alleles did not prevent pathological hypertrophic growth (Kehat et al., 2011). Further  
529 analysis revealed a selective role of ERK1/2 in the different forms of hypertrophy -  
530 while ERK1/2 mediates concentric growth responses to stimulus, as evidenced by  
531 dilation and decreased function of ERK1/2 KO mice as well as induction of fetal genes,,  
532 it prevents eccentric growth (Bueno et al., 2000; Kehat et al., 2011; Purcell et al., 2007).  
533 Surprisingly, cardiomyocyte-specific loss of *Erk2* in mice did not affect physiological  
534 cardiac remodelling in response to 4 weeks of swimming training, indicating

535 independent pathways for adaptive hypertrophy in response to pathological or  
536 physiological stimuli (Ulm et al., 2014).

537 These diverse data from these different experimental models are perhaps not  
538 surprising given the complex regulation of this pathway, involving feedback at multiple  
539 levels that act to prevent constitutive activity. Together, these experimental findings  
540 suggest that ERK signalling contributes to acute, adaptive hypertrophic growth while  
541 repressing maladaptive growth thereby protecting the heart from maladaptive  
542 remodelling and progression to failure. A similar role is also suggested of certain AP-1  
543 components where in their absence, the hypertrophic response is less adaptive in  
544 nature (Windak et al., 2013).

545

#### 546 **MSK in the heart**

547 As indicated above, ERK1/2 signalling is critical for transduction of hypertrophic cues  
548 to activation of IEG expression and induction of hypertrophy. Moreover, ERK1/2  
549 phosphorylates hypertrophy-related transcription factors to modulate the activation.  
550 Phosphorylation of histone H3 at S10 and S28 has also been described as key events  
551 in the pathway indissociably linking MAPK activation and induction of IEG expression  
552 in response to mitogenic stimulation (Clayton and Mahadevan, 2003; Clayton et al.,  
553 2000). MAPK cannot however directly phosphorylate H3S28 and S10 but act via an  
554 intermediate kinase, which in fibroblastic cells was identified as the mitogen and stress  
555 activated kinase MSK1/2. MSK1/2 are promiscuous nuclear serine/threonine proteins.  
556 MSK is activated either through ERK1/2 or p38 MAPK cascades, resulting in  
557 phosphorylation of the MSK C-terminal Ca<sup>2+</sup>/calmodulin-dependent protein kinase  
558 (CaMK)-like domain, leading to a positive feed forward autophosphorylation event at

559 the N-terminal AGC-like kinase domain (Roux and Blenis, 2004). The phosphorylated  
560 activated N-terminal domain then phosphorylates other substrates, including histone  
561 H3. Our study provides the first evidence for a role for MSK in promoter histone H3  
562 phosphorylation and IEG induction in cardiomyocytes. Although MSK was identified as  
563 the kinase responsible for phosphorylation of histone H3 and which was required for  
564 robust IEG activation in cultured fibroblasts (Soloaga et al., 2003), the data presented  
565 here are the first demonstration that phosphorylation of H3S28 is mediated by MSK in  
566 response to pathological stressor in cardiomyocytes, and further that this event is  
567 required for IEG activation and mounting of the cardiomyocyte hypertrophic response.  
568 The specific role for MSK1/2 in responding to stress stimuli is consistent with the lack  
569 of overt phenotype in *Msk1/2* double KO mice (Wiggin et al., 2002b).

570 Histone H3 Ser 28 phosphorylation at IEG promoters is an important step in the  
571 induction of their expression. This phosphorylation event results in increased  
572 recruitment of BRG1, a component of the SWI/SNF remodelling complex to chromatin  
573 (Hang et al., 2010). Appropriate localisation of this complex to chromatin is likely a key  
574 step in bringing about the required transcriptional response. Notably, BRG1 is an  
575 important mediator of chromatin remodelling and transcriptional responses in cardiac  
576 development and disease. Indeed, BRG1 together with HDAC and PARP is recruited  
577 to the *Myh6/7* locus and is involved in bringing about the isoform switching of myosin  
578 heavy chain during cardiac maturation and in response to stress. The lack of BRG1  
579 recruitment following DN-MSK expression described here would support these  
580 previous observations. Based on our data, we propose that H3S28 phosphorylation by  
581 MSK is an initial step in mediating this hypertrophic response. The recruitment of BRG1  
582 further contributes to modulation of the epigenetic landscape of the heart through  
583 recruiting factors including EZH2 to acetylate H3K27 at enhancers of the mesoderm



584 and for Polycomb-mediated repression of non-mesodermal genes (Gehani et al.,  
585 2010). Such a role for MSK-mediated phosphorylation of H3S28 is described in  
586 neuronal differentiation, where MSK1/2 phosphorylates and targets H3S28 in  
587 promoters with Polycomb repressor complex 2 (PRC2) – bound methylated H3K27,  
588 thereby displacing PRC2 for gene activation (Gehani et al., 2010). H3K27me3 is also  
589 lost at activated gene promoters in hypertrophy and disease in cardiomyocytes  
590 (Gilsbach et al., 2014; Thienpont et al., 2017). Whether loss of this mark is associated  
591 with gain of H3S28 phosphorylation is not determined in cardiomyocyte transcriptional  
592 responses, although elsewhere, phosphorylation of H3S28 has been shown to  
593 displace the PRC complex allowing H3K27 acetylation (Kim et al., 2012). Together,  
594 these data suggest that MSK-mediated phosphorylation of H3S28 is important in  
595 bringing about epigenetic changes underlying cardiac development and in the  
596 responses to hypertrophic cues.

597 Phosphorylation of histone H3 has previously been described in cardiomyocytes, albeit  
598 in the context of a bona fide hypertrophic response. In chronic remodelling in response  
599 to sustained sympathetic activation, CaMKII was found to bind directly and  
600 phosphorylate H3S28. In end-stage heart failure as well as in a murine model, CaMKII-  
601 mediated phosphorylation of H3S28 in the haemoglobin promoter results in enhanced  
602 expression in adult cardiomyocytes (Saadatmand et al., 2019). Whether this particular  
603 mechanism is protective or contributes to the pathological phenotype is undetermined.  
604 Importantly, CaMKII was found necessary for sustained elevation of global pH3S28,  
605 with major differences compared with control seen after 24 h catecholaminergic  
606 stimulation (Saadatmand et al., 2019). While CaMKII may indeed play a role at certain  
607 gene loci, the decrease in H3S28 phosphorylation in *Msk* KO animals, suggests that  
608 MSKs make an important contribution to maintaining phosphorylation of H3S28,

609 particularly at IEG loci shown here, during disease remodelling. CaMKII is also shown  
610 to phosphorylate H3S10 leading to the induction of cardiac foetal genes (Awad et al.,  
611 2013). Notably, in the latter study, no CaMKII dependent phosphorylation of H3S28  
612 was detected. The nuclear localisation of this kinase together with its identified role in  
613 HDAC phosphorylation provides a mechanism to remodel chromatin in a manner  
614 optimal for stimulation of MEF2-dependent gene expression during hypertrophic  
615 remodelling (Awad et al., 2013; Backs et al., 2006). CaMKII-associated pH3S10 is also  
616 sustained in end-stage heart failure (Awad et al., 2015). As we did not detect a robust  
617 change in H3S10 phosphorylation in NRVMs exposed to hypertrophic stimuli, we did  
618 not examine phosphorylation of this residue in disease in vivo. Together, CaMKII  
619 phosphorylation of H3S10 and H3S28 and H3S28 phosphorylation by MSK represent  
620 a potential mechanism that permits different stimuli at different phases of their action  
621 to selectively control the expression of discrete panels of target genes.

622 Consistent with studies elsewhere, we show that MSK lies downstream of ERK1/2,  
623 requiring ERK activity for function (Markou and Lazou, 2002) (Figure SB). MSK is also  
624 modified by p38 MAPK, which has been proposed to be required in addition for ERK1/2  
625 for activation and in mediating pathological cardiac stress responses. Further, MSK is  
626 proposed to induce hypertrophic responses via CREB in a manner that also requires  
627 PKA (Markou et al., 2004). These studies were however constrained by the poor  
628 pharmacology of MSK with drugs used targeting PKC and PKA in the nM range (Alessi,  
629 1997; Naqvi et al., 2012). Since in agreement with other studies, ERK inhibition was  
630 sufficient to prevent MSK activation and its regulation of effectors, we did not probe  
631 further the role of p38. Notably, as well as showing increased phosphorylation of sites  
632 indicative of its activation, *MSK1/2* gene expression was induced in response to  
633 hypertrophic stimulation both in vitro and in vivo. *MSK1/2* expression was also

634 maintained in more chronic situations, further underlining the importance of this kinase  
635 in early responses to stress as well as in potentially sustaining its function. The  
636 persistence of IEG expression in the 6 week rat model of hypertrophic remodelling and  
637 in human disease may support this notion.

638 Other targets of MSK involved in the cardiac hypertrophic response have been  
639 described. The first substrate of MSK identified was the cAMP-Responsive Element-  
640 Binding Protein (CREB) transcription factor, which binds cAMP response DNA  
641 elements (CRE), associating with the histone acetyltransferase CREB-binding protein  
642 (CBP/P300) to activate transcription. CREB itself is also phosphorylated by a number  
643 of different kinases, including protein kinase A (PKA) (Johannessen et al., 2004). The  
644 role of MSK-activated CREB in vivo is controversial. Several studies have  
645 demonstrated that PKA- but not MSK-mediated CREB phosphorylation leads to CBP  
646 or p300 recruitment (Kasper et al., 2011). Cardiac-specific expression of a dominant  
647 negative form of CREB (DN-CREB) leads to a dilated cardiomyopathy phenotype  
648 (Watson et al., 2010). Given the extreme phenotype of DN-CREB in contrast to the  
649 relatively benign *Msk1/2* double KO, it is likely that normal CREB activity is  
650 independent of MSK in the heart. Related to its role in the nucleosomal response, MSK  
651 phosphorylates high mobility group 14 protein (HMG-14). This protein associates with  
652 phosphorylated H3 at activated promoters (Soloaga et al., 2003). Its role in chromatin  
653 remodelling remains elusive and its relationship with MSK and H3 phosphorylation  
654 remains however, to be determined (Phair and Misteli, 2000).

655

656 **Pharmacology of MSK for therapeutic targeting**

657 The lack of a significant cardiac phenotype of *Msk1/2* KO that we describe suggests a  
658 limited role of MSK in the basal activity of cardiomyocytes. The stress-specific function  
659 of MSK may endow it however with possessing the necessary qualities of being  
660 therapeutically targetable. To date, no highly specific drugs suitable for in vivo use are  
661 available and those that are show efficacy at multiple other kinases important in cardiac  
662 remodelling, the use of which would preclude identification of MSK mechanisms of  
663 action and role in the heart (Naqvi et al., 2012). Specific inhibitors of kinases upstream  
664 of MSK, including members of the ERK/MAPK pathway have also been employed. The  
665 role of these kinases in the baseline activity of the heart is more significant making  
666 them less ideal targets for therapy.

667

## 668 **Conclusion**

669 Our data identified MSK as the missing link between ERK/MAPK activation, histone  
670 H3S28 phosphorylation, IEG induction and cardiomyocyte hypertrophy induction.  
671 Further studies will lead to the identification of the wider significance of MSK-induced  
672 pH3S28 in the hypertrophic response and how it may be manipulated for therapeutic  
673 benefit.

674

## 675 **Materials and Methods**

### 676 **Reagents**

677 Chemicals purchased were from Sigma Aldrich and molecular biology reagents were  
678 from Thermo Scientific and Life Technologies, unless stated otherwise. Tables of

679 antibodies and primers used in this study are included in Supplementary Tables and 3  
680 and 4 respectively.

681

## 682 **Animal experiments**

683 All experiments involving animals were in accordance with the European Directive  
684 2010/63/EU. Experiments were performed in accordance with the UK Home Office and  
685 institutional guidelines or were approved by the Ethical Committee for Animal  
686 Experiments of the KU Leuven (Belgium). The Msk1/2 null animals have been  
687 previously described (Arthur and Cohen, 2000; Wiggin et al., 2002b). Hypertrophic  
688 remodelling was induced in 8-10 week old male mice animals by administration of  
689 isoproterenol (Iso, Sigma-Aldrich) at 10 mg/kg/day for one week via osmotic mini-  
690 pumps (Alzet) implantation as previously described and under project license  
691 P3A97F3D1 (Liu et al., 2009). Jugular vein infusion of ET-1 and Iso was performed as  
692 previously described (Archer et al., 2017) using an approved experimental protocol  
693 (license number P055/2017) approved by the Ethical Committee for Animal  
694 Experiments of the KU Leuven (Belgium), explained in detail later. Male Sprague  
695 Dawley rats subjected to six weeks of ascending aortic banding or a six-week treadmill  
696 training program were previously used to generate cardiomyocyte-specific nuclear  
697 (PCM-1 positive) RNA-sequencing data as previously described (Thienpont et al.,  
698 2017). RNA sequencing data was re-purposed for this study, focusing on the panel of  
699 IEGs. The sequencing data are available in the NCBI's Gene Expression Omnibus  
700 (GEO) database (GEO GSE66653). Animals were housed and treated according to  
701 the European Directive 2010/63/EU.

702

703 **Echocardiography**

704 Mice were anesthetised with Avertin (200 mg/kg). Cardiac function was assessed by  
705 transthoracic 2D M-mode echocardiography using an Acuson Sequoia C256  
706 ultrasound system (Siemens) as previously described (Liu et al., 2009).

707

708 **Preparation of neonatal rat ventricular myocytes (NRVMs)**

709 Primary neonatal rat ventricular myocytes (NRVMs) were isolated from 3-4 day old  
710 male and female Wistar pups and cultured as described previously (Higazi et al., 2009).  
711 Cultures were > 95 % pure. NRVMs were seeded at a density at which they exhibited  
712 spontaneous and synchronous beating throughout the experiment. 48 h after seeding,  
713 NRVMs were washed into serum-free medium (DMEM/M199 4:1, 1 mM sodium  
714 pyruvate, 5.5 µg/mL transferrin, 5 ng/mL sodium selenite, 1 X Antibiotic-Antimycotic  
715 (Life Technologies), and 3 µM cytosine b-D-arabinofuranoside (araC) and serum-  
716 starved for 24 h. NRVMs were subsequently stimulated with the agents described.  
717 Adenoviral infections were performed by incubation with a volume of virus-containing  
718 serum-free medium sufficient to cover the cells for 4 h. Agonist treatments diluted in  
719 serum-free medium were applied 24 h post-infection with adenovirus. Endothelin-1  
720 (ET-1, Millipore), isoproterenol hydrochloride (Iso, Sigma Aldrich) and PD184352 (PD,  
721 Sigma Aldrich) treatments were performed at a final concentration of 100 nM, 10 nM  
722 and 1 µM respectively. All cellular treatments with PD were pre-treated with PD for 30  
723 min prior to hypertrophic agonist application (ET-1/Iso). Control cellular experiments  
724 (no treatment) were treated with the same volume of vehicle only (DMSO for ET-1 and  
725 PD).

726

727

## 728 **Isolation and culture of adult rat ventricular myocytes (ARVMs)**

729 Male Wistar rats (Harlan; ~200 g) were anaesthetised by CO<sub>2</sub> inhalation and killed by  
730 cervical dislocation. ARVMs were isolated by collagenase digestion following  
731 Langendorff perfusion as previously described and cultured in adult cardiomyocyte  
732 medium (M199, 1 % penicillin-streptomycin-l-glutamine, 0.2 % bovine serum albumin  
733 (BSA)) on laminin-coated (25 µg/ml) dishes (Drawnel et al., 2012). Adenoviral  
734 infections were performed for 12 h in a minimal volume of virus-containing medium.  
735 For experiments involving acute stimulation with ET-1 and Iso, cells in Tyrode were  
736 plated onto laminin-coated 8 well Nunc cover glasses cells, allowed to attach for 1 h at  
737 37 °C, after which the Tyrode solution was replaced with Tyrode containing DMSO  
738 vehicle or Tyrode containing 10 nM PD. After 20 min, buffer was exchanged for Tyrode  
739 containing 100 nM ET-1 or 10 nM Iso ± PD. After 15 min, dishes were placed on ice  
740 and processed for immunostaining and imaging.

741

## 742 **Isolation of human ventricular cardiomyocytes**

743 Donor human tissue was collected under a study protocol approved by the ethical  
744 committee of UZ Leuven (S58824), conformed to the Helsinki declaration, and was  
745 conducted in accordance with the prevailing national and European Union regulations  
746 on the use of human tissues. Donor information is displayed in Table S1.

747 Human ventricular myocytes were prepared from the explanted hearts immediately  
748 after removal as previously described (Dries et al., 2018). The explants hearts were  
749 collected in ice-cold modified Tyrode's solution at the time of surgery (in mM: NaCl  
750 130, KCl 27, HEPES 6, MgSO<sub>4</sub> 1.2, KH<sub>2</sub>PO<sub>4</sub> 1.2, glucose 50; pH 7.2 with NaOH) and

751 transported to the lab. A wedge of the left ventricle with its perfusing coronary artery  
752 was cannulated. If possible, a wedge from the left anterior descending artery was  
753 cannulated, otherwise a left circumflex branch was used. The artery and the tissue was  
754 perfused at 37 °C with a Ca<sup>2+</sup>-free Tyrode's solution (in mM: NaCl 130, KCl 5.4, HEPES  
755 6, MgSO<sub>4</sub> 1.2, KH<sub>2</sub>PO<sub>4</sub> 1.2, glucose 20; pH 7.2 with NaOH) for 30 min followed by  
756 enzyme perfusion for 40 min (collagenase A, Roche and protease XIV, Sigma Aldrich  
757 in Ca<sup>2+</sup>-free solution) and after digestion, perfused with low Ca<sup>2+</sup> Tyrode (Ca<sup>2+</sup>-free  
758 solution with 0.18 mM CaCl<sub>2</sub> added). The digested tissue was minced, the suspension  
759 was filtered and the isolated myocytes were resuspended in normal Tyrode. After  
760 isolation, the cells were allowed to recover for 1 h before starting experiments or  
761 fixation. For experiments involving stimulation with Iso or ET-1, cells were plated onto  
762 poly-L-lysine coated 8 well Nunc cover glasses and allowed to attach for 1 h at 37 °C.  
763 After this period the Tyrode solution was replaced with Tyrode containing DMSO  
764 vehicle or Tyrode containing 1 μM PD. After 20 min, buffer was exchanged for Tyrode  
765 containing 100 nM ET-1 or 10 nM Iso ± PD. After 15 min, dishes were placed on ice  
766 and processed for immunostaining and imaging.

767

#### 768 **Isolation of human cardiomyocyte nuclei**

769 Nuclei from post-mortem left ventricular tissue were isolated and flow sorted according  
770 to pericentriolar material 1 (PCM-1) staining as previously described (Bergmann and  
771 Jovinge, 2012). 500,000 nuclei were sorted into 1 ml TRIzol reagent for RNase  
772 inhibition prior to RNA isolation. Human LV samples were obtained from the KI  
773 Donatum, Karolinska Institutet, Stockholm, Sweden, with permission for the analysis  
774 of human tissue for research purposes granted by the Regional Ethics Committee in



775 Stockholm, Sweden. Donor information from which LV cardiomyocyte nuclei were  
776 isolated is displayed in Table S2.

777

## 778 **Histology and section preparation**

779 Adult hearts were dissected from *Msk1/2* KO mice and covered in a layer of Tissue-  
780 Tek optimum cutting temperature (OCT) in Tissue-Tek® Cryomold® Molds (15x15x15  
781 mm) and flash-frozen in liquid nitrogen-cooled isopentane (VWR). 10 µm ventricular  
782 sections were cut using a Leica cryostat and attached to SuperFrost Plus™ slides  
783 (VWR). Slides were frozen at -20 °C prior to immunostaining.

784 Sections were thawed and rehydrated in phosphate buffered saline (PBS) for 5 min,  
785 followed by 15 min fixation in 4 % paraformaldehyde (PFA). After three washes (5 min  
786 each) in PBS, sections were permeabilised for 30 min in 0.2 % Triton X-100 in PBS  
787 (PBS-TX), then washed twice with PBS. Non-specific protein binding sites were  
788 blocked by incubation in PBS-TX containing 3 % BSA or 5 % goat serum for 1 h.  
789 Primary antibodies were diluted in blocking buffer and incubated overnight at 4 °C. After  
790 overnight incubation, slides were washed X3 in PBS and secondary antibodies added  
791 in blocking buffer for 1 h at room temperature. After incubation, the slides were washed  
792 and mounted in VECTASHIELD Antifade Mounting Medium containing DAPI  
793 (Vectorlabs). Confocal images were acquired using a Nikon A1R confocal microscope  
794 using a 40X 1.3 Numerical Aperture (N.A.) oil immersion objective.

795

## 796 **Picro Sirius Red staining for fibrosis analysis**

797 10  $\mu\text{m}$  thick sections were cut from OCT embedded tissue as above. Subsequently,  
798 sections were rehydrated and stained for collagen using a Picro Sirius red staining kit  
799 (PolySciences). After staining, sections were mounted in dibutylphthalate polystyrene  
800 xylene mounting medium. Images were acquired using a Zeiss Axioplan microscope  
801 configured with an AxioCam Hrc camera. Polarization microscopy was performed on  
802 the Sirius red stained sections to visualize collagen type I and III based on the  
803 birefringence properties of collagen. The degree of fibrosis was quantified using  
804 Axiovision analysis software.

805

### 806 **Immunofluorescence analysis**

807 Analysis of surface area of NRVM was carried out as previously described (6). Briefly,  
808 NRVMs for immunofluorescence were cultured and fixed in black 96-well imaging  
809 microplates (BD Biosciences). NRVMs were immunostained with primary antibodies  
810 against  $\alpha$ -Act and ANF and detected using Alexa Fluor 488 and 568-coupled  
811 secondary antibodies (Table S3). After immunostaining, nuclei were labelled with  
812 Hoescht (1  $\mu\text{g}/\text{ml}$  in PBS for 20 min). Images were captured using a BD Pathway 855  
813 high-content imaging system and Attovision software. Cell planimetry was performed  
814 using ImageJ by drawing around the edge of the cells (NIH). At least 400 cells from  
815 three independent experiments were analysed. These images were also used for  
816 quantification of ANF protein expression as determined by counting the number of  
817 NRVM exhibiting a peri-nuclear ring of ANF.

818 For confocal imaging, NRVMs were cultured in 16-well chamber slides (Nunc). Slides  
819 were mounted onto a coverslip using VECTASHIELD Mounting Medium containing  
820 DAPI and sealed with clear nail varnish.

821 For staining of ARVMs and human isolated cardiomyocytes, cells were fixed and  
822 permeabilised in ice-cold 100 % methanol and incubated at -20 °C for 10 min. Methanol  
823 was washed from the coverslips twice with PBS and further permeabilisation  
824 performed by the addition of 0.5 ml ice-cold 100 % acetone and incubation at -20 °C  
825 for 1 min. Following an additional two washes in PBS, antibody labelling was performed  
826 as described for NRVM. To further reduce background staining, blocking and  
827 secondary antibody buffers contained 1 % BSA in addition to goat serum.

828 Immunofluorescence analysis of cardiac sections was performed as previously  
829 described (8). Snap-frozen heart samples were embedded in OCT (VWR), cryo-  
830 sections (thickness 10 µm) were collected on SUPERFROST PLUS microscope slides  
831 (VWR), fixed in 4 % PFA in PBS for 15 min, permeabilised in 0.25 % Triton-X100 in  
832 PBS for 15 min, and blocked in 5 % Chemibloc in PBS with 0.1 % Triton-X100 (PBS-  
833 TX) for 1 h. Sections were subsequently incubated overnight at 4°C in blocking buffer  
834 with primary antibodies as per Table S3. Samples were washed extensively in PBS-  
835 TX, and incubated with Alexa Fluor® secondary antibodies (Invitrogen) at 1:500 in  
836 PBS-TX for 1 h at room temperature. Where required, DAPI was included to identify  
837 the DNA in nuclei, respectively.

838 Sections were mounted in VECTASHIELD with DAPI (Vector Labs) and imaged on a  
839 Nikon A1R confocal microscope through a Plan Fluor DIC H N 40x oil immersion  
840 objective (N.A.=1.3). Image stacks were collected over a 2 µm stack thickness (0.2 µm  
841 z-step). Image stacks were analysed with Volocity Image analysis software (version  
842 6.2.1, Perkin Elmer). Cardiac myocyte nuclei were identified by PCM-1- or Nesprin-  
843 positive labelling, as previously described (Thienpont et al., 2017).

844 Cellular apoptosis was measured in *Msk* KO mouse cardiac sections using the TACS®  
845 2 TdT-DAB In Situ Apoptosis Detection Kit (Bio-Techne Ltd).

846 Confocal images were acquired using an Olympus FV1000 point scanning microscope  
847 attached to an Olympus IX81, equipped with a 40X/1.3 NA UPlanFI oil immersion  
848 objective or using a Nikon A1R confocal attached to a Nikon Ti microscope equipped  
849 with 40X 1.3 N.A. oil immersion objective.

850

### 851 **Histone isolation by acid extraction**

852 NRVMs in 6-well dishes were washed once in ice-cold PBS. 0.5 ml of fresh ice-cold  
853 PBS was added to each well, the cells scraped and placed in pre-chilled 1.5 ml tubes.  
854 Cells were pelleted by centrifugation (10 min, 300 xg, 4 °C). PBS was removed and  
855 the pellet re-suspended in 1 ml hypotonic lysis buffer. The resuspended cells were  
856 incubated on a rotator at 4 °C, 30 rpm for 30 min. At the end of this incubation, intact  
857 nuclei were pelleted by centrifugation (10 min, 10000 xg, 4 °C). Nuclei were then  
858 resuspended in 400 µl 0.2 M H<sub>2</sub>SO<sub>4</sub> by pipetting and vortexing. Histones were acid  
859 extracted overnight at 4 °C on a rotator at 30 rpm. Following acid extraction, nuclear  
860 debris was removed by centrifugation (10 min, 16000 xg, 4 °C) and the supernatant  
861 containing isolated histones transferred to a pre-chilled tube. To precipitate proteins,  
862 100 % trichloroacetic acid was added to the supernatant in a drop-wise manner to  
863 achieve a final concentration of 25 %. The tube was gently inverted and then incubated  
864 on ice for 6 h. At the end of this period, precipitated proteins were recovered by  
865 centrifugation (10 min, 16000 xg, 4 °C). The supernatant was aspirated and acid  
866 removed from the tube by washing the pellet in 300 µl ice-cold acetone. After  
867 centrifugation (5 min, 16000 xg, 4 °C) and removal of the supernatant, the acetone  
868 wash and spin were repeated. Finally, the supernatant was gently removed and the  
869 pellet air-dried for 20 min at room temperature. The dried pellet was resuspended in

870 50 µl water and incubated overnight at 4 °C on a rotator at 30 rpm to maximise protein  
871 solubilisation.

872

### 873 **Immunoblot analysis**

874 Cultures of NRVM were washed once in ice-cold PBS after which 80 µl pre-chilled  
875 RIPA buffer was added to the dish and incubated for 5 min on ice (25 mM Tris-HCl, pH  
876 7.6, 150 mM NaCl, 0.1 % SDS, 1 % NP-40, 1 % Sodium Deoxycholate supplemented  
877 with 1 X Protease and Phosphatase inhibitor cocktails (Sigma Aldrich) . The cell lysate  
878 was transferred to a pre-chilled tube and debris removed by centrifugation (5 min, 10  
879 000 g, 4 °C). The supernatant was transferred to a clean tube and total protein  
880 concentration determined using the BCA assay (Thermo Scientific). Equivalent  
881 amounts of protein (10-30 µg) were loaded and samples prepared with LDS sample  
882 buffer (Invitrogen, final concentration 25 %) containing 2.5 % β-mercaptoethanol and  
883 boiled at 95 °C for 5 min before centrifuging briefly to remove debris.

884 Proteins were resolved on pre-cast 4-12 % NuPAGE 1.5 mm 10 well SDS gels  
885 (Invitrogen). The gels were rinsed with deionised water and placed in an X-cell  
886 Surelock Mini-cell running tank. The inner buffer chamber was filled with sufficient 1 X  
887 MOPS SDS Running buffer (Invitrogen) to cover the wells which were then rinsed with  
888 buffer expelled from a needle and syringe. 500 µl NuPAGE Antioxidant (Invitrogen)  
889 was added to the inner buffer chamber. The outer buffer chamber was filled with  
890 approximately 600 ml 1 X MOPS SDS Running buffer. 12 µl of Novex pre-stained sharp  
891 protein markers (Invitrogen) were loaded into the first well, followed by the boiled  
892 samples. Electrophoresis was performed at 200 V until the tracking dye reached the  
893 end of the gel.

894 For detection of ERK or MSK, proteins were transferred to a PVDF (0.45  $\mu\text{m}$ , Millipore)  
895 membrane, which had been activated by immersion for 100 % methanol for 15 s and  
896 then placed in deionised water for 2 min. For detection of histone H3, proteins were  
897 transferred to a nitrocellulose (0.2  $\mu\text{m}$ , Whatman). Proteins were detected with  
898 appropriate primary antibodies and HRP-conjugated secondary antibodies (Table S3).  
899 Immunoreactive bands were detected by enhanced chemiluminescence (Pierce).

900

### 901 **Reverse transcription quantitative PCR (RT-qPCR)**

902 RNA was isolated from NRVMs and ARVMs using the RNeasy Micro Kit (Qiagen) and  
903 DNA removed by an on-column DNA digestion step. RNA was isolated from adult rat  
904 LV tissue, *Msk1/2* KO mouse LV tissue and human cardiomyocytes using TRIzol  
905 reagent (Invitrogen).

906 500-750 ng RNA was reverse transcribed using Superscript II (Invitrogen), the final  
907 cDNA synthesis reaction diluted 1/10 - 1/20 in nuclease free water and stored at -20  
908  $^{\circ}\text{C}$  until required. Primer sequences were as previously described, unless otherwise  
909 indicated (Table S4), and were designed to span intron-exon boundaries to avoid  
910 amplification of genomic DNA (Higazi et al., 2009). The stability of a panel of reference  
911 genes was assessed using the GeNorm method for the experiments performed, and  
912 the most stable selected (Vandesompele et al., 2002). Three or four reference genes  
913 were selected for each set of experimental conditions for normalisation of gene  
914 expression qPCR analysis based on their stability for each set of samples and reaction  
915 conditions. Final primer concentration was 200 nM for all targets.

916 Reactions were performed on a LightCycler® 480 System (Roche) or on a CFX384  
917 (BIO-RAD) in a 384-well format using Platinum SYBR Green qPCR SuperMix-UDG

918 (Life Technologies). Expression analysis was carried out using the comparative  $\Delta\text{Ct}$   
919 method as described (Livak and Schmittgen, 2001).

920

## 921 **Chromatin-immunoprecipitation (ChIP)**

922 To NRVMs in 6-well dishes in culture medium, formaldehyde was added to a  
923 concentration of 1 % and incubated for 10 min on a rocking platform at room  
924 temperature. Cross-linking was terminated by the addition of 125 mM glycine for 10  
925 min at room temperature. After washing once in ice-cold PBS, cells were collected into  
926 0.5 ml PBS by scraping and subsequent centrifugation (5 min, 600 xg, 4 °C). Cell  
927 pellets were re-suspended in 1 ml ice-cold hypotonic membrane lysis buffer (50 mM  
928 Tris-HCl, pH 7.5, 5 mM EDTA, 140 mM NaCl, 1 % Triton X-100, 0.5 % NP-40  
929 supplemented with 1 X Protease and Phosphatase inhibitor cocktails). The released  
930 nuclei were pelleted by centrifugation (3 min, 12000 xg, 4 °C) and then re-suspended  
931 in 200  $\mu\text{l}$  SDS lysis buffer (50 mM Tris-HCl, pH 7.5, 10 mM EDTA, 1 % SDS  
932 supplemented with 1 X Protease and Phosphatase inhibitor cocktails). Cross-linked  
933 chromatin was fragmented by sonication using a pre-chilled Diagenode Bioruptor on  
934 the high power setting for three x 5 min cycles of 30 s 'on', 30 s 'off'. The sonication  
935 protocol produced fragments predominantly below 500 bp. Wash buffer + (10 mM Tris-  
936 HCl, pH 7.5, 140 mM NaCl, 1 mM EDTA, 0.5 mM EGTA, 1 % Triton X-100, 0.1 % SDS  
937 and 0.1% Na deoxycholate supplemented with 1 X Protease and Phosphatase inhibitor  
938 cocktails) was then added to the lysate. After removal of remaining debris by  
939 centrifugation (10 min, 12000 xg, 4 °C), the supernatant (sonicated chromatin) was  
940 processed for immunoprecipitation.

941 Proteins of interest were precipitated using antibodies pre-conjugated to Dynabeads  
942 Protein A (Invitrogen). To this end, beads were washed in 4 changes of wash buffer  
943 and collected by the use of a DynaMag Magnet. Per ChIP, 10  $\mu$ l washed beads and 5  
944  $\mu$ g Brg1 or phosphorylated H3S28 antibody were added to 90  $\mu$ l wash buffer and  
945 incubated for two h at 40 rpm on a rotator at 4 °C. For the negative control ChIP, beads  
946 were used in the absence of specific antibody.

947 Prior to IP, wash buffer was removed from pre-prepared antibody-bead complexes and  
948 200  $\mu$ l chromatin added to each tube. 200  $\mu$ l chromatin was reserved from each  
949 experimental condition as an Input sample. Chromatin was incubated with the  
950 antibody-bead complexes overnight at 4 °C on a 40 rpm rotator after which unbound  
951 chromatin was washed from the beads. Wash buffer was used for the first two washes,  
952 followed by one wash in high-salt wash buffer (wash buffer + with 500 mM NaCl) and  
953 finally two washes in TE buffer. At the end of the washes, the solution was transferred  
954 to a fresh tube and TE buffer removed from the beads. Elution of chromatin from the  
955 beads and protein digest with proteinase K were combined into one step. To this end,  
956 150  $\mu$ l complete elution buffer (20 mM Tris-HCl, pH 7.5, 50 mM NaCl, 5 mM EDTA, 1%  
957 SDS and 100  $\mu$ g/ml proteinase K (Sigma)) was added and the beads incubated for 4  
958 h at 68 °C with shaking at 1300 rpm. The supernatant was removed from the tube and  
959 150  $\mu$ l elution buffer (complete elution buffer without SDS and Proteinase K) added.  
960 After a further 5 min incubation at 68 °C, the two supernatants were combined. Input  
961 samples were processed in parallel with the ChIP samples. DNA was purified from  
962 each supernatant using the QIAEX II Gel extraction kit (Qiagen) following the  
963 manufacturer's protocol for concentrating DNA from solutions. DNA was eluted in 40  
964  $\mu$ l buffer EB and stored at -20 °C until required.



965 Precipitated DNA for each experimental condition and antibody was quantified by  
966 qPCR using SYBR-GreenER in 12.5 µl reactions performed in triplicate (Invitrogen).  
967 Primers were designed to amplify the promoter sequences of c-Fos and c-Jun and the  
968 sequences of the primers used are given in appendix A. Primer binding sites were  
969 selected that encompassed predicted transcription factor binding sites. qPCR was  
970 performed using a CFX96 (BIO-RAD) or Roche Light Cycler480 real-time PCR  
971 instrument and cycling parameters were taken from the manufacturer's instructions for  
972 SYBR-GreenER (Thermo Life Technologies).

973 The Ct values from triplicate technical replicates (n=3) from each sample were  
974 averaged to generate SampleCT and InputCt values. The values were analysed by  
975 expressing enrichment of the immunoprecipitated DNA for each antibody as a  
976 percentage of the input sample for the relevant experimental condition. ChIPs were  
977 repeated on at least 3 independent experimental samples.

978

### 979 **Jugular vein infusion of endothelin-1/isoproterenol in Wistar rat**

980 Experimental protocols were approved by the local ethical committee (Ethische  
981 Commissie, Dierproeven, KU Leuven), under license number P055/2017. 250-300 g  
982 Wistar (RccHan:WIST) male rats were obtained from Harlan (NL). Anesthesia was  
983 induced using ketamine and xylazine in combination (100 mg/kg ketamine, 10 mg/kg  
984 xylazine) by IP. Body temperature was maintained throughout the procedure with a  
985 heated mat (Sanitas).

986 A small area of chest was shaved with depilatory cream (Veet) and limbs secured with  
987 tape. A small incision was made just above and to the right hand side of the sternum  
988 and the skin stretched thin with a hemostat to make the jugular vein visible. A 30 gauge

989 needle attached to a cannula (2F x 30 cm, green, Portex) was inserted into the jugular  
990 vein, just before it branches and the vein disappears under the pectoral muscle.

991 The cannula was attached to a 5 ml syringe and a dispensing pump (Harvard  
992 Apparatus) dispensing the required volume (300-500  $\mu$ l) over a 15-min period. A slow  
993 steady release of the dosage in this manner was required to reduce the acute  
994 vasoconstrictive effect of a single rapid injection of the same dosage.

995 Endothelin-1 (Millipore) was administered at a final dosage of 1000 ng/kg and  
996 isoproterenol hydrochloride (Sigma Aldrich) at 50  $\mu$ g/kg. Final working concentrations  
997 prepared in sterile saline and vehicle-only controls (Ctrl) were administered the same  
998 volume of sterile saline over a 15 min period. On withdrawal of the needle, medical  
999 gauze was placed over the wound and pressure applied until bleeding stopped. The  
1000 wound was cleaned with iodine solution and for the 24 h time point, the skin was  
1001 sutured together with interrupted stiches.

1002

1003 For the 15 min time point, rats were sacrificed by cervical dislocation and heart  
1004 removed for dissection immediately. For the 24 h time point, rats were allowed to  
1005 recover alone in a cage on heated mat, with easy access to food and water. The  
1006 humane 24 h end-point was performed by anesthesia induction in an isoflurane  
1007 chamber followed by cervical dislocation and immediate removal of the heart.

1008 Whole hearts were removed and placed in ice cold PBS briefly to remove excess blood,  
1009 dissected using a sterile surgical scalpel in PBS on ice and weighed on a microbalance  
1010 before snap-freezing in liquid nitrogen and stored at -80 °C.

1011

1012 **Adenoviral methods**

1013 Adenoviruses were produced and amplified in HEK293 cells and purified as previously  
1014 described (Archer et al., 2017). Adenoviruses to express the WT and catalytically dead  
1015 D565A mutant (DN) of MSK1 were generated using the AdEasy method by sub-cloning  
1016 the cDNA for MSK1 or its mutant from a pCMV5 backbone (kindly provided by Prof D  
1017 Alessi, University of Dundee) into pShuttle CMV (Alessi, 1997). PacI digested  
1018 recombinant plasmids were transfected into HEK293 cells and crude adenovirus  
1019 harvested after 10-14 days. Adenoviruses for dominant negative (DN)-Jun and AP-1  
1020 luciferase were purchased from Vector Biolabs. All viruses were amplified in HEK293  
1021 cells, purified using the Vivapure Adenopack 100 (Sartorius) and titrated by end-point  
1022 dilution in HEK293 cells.

1023

1024 **Analysis of luciferase reporter activity**

1025 The AP-1 luciferase reporter was expressed using an adenoviral vector and luciferase  
1026 activity determined using a luciferase assay kit from Promega as previously described  
1027 (Higazi et al., 2009). Briefly, cultures of NRVM in 48 well plates were infected in  
1028 duplicate and agonist treatments applied for 24 h. After removal of medium, cells were  
1029 lysed in 150 µl 1X cell culture lysis buffer (Promega). Luciferase activity present in 10  
1030 µl of lysate clarified by centrifugation was then quantitated in white 96-well luminometer  
1031 plate (Microumat Plus 1b 96V instrument, Berthold Technologies) using 50 µl of  
1032 luciferase assay reagent (Promega).

1033

1034 **Small interfering RNA (siRNA) knockdown**

1035 Stealth™ siRNAs were purchased from Invitrogen. To achieve sufficient knockdown of  
1036 *Msk1* or *Brg1*, two siRNAs targeting different regions of the target mRNA were  
1037 selected. Medium GC-content non-silencing siRNA (Invitrogen) was transfected as a  
1038 negative control. Transfections were performed at the onset of the serum starvation  
1039 period using Dharmafect I and Accell medium (Dharmacon). To transfect NRVM  
1040 cultured in 12-well dishes, 200 pmol siRNA duplexes were made up to 100 µl total  
1041 volume in Accell media and the solution mixed by pipetting. In a separate tube, 6 µl  
1042 Dharmafect I was added to 94 µl Accell medium and mixed. After incubation for 5 min  
1043 at room temperature, the tubes were combined, mixed and incubated for a further 20  
1044 min at room temperature. During this incubation, NRVM culture medium was replaced  
1045 with 800 µl pre-warmed Accell medium. At the end of the 20 min incubation,  
1046 transfection complexes were added to the cultures in a drop-wise manner and  
1047 incubated with the cells for 6 h. Post-transfection, Accell medium was replaced with  
1048 fresh maintenance medium and the remainder of the serum starvation period carried  
1049 out.

1050

### 1051 **Statistical analysis**

1052 Data were collated in Microsoft Excel and statistical analysis performed using  
1053 GraphPad Prism v7.0 or v8.0. Data is presented as the mean of at least three  
1054 independent experiments  $\pm$  the standard error of the mean (SEM). The number of  
1055 independent experiments for each figure is indicated in the figure legend. For  
1056 comparison between two groups, p-values were calculated using the unpaired two-  
1057 tailed t-test. To calculate p-values for data comparing three or more groups, one-way  
1058 ANOVA with Bonferroni's multiple comparison test for p value correction. P-values less

1059 than 0.05 were taken as significant. Individual (adjusted) p values are indicated on the  
1060 figures.

1061

## 1062 **References**

- 1063 Alessi, D.R. (1997). The protein kinase C inhibitors Ro 318220 and GF 109203X are equally potent  
1064 inhibitors of MAPKAP kinase-1beta (Rsk-2) and p70 S6 kinase. *FEBS Lett.* *402*, 121–123.
- 1065 Alkass, K., Panula, J., Westman, M., Wu, T.-D., Guerquin-Kern, J.-L., and Bergmann, O. (2015). No  
1066 Evidence for Cardiomyocyte Number Expansion in Preadolescent Mice. *Cell* *163*, 1026–1036.
- 1067 Archer, C.R., Robinson, E.L., Drawnel, F.M., and Roderick, H.L. (2017). Endothelin-1 promotes  
1068 hypertrophic remodelling of cardiac myocytes by activating sustained signalling and transcription  
1069 downstream of endothelin type A receptors. *Cell. Signal.* *36*, 240–254.
- 1070 Arthur, J.S., and Cohen, P. (2000). MSK1 is required for CREB phosphorylation in response to  
1071 mitogens in mouse embryonic stem cells. *FEBS Lett.* *482*, 44–48.
- 1072 Awad, S., Kunhi, M., Little, G.H., Bai, Y., An, W., Bers, D., Kedes, L., and Poizat, C. (2013). Nuclear  
1073 CaMKII enhances histone H3 phosphorylation and remodels chromatin during cardiac hypertrophy.  
1074 *Nucleic Acids Res.* *41*, 7656–7672.
- 1075 Awad, S., Al-Haffar, K.M.A., Marashly, Q., Quijada, P., Kunhi, M., Al-Yacoub, N., Wade, F.S.,  
1076 Mohammed, S.F., Al-Dayel, F., Sutherland, G., et al. (2015). Control of histone H3 phosphorylation by  
1077 CaMKII $\delta$  in response to haemodynamic cardiac stress. *J. Pathol.* *235*, 606–618.
- 1078 Backs, J., Song, K., Bezprozvannaya, S., Chang, S., and Olson, E.N. (2006). CaM kinase II selectively  
1079 signals to histone deacetylase 4 during cardiomyocyte hypertrophy. *J Clin Invest* *116*, 1853–1864.
- 1080 Bain, J., Plater, L., Elliott, M., Shpiro, N., Hastie, C.J., Mclauchlan, H., Klevernic, I., Arthur, J.S.C., Alessi,  
1081 D.R., and Cohen, P. (2007). The selectivity of protein kinase inhibitors: a further update. *Biochem J*  
1082 *408*, 297–315.
- 1083 Balmanno, K., and Cook, S.J. (1999). Sustained MAP kinase activation is required for the expression of  
1084 cyclin D1, p21Cip1 and a subset of AP-1 proteins in CCL39 cells. *Oncogene* *18*, 3085–3097.
- 1085 Bergmann, O., and Jovinge, S. (2012). Isolation of Cardiomyocyte Nuclei from Post-mortem Tissue. *J*  
1086 *Vis Exp*.
- 1087 Beyer, M.E., Nerz, S., Krämer, B.K., and Hoffmeister, H.M. (1994). Hemodynamic and inotropic effects  
1088 of endothelin-1 in vivo. *Basic Res. Cardiol.* *89*, 39–49.
- 1089 Boluyt, M.O., Long, X., Eschenhagen, T., Mende, U., Schmitz, W., Crow, M.T., and Lakatta, E.G. (1995).  
1090 Isoproterenol infusion induces alterations in expression of hypertrophy-associated genes in rat heart.  
1091 *Am. J. Physiol.* *269*, H638-647.

- 1092 Bueno, O.F., De Windt, L.J., Tymitz, K.M., Witt, S.A., Kimball, T.R., Klevitsky, R., Hewett, T.E., Jones,  
1093 S.P., Lefer, D.J., Peng, C.-F., et al. (2000). The MEK1–ERK1/2 signaling pathway promotes  
1094 compensated cardiac hypertrophy in transgenic mice. *EMBO J* *19*, 6341–6350.
- 1095 Chen, L., Glover, J.N., Hogan, P.G., Rao, A., and Harrison, S.C. (1998). Structure of the DNA-binding  
1096 domains from NFAT, Fos and Jun bound specifically to DNA. *Nature* *392*, 42–48.
- 1097 Chiu, R., Boyle, W.J., Meek, J., Smeal, T., Hunter, T., and Karin, M. (1988). The c-Fos protein interacts  
1098 with c-Jun/AP-1 to stimulate transcription of AP-1 responsive genes. *Cell* *54*, 541–552.
- 1099 Clayton, A.L., and Mahadevan, L.C. (2003). MAP kinase-mediated phosphoacetylation of histone H3  
1100 and inducible gene regulation. *FEBS Lett.* *546*, 51–58.
- 1101 Clayton, A.L., Rose, S., Barratt, M.J., and Mahadevan, L.C. (2000). Phosphoacetylation of histone H3  
1102 on c-fos- and c-jun-associated nucleosomes upon gene activation. *EMBO J* *19*, 3714–3726.
- 1103 Deak, M., Clifton, A.D., Lucocq, J.M., and Alessi, D.R. (1998a). Mitogen- and stress-activated protein  
1104 kinase-1 (MSK1) is directly activated by MAPK and SAPK2/p38, and may mediate activation of CREB.  
1105 *The EMBO Journal* *17*, 4426–4441.
- 1106 Deak, M., Clifton, A.D., Lucocq, L.M., and Alessi, D.R. (1998b). Mitogen- and stress-activated protein  
1107 kinase-1 (MSK1) is directly activated by MAPK and SAPK2/p38, and may mediate activation of CREB.  
1108 *EMBO J.* *17*, 4426–4441.
- 1109 Drawnel, F.M., Wachten, D., Molkenin, J.D., Maillet, M., Aronsen, J.M., Swift, F., Sjaastad, I., Liu, N.,  
1110 Catalucci, D., Mikoshiba, K., et al. (2012). Mutual antagonism between IP3RII and miRNA-133a  
1111 regulates calcium signals and cardiac hypertrophy. *J Cell Biol* *199*, 783–798.
- 1112 Drawnel, F.M., Archer, C.R., and Roderick, H.L. (2013). The role of the paracrine/autocrine mediator  
1113 endothelin-1 in regulation of cardiac contractility and growth. *Br. J. Pharmacol.* *168*, 296–317.
- 1114 Dries, E., Santiago, D.J., Gilbert, G., Lenaerts, I., Vandenberk, B., Nagaraju, C.K., Johnson, D.M.,  
1115 Holemans, P., Roderick, H.L., Macquaide, N., et al. (2018). Hyperactive ryanodine receptors in human  
1116 heart failure and ischaemic cardiomyopathy reside outside of couplons. *Cardiovasc. Res.* *114*, 1512–  
1117 1524.
- 1118 Duncan, E.A., Anest, V., Cogswell, P., and Baldwin, A.S. (2006). The kinases MSK1 and MSK2 are  
1119 required for epidermal growth factor-induced, but not tumor necrosis factor-induced, histone H3  
1120 Ser10 phosphorylation. *J. Biol. Chem.* *281*, 12521–12525.
- 1121 Dyson, M.H., Thomson, S., Inagaki, M., Goto, H., Arthur, S.J., Nightingale, K., Iborra, F.J., and  
1122 Mahadevan, L.C. (2005). MAP kinase-mediated phosphorylation of distinct pools of histone H3 at S10  
1123 or S28 via mitogen- and stress-activated kinase 1/2. *Journal of Cell Science* *118*, 2247–2259.
- 1124 Eferl, R., and Wagner, E.F. (2003). AP-1: a double-edged sword in tumorigenesis. *Nat. Rev. Cancer* *3*,  
1125 859–868.
- 1126 Garrington, T.P., and Johnson, G.L. (1999). Organization and regulation of mitogen-activated protein  
1127 kinase signaling pathways. *Curr. Opin. Cell Biol.* *11*, 211–218.
- 1128 Gehani, S.S., Agrawal-Singh, S., Dietrich, N., Christophersen, N.S., Helin, K., and Hansen, K. (2010).  
1129 Polycomb group protein displacement and gene activation through MSK-dependent H3K27me3S28  
1130 phosphorylation. *Mol. Cell* *39*, 886–900.

- 1131 Gille, H., Sharrocks, A.D., and Shaw, P.E. (1992). Phosphorylation of transcription factor p62 TCF by  
1132 MAP kinase stimulates ternary complex formation at c- fos promoter. *Nature* 358, 414–417.
- 1133 Gilsbach, R., Preissl, S., Grüning, B.A., Schnick, T., Burger, L., Benes, V., Würch, A., Bönisch, U.,  
1134 Günther, S., Backofen, R., et al. (2014). Dynamic DNA methylation orchestrates cardiomyocyte  
1135 development, maturation and disease. *Nature Communications* 5, 1–13.
- 1136 Glover, J.N., and Harrison, S.C. (1995). Crystal structure of the heterodimeric bZIP transcription factor  
1137 c-Fos-c-Jun bound to DNA. *Nature* 373, 257–261.
- 1138 Hang, C.T., Yang, J., Han, P., Cheng, H.-L., Shang, C., Ashley, E., Zhou, B., and Chang, C.-P. (2010).  
1139 Chromatin regulation by Brg1 underlies heart muscle development and disease. *Nature* 466, 62–67.
- 1140 Heineke, J., and Molkentin, J.D. (2006). Regulation of cardiac hypertrophy by intracellular signalling  
1141 pathways. *Nature Reviews Molecular Cell Biology* 7, 589–600.
- 1142 Hess, J., Angel, P., and Schorpp-Kistner, M. (2004). AP-1 subunits: quarrel and harmony among  
1143 siblings. *J. Cell. Sci.* 117, 5965–5973.
- 1144 Higazi, D.R., Fearnley, C.J., Drawnel, F.M., Talasila, A., Corps, E.M., Ritter, O., McDonald, F.,  
1145 Mikoshiba, K., Bootman, M.D., and Roderick, H.L. (2009). Endothelin-1-stimulated InsP3-induced  
1146 Ca<sup>2+</sup> release is a nexus for hypertrophic signaling in cardiac myocytes. *Mol. Cell* 33, 472–482.
- 1147 Hilfiker-Kleiner, D., Hilfiker, A., Castellazzi, M., Wollert, K.C., Trautwein, C., Schunkert, H., and Drexler,  
1148 H. (2006). JunD attenuates phenylephrine-mediated cardiomyocyte hypertrophy by negatively  
1149 regulating AP-1 transcriptional activity. *Cardiovasc Res* 71, 108–117.
- 1150 Iwaki, K., Sukhatme, V.P., Shubeita, H.E., and Chien, K.R. (1990). Alpha- and beta-adrenergic  
1151 stimulation induces distinct patterns of immediate early gene expression in neonatal rat myocardial  
1152 cells. fos/jun expression is associated with sarcomere assembly; Egr-1 induction is primarily an alpha  
1153 1-mediated response. *J. Biol. Chem.* 265, 13809–13817.
- 1154 Izumo, S., Nadal-Ginard, B., and Mahdavi, V. (1988). Protooncogene induction and reprogramming of  
1155 cardiac gene expression produced by pressure overload. *Proc. Natl. Acad. Sci. U.S.A.* 85, 339–343.
- 1156 Johannessen, M., Delghandi, M.P., and Moens, U. (2004). What turns CREB on? *Cell. Signal.* 16, 1211–  
1157 1227.
- 1158 Kaiser, R.A., Bueno, O.F., Lips, D.J., Doevendans, P.A., Jones, F., Kimball, T.F., and Molkentin, J.D.  
1159 (2004). Targeted inhibition of p38 mitogen-activated protein kinase antagonizes cardiac injury and  
1160 cell death following ischemia-reperfusion in vivo. *J. Biol. Chem.* 279, 15524–15530.
- 1161 Karin, M., Liu, Z., and Zandi, E. (1997). AP-1 function and regulation. *Current Opinion in Cell Biology* 9,  
1162 240–246.
- 1163 Kasper, L.H., Thomas, M.C., Zambetti, G.P., and Brindle, P.K. (2011). Double null cells reveal that CBP  
1164 and p300 are dispensable for p53 targets p21 and Mdm2 but variably required for target genes of  
1165 other signaling pathways. *Cell Cycle* 10, 212–221.
- 1166 Kehat, I., Davis, J., Tiburcy, M., Accornero, F., Saba-El-Leil, M.K., Maillet, M., York, A.J., Lorenz, J.N.,  
1167 Zimmermann, W.H., Meloche, S., et al. (2011). Extracellular signal-regulated kinases 1 and 2 regulate  
1168 the balance between eccentric and concentric cardiac growth. *Circ. Res.* 108, 176–183.

- 1169 Kim, J.-Y., Kim, K.-B., Son, H.-J., Chae, Y.-C., Oh, S.-T., Kim, D.-W., Pak, J.H., and Seo, S.-B. (2012).  
1170 H3K27 methylation and H3S28 phosphorylation-dependent transcriptional regulation by INHAT  
1171 subunit SET/TAF-I $\beta$ . *FEBS Letters* 586, 3159–3165.
- 1172 Kim-Mitsuyama, S., Izumi, Y., Izumiya, Y., Namba, M., Yoshida, K., Wake, R., Yoshiyama, M., and Iwao,  
1173 H. (2006). Dominant-negative c-Jun inhibits rat cardiac hypertrophy induced by angiotensin II and  
1174 hypertension. *Gene Therapy* 13, 348–355.
- 1175 Liu, R., van Berlo, J.H., York, A.J., Maillet, M., Vagnozzi, R.J., and Molkentin, J.D. (2016). DUSP8  
1176 Regulates Cardiac Ventricular Remodeling by Altering ERK1/2 Signaling. *Circ Res* 119, 249–260.
- 1177 Liu, W., Zi, M., Jin, J., Prehar, S., Oceandy, D., Kimura, T.E., Lei, M., Neyses, L., Weston, A.H.,  
1178 Cartwright, E.J., et al. (2009). Cardiac-specific deletion of mkk4 reveals its role in pathological  
1179 hypertrophic remodeling but not in physiological cardiac growth. *Circ. Res.* 104, 905–914.
- 1180 Livak, K.J., and Schmittgen, T.D. (2001). Analysis of relative gene expression data using real-time  
1181 quantitative PCR and the 2<sup>-Delta Delta C(T)</sup> Method. *Methods* 25, 402–408.
- 1182 Malakhova, M., Kurinov, I., Liu, K., Zheng, D., D’Angelo, I., Shim, J.-H., Steinman, V., Bode, A.M., and  
1183 Dong, Z. (2009). Structural Diversity of the Active N-Terminal Kinase Domain of p90 Ribosomal S6  
1184 Kinase 2. *PLOS ONE* 4, e8044.
- 1185 Marber, M.S., Rose, B., and Wang, Y. (2011). The p38 mitogen-activated protein kinase pathway--a  
1186 potential target for intervention in infarction, hypertrophy, and heart failure. *J. Mol. Cell. Cardiol.* 51,  
1187 485–490.
- 1188 Markou, T., and Lazou, A. (2002). Phosphorylation and activation of mitogen- and stress-activated  
1189 protein kinase-1 in adult rat cardiac myocytes by G-protein-coupled receptor agonists requires both  
1190 extracellular-signal-regulated kinase and p38 mitogen-activated protein kinase. *Biochem. J.* 365, 757–  
1191 763.
- 1192 Markou, T., Hadzopoulou-Cladaras, M., and Lazou, A. (2004). Phenylephrine induces activation of  
1193 CREB in adult rat cardiac myocytes through MSK1 and PKA signaling pathways. *J. Mol. Cell. Cardiol.*  
1194 37, 1001–1011.
- 1195 Markou, T., Cieslak, D., Gaitanaki, C., and Lazou, A. (2009). Differential roles of MAPKs and MSK1  
1196 signalling pathways in the regulation of c-Jun during phenylephrine-induced cardiac myocyte  
1197 hypertrophy. *Mol. Cell. Biochem.* 322, 103–112.
- 1198 McCoy, C.E., Campbell, D.G., Deak, M., Bloomberg, G.B., and Arthur, J.S.C. (2005). MSK1 activity is  
1199 controlled by multiple phosphorylation sites. *Biochem. J.* 387, 507–517.
- 1200 Mutlak, M., and Kehat, I. (2015). Extracellular signal-regulated kinases 1/2 as regulators of cardiac  
1201 hypertrophy. *Front Pharmacol* 6.
- 1202 Naqvi, S., Macdonald, A., McCoy, C.E., Darragh, J., Reith, A.D., and Arthur, J.S.C. (2012).  
1203 Characterization of the cellular action of the MSK inhibitor SB-747651A. *Biochem J* 441, 347–357.
- 1204 Petrich, B.G., Molkentin, J.D., and Wang, Y. (2003). Temporal activation of c-Jun N-terminal kinase in  
1205 adult transgenic heart via cre-loxP-mediated DNA recombination. *FASEB J.* 17, 749–751.
- 1206 Phair, R.D., and Misteli, T. (2000). High mobility of proteins in the mammalian cell nucleus. *Nature*  
1207 404, 604–609.



- 1208 Purcell, N.H., Wilkins, B.J., York, A., Saba-El-Leil, M.K., Meloche, S., Robbins, J., and Molkenin, J.D.  
1209 (2007). Genetic inhibition of cardiac ERK1/2 promotes stress-induced apoptosis and heart failure but  
1210 has no effect on hypertrophy in vivo. *Proc. Natl. Acad. Sci. U.S.A.* *104*, 14074–14079.
- 1211 ROSE, B.A., FORCE, T., and WANG, Y. (2010). Mitogen-Activated Protein Kinase Signaling in the Heart:  
1212 Angels Versus Demons in a Heart-Breaking Tale. *Physiol Rev* *90*.
- 1213 Roux, P.P., and Blenis, J. (2004). ERK and p38 MAPK-activated protein kinases: a family of protein  
1214 kinases with diverse biological functions. *Microbiol. Mol. Biol. Rev.* *68*, 320–344.
- 1215 Saadatmand, A.R., Sramek, V., Weber, S., Finke, D., Dewenter, M., Sticht, C., Gretz, N., Wüstemann,  
1216 T., Hagenmueller, M., Kuenzel, S.R., et al. (2019). CaM kinase II regulates cardiac hemoglobin  
1217 expression through histone phosphorylation upon sympathetic activation. *PNAS* *116*, 22282–22287.
- 1218 Sanna, B., Bueno, O.F., Dai, Y.-S., Wilkins, B.J., and Molkenin, J.D. (2005). Direct and Indirect  
1219 Interactions between Calcineurin-NFAT and MEK1-Extracellular Signal-Regulated Kinase 1/2 Signaling  
1220 Pathways Regulate Cardiac Gene Expression and Cellular Growth. *Mol Cell Biol* *25*, 865–878.
- 1221 Savarese, G., and Lund, L.H. (2017). Global Public Health Burden of Heart Failure. *Card Fail Rev* *3*, 7–  
1222 11.
- 1223 Selvetella, G., Hirsch, E., Notte, A., Tarone, G., and Lembo, G. (2004). Adaptive and maladaptive  
1224 hypertrophic pathways: points of convergence and divergence. *Cardiovasc Res* *63*, 373–380.
- 1225 Soloaga, A., Thomson, S., Wiggin, G.R., Rampersaud, N., Dyson, M.H., Hazzalin, C.A., Mahadevan, L.C.,  
1226 and Arthur, J.S.C. (2003a). MSK2 and MSK1 mediate the mitogen- and stress-induced  
1227 phosphorylation of histone H3 and HMG-14. *EMBO J* *22*, 2788–2797.
- 1228 Song, H.K., Hong, S.-E., Kim, T., and Kim, D.H. (2012). Deep RNA Sequencing Reveals Novel Cardiac  
1229 Transcriptomic Signatures for Physiological and Pathological Hypertrophy. *PLoS One* *7*.
- 1230 Tachibana, H., Perrino, C., Takaoka, H., Davis, R.J., Naga Prasad, S.V., and Rockman, H.A. (2006). JNK1  
1231 is required to preserve cardiac function in the early response to pressure overload. *Biochem.*  
1232 *Biophys. Res. Commun.* *343*, 1060–1066.
- 1233 Takeuchi, K., Yoshikawa, J., Omura, T., Yoshiyama, M., Yoshida, K., Nakamura, Y., Kim, S., Omura, T.,  
1234 Yoshiyama, M., Yoshida, K., et al. Dominant Negative Mutant of c-Jun Inhibits Cardiomyocyte  
1235 Hypertrophy Induced by Endothelin 1 and Phenylephrine.
- 1236 Thienpont, B., Aronsen, J.M., Robinson, E.L., Okkenhaug, H., Loche, E., Ferrini, A., Brien, P., Alkass, K.,  
1237 Tomasso, A., Agrawal, A., et al. (2017). The H3K9 dimethyltransferases EHMT1/2 protect against  
1238 pathological cardiac hypertrophy. *J Clin Invest* *127*, 335–348.
- 1239 Torgerson, T.R., Colosia, A.D., Donahue, J.P., Lin, Y.Z., and Hawiger, J. (1998). Regulation of NF-kappa  
1240 B, AP-1, NFAT, and STAT1 nuclear import in T lymphocytes by noninvasive delivery of peptide  
1241 carrying the nuclear localization sequence of NF-kappa B p50. *J. Immunol.* *161*, 6084–6092.
- 1242 Ulm, S., Liu, W., Zi, M., Tsui, H., Chowdhury, S.K., Endo, S., Satoh, Y., Prehar, S., Wang, R., Cartwright,  
1243 E.J., et al. (2014). Targeted deletion of ERK2 in cardiomyocytes attenuates hypertrophic response but  
1244 provokes pathological stress induced cardiac dysfunction. *Journal of Molecular and Cellular*  
1245 *Cardiology* *72*, 104–116.

- 1246 Vandesompele, J., De Preter, K., Pattyn, F., Poppe, B., Van Roy, N., De Paepe, A., and Speleman, F.  
1247 (2002). Accurate normalization of real-time quantitative RT-PCR data by geometric averaging of  
1248 multiple internal control genes. *Genome Biology* 3, research0034.1.
- 1249 Wang, J., Gareri, C., and Rockman, H.A. (2018). G-Protein-Coupled Receptors in Heart Disease. *Circ.*  
1250 *Res.* 123, 716–735.
- 1251 Watson, P.A., Birdsey, N., Huggins, G.S., Svensson, E., Heppe, D., and Knaub, L. (2010). Cardiac-  
1252 specific overexpression of dominant-negative CREB leads to increased mortality and mitochondrial  
1253 dysfunction in female mice. *Am. J. Physiol. Heart Circ. Physiol.* 299, H2056-2068.
- 1254 Wiggin, G.R., Soloaga, A., Foster, J.M., Murray-Tait, V., Cohen, P., and Arthur, J.S.C. (2002a). MSK1  
1255 and MSK2 are required for the mitogen- and stress-induced phosphorylation of CREB and ATF1 in  
1256 fibroblasts. *Mol. Cell. Biol.* 22, 2871–2881.
- 1257 Wiggin, G.R., Soloaga, A., Foster, J.M., Murray-Tait, V., Cohen, P., and Arthur, J.S.C. (2002b). MSK1  
1258 and MSK2 Are Required for the Mitogen- and Stress-Induced Phosphorylation of CREB and ATF1 in  
1259 Fibroblasts. *Mol Cell Biol* 22, 2871–2881.
- 1260 Windak, R., Müller, J., Felley, A., Akhmedov, A., Wagner, E.F., Pedrazzini, T., Sumara, G., and Ricci, R.  
1261 (2013). The AP-1 Transcription Factor c-Jun Prevents Stress-Imposed Maladaptive Remodeling of the  
1262 Heart. *PLoS One* 8.
- 1263 Wu Guangyu, Yussman Martin G., Barrett Thomas J., Hahn Harvey S., Osinska Hanna, Hilliard George  
1264 M., Wang Xuejun, Toyokawa Tsuyoshi, Yatani Atsuko, Lynch Roy A., et al. (2001). Increased  
1265 Myocardial Rab GTPase Expression. *Circulation Research* 89, 1130–1137.
- 1266 Yang, C.-M., Luo, S.-F., Hsieh, H.-L., Chi, P.-L., Lin, C.-C., Wu, C.-C., and Hsiao, L.-D. (2010). Interleukin-  
1267 1beta induces ICAM-1 expression enhancing leukocyte adhesion in human rheumatoid arthritis  
1268 synovial fibroblasts: involvement of ERK, JNK, AP-1, and NF-kappaB. *J. Cell. Physiol.* 224, 516–526.
- 1269 Yokota, T., and Wang, Y. (2016). p38 MAP kinases in the heart. *Gene* 575, 369–376.
- 1270 Zhong, S., Jansen, C., She, Q.-B., Goto, H., Inagaki, M., Bode, A.M., Ma, W.-Y., and Dong, Z. (2001).  
1271 Ultraviolet B-induced Phosphorylation of Histone H3 at Serine 28 Is Mediated by MSK1. *J. Biol. Chem.*  
1272 276, 33213–33219.

1273

## 1274 **Acknowledgments**

1275 We would like to thank Dario Alessi (FRS FRSE FMedSci, University of Dundee) for  
1276 providing the pCMV5 backbone vector for sub-cloning of MSK1 and Peter Pokreisz  
1277 (CoBioRes NV and KU Leuven) for assistance in establishing techniques for jugular  
1278 vein infusion of rats.

1279

1280 **Funding**

1281 This work was supported by an Odysseus Award and project grants from the Research  
1282 Foundation Flanders (Fonds Wetenschappelijk Onderzoek; FWO, 90663 and  
1283 G0C6419N), the Babraham Institute, the Biotechnology and Biological Sciences  
1284 Research Council (BBSRC, BBS/E/B/0000C116, BBS/E/B/000C0402) and The Royal  
1285 Society (University Research Fellowship to H.L.R., UF041311). F.M.D. and C.R.A.  
1286 were supported by studentships from the BBSRC (BBS/E/B/0000L715 and  
1287 BBS/E/B/0000L726 respectively). E.L.R. was funded through a Wellcome Trust PhD  
1288 fellowship (Cardiovascular & Disease) and an International scholarship from the KU  
1289 Leuven Faculty of Medicine. SM received a Research Grant from the FWO  
1290 (1524317N).

1291

1292 **Author contributions:**

1293 Conceptualisation Ideas; E.L.R., F.D., S.M., H.L.R.

1294 Data curation and Formal analysis; E.L.R., F.D., S.M., C.R.A., W.L., H.O., K.A., J.M.A.,  
1295 C.K.N., S.C.A., H.L.R.

1296 Investigation; E.L.R., F.D., S.M., C.A., H.O., K.A., J.M.A., C.K.N., W.L., H.L.R.

1297 Writing - Original Draft Preparation; E.L.R., F.D., H.L.R.

1298 Writing - Review & Editing; all authors

1299 Resource provision; O.B., K.A., J.M.A., I.S., K.R.S.

1300 Supervision Oversight and Leadership; S.C.A., I.S., K.R.S., O.B., H.L.R.

1301 **Competing interests**

1302 No conflict of interest to declare.

1303

1304 **Figure Legends**

1305 **Figure 1: Pharmacological and molecular suppression of ERK signalling**  
1306 **attenuates IEG induction and hypertrophy in vitro**

1307 **A.** RT-qPCR gene expression analysis for *Nppa/Anf* mRNA in NRVMs +/- 30 min pre-  
1308 treatment with PD184352 (PD) +/- 15 min ET-1. N=5 biological replicates (defined as  
1309 5 different NRVM preparations from different litters), n=3 technical replicates (repeated  
1310 reactions from the same sample). **B.** Cell area ( $\mu\text{m}^2$ ) as a measure of cardiomyocyte  
1311 hypertrophy in NRVMs +/- PD +/- ET-1. N=4, pseudoreplicates ( $\underline{n}$ ) (defined as repeated  
1312 measures of different cells or regions of interest from the same sample) =80-125. **C.**  
1313 Immunostaining for Anf (red), sarcomeric alpha-actinin ( $\alpha$ -Act) (green) and nuclear  
1314 stained with DAPI (blue) in NRVMs +/- PD +/- ET-1. Quantification (left) represents  
1315 individual mean data points for N=4, representative images (right). The scale bar  
1316 represents 25  $\mu\text{m}$ . **D.** RT-qPCR analysis of immediate early genes (IEGs) *c-Jun* and  
1317 *c-Fos* mRNA expression in NRVMs +/- PD +/- ET-1. For *c-Jun* (Left), N=4, n=3. For *c-*  
1318 *Fos* (Right), N=3, n=3. **E.** AP-1 luciferase assay as a readout of AP-1 transcriptional  
1319 activity in NRVMs +/- PD +/- ET-1 relative to untreated. For C and C ET-1, N=8, n=3.  
1320 For PD and PD ET-1, N=3, n=3. **F.** Cell area ( $\mu\text{m}^2$ ) measurements for NRVMs infected  
1321 with either control or DN-Jun (dominant negative, kinase dead) adenoviral vectors +/-  
1322 ET-1. Individual data points are represented by N=4,  $\underline{n}$ =80-100. **G.** RT-qPCR analysis  
1323 of *Nppa/Anf* mRNA expression in NRVMs +/- DN-Jun +/- ET-1, N=4, n=3.

1324

1325 **Figure Supplement 1: IEG induction is activated by acute hypertrophic**  
1326 **stimulation and attenuated by suppression of ERK signalling in vitro**

1327 **A.** RT-qPCR analysis of *Nppb/Btnp* mRNA expression in NRVMs 24 h after ET-1  
1328 exposure. N=4, n=3. **B.** RT-qPCR gene expression analysis of *JunD*, *FosL* and *FosB*  
1329 mRNA in NRVMs +/- ET-1 treatment for 15 min. N=4, n=3. **C.** Schematic diagram of  
1330 the kinase signalling cascade induced by ET-1 stimulation resulting in ERK1/2  
1331 activation. Pharmacological inhibition of MEK1 by PD184352 (PD) is indicated. **D.**  
1332 Immunoblot analysis for phosphorylated ERK in NRVMs +/- PD +/- ET-1. Left:  
1333 Representative immunoblot for phosphorylated ERK (pERK), normalised to total ERK  
1334 (T-ERK) and sarcomeric  $\alpha$ -Act. Right: Quantitation of relative p-ERK normalised to T-  
1335 ERK and  $\alpha$ -Act. N=5.

1336

1337 **Figure 2: Neurohumoral signalling-induced ERK1/2 activation results in histone**  
1338 **H3S28 phosphorylation at IEG promoters**

1339 **A.** Immunoblot analysis of p $H3S10$  and p $H3S28$ . Left: Representative immunoblots  
1340 from 1 NRVM preparation probing for p $H3S10$  and p $H3S28$  in acid extracted histones  
1341 from NRVMs exposed to ET-1 for 0, 10 and 30 min in the presence or absence of PD.  
1342 Right: Levels of phosphorylated histone normalised to total H3 are shown. For p $H3S10$ ,  
1343 N=5. For p $H3S28$ , N=3. **B.** Confocal immunofluorescence analysis of p $H3S28$  in  
1344 cardiomyocytes in ventricular cardiac sections prepared from rats infused with ET-1 or  
1345 Iso for 15 min. Cardiomyocyte nuclei were demarcated by pericentriolar material 1  
1346 (Pcm-1; in green) perinuclear staining. Nuclei are stained with DAPI (blue) and p $H3S28$   
1347 in magenta. Scale bar = 25  $\mu$ m. The plot (left) shows quantification of nuclear p $H3S28$   
1348 in Pcm-1 positive nuclei. N=4,  $n=80-125$ . **C.** RT-qPCR gene expression analysis of

1349 IEGs *c-Jun* and *c-Fos* mRNA in left ventricular tissue from Wistar rats administered  
1350 with ET-1 or Iso through jugular vein infusion and sacrificed 15 min later. C, N=7, ET-  
1351 1, N=8, Iso, N=6, n=3. **D.** Chromatin immunoprecipitation-qPCR (ChIP-qPCR) analysis  
1352 of pH3S28 at IEG promoters, *c-Jun* and *c-Fos* in adult male Wistar rats that were  
1353 administered ET-1 or Iso through jugular vein infusion and sacrificed 15 min later. Top:  
1354 schematic for the site of ChIP primer amplification relative to the transcription start  
1355 sites. Below: quantification of enrichment compared with control (untreated) rats. N=3,  
1356 n=3.

1357

1358 **Figure Supplement 2: Histone H3S28 phosphorylation is associated with IEG**  
1359 **induction and cardiac hypertrophy**

1360 **A.** RT-qPCR analysis of immediate early genes *JunD*, *FosL1*, *FosB* and of *Smarca4*  
1361 (*Brg1*) mRNA in hearts from adult male Wistar rats that were administered ET-1 or Iso  
1362 through jugular vein administration and sacrificed 15 min later. C, N=7, ET-1, N=8 Iso,  
1363 N=6, n=3. **B.** RT-qPCR expression analysis for cardiac hypertrophy-associated foetal  
1364 genes *Nppa/Anf* and *Nppb/Bnp* mRNA in adult male Wistar rats that were administered  
1365 ET-1 or Iso through jugular vein administration and sacrificed 15 min later. C, N=6, ET-  
1366 1, N=6, Iso, N=7, n=3.

1367

1368 **Figure 3: Activated MSK is required for histone H3S28 phosphorylation,**  
1369 **recruitment of Brg1 to chromatin and IEG induction in cardiomyocytes**

1370 **A.** Immunoblot showing levels of phosphorylated (activated) MSK in NRVMs +/- PD +/-  
1371 ET-1, normalised to  $\alpha$ Act as a loading control. Left: Representative immunoblot. The  
1372  $\alpha$ -Actinin blot is the same as shown in Fig S1D and pMSK was probed on the same

1373 blot. Right: Quantification of pMSK relative to control vehicle treated cells. N=5. **B.**  
1374 Confocal immunofluorescence analysis of pMSK in cardiomyocytes in ventricular  
1375 cardiac sections prepared from rats infused with ET-1 or Iso for 15 min. Cardiomyocyte  
1376 nuclei were demarcated by pericentriolar material 1 (Pcm-1; in magenta) perinuclear  
1377 staining. Nuclei are stained with DAPI (blue) and pMSK in green. Left: Quantification  
1378 of nuclear pMSK in Pcm-1 positive nuclei. N=4,  $n=200-400$ . Right: Confocal images of  
1379 heart sections from animals treated as indicated. Scale bar = 20  $\mu\text{m}$ . **C.** Representative  
1380 confocal images of immunostained NRVMs showing expression of FLAG-tagged WT-  
1381 MSK and DN-MSK adenoviruses (AdV). Nuclei are stained with DAPI (blue), Beta-  
1382 Actin in green and FLAG-tagged MSK in red. **D.** Immunoblotting for pMSK, pERK and  
1383 FLAG-tagged MSK AdV in NRVMs infected with either empty vector (EV), WT-MSK1  
1384 AdV or DN-MSK1 AdV and treated +/- 15 min with ET-1, normalised to  $\alpha$ -Act as a  
1385 loading control. Left: Representative immunoblot. Right: Quantification of immunoblot,  
1386 relative to EV. N=5. **E.** Immunoblotting for phosphorylated histone H3S28 in NRVMs  
1387 infected with either empty vector (EV), WT-MSK1 AdV or DN-MSK1 AdV treated +/-  
1388 15 min with ET-1, normalised to total Histone 3 (T-H3) as a loading control. Left:  
1389 Representative immunoblot. Right: Quantification of immunoblot data. N=6. **F.** Effect  
1390 of DN-MSK expression on *c-Fos* expression in NRVMs treated with ET-1 for 10 min.  
1391 *c-Fos* expression was determined by RT-qPCR. Data is presented relative to empty  
1392 vector. For WT-MSK data (left-hand side), EV ctrl and WT-MSK ctrl, N =10, EV ET-1  
1393 and WT-MSK ET-1, N=6, n=3. For DN-MSK data (right-hand side), N=6, n=3. **G.**  
1394 Analysis of hypertrophic responses in NRVMs infected with EV or DN-MSK1 AdV  
1395 treated +/- ET-1 for 24 h. Left: RT-qPCR expression analysis of *Nppa/Anf* mRNA in  
1396 NRVMs. Data is presented relative to EV untreated cells. For EV ctrl, EV ET-1, WT-  
1397 MSK ctrl and WT-MSK ET-1, N=8, n=3. For DN-MSK ctrl and DN-MSK ET-1, N=6,

1398 n=3. Right: Cell area ( $\mu\text{m}^2$ ) as a measure of hypertrophy in NRVMs. N=4,  $n=50-80$ . **H.**  
1399 ChIP-qPCR analysis for pH3S28 abundance at *c-Jun* (left) and *c-Fos* gene promoter  
1400 regions in NRVMs infected with EV or DN-MSK1 AdV +/- ET-1 for 10 min. Top:  
1401 schematic for the site of ChIP primer amplification relative to the transcription start  
1402 sites. Below: quantification of enrichment compared with EV AdV untreated NRVMs.  
1403 For *c-Jun* ChIP data (left-hand side), N=4, n=3. For *c-Fos* ChIP data (right-hand side),  
1404 N=3, n=3. **I.** ChIP-qPCR analysis for Brg1 enrichment at *c-Jun* (left) and *c-Fos* gene  
1405 promoter regions in NRVMs infected with EV or DN-MSK1 AdV +/- ET-1 for 10 min.  
1406 Quantification of Brg1 enrichment at the *c-Jun* (Left) and *c-Fos* (Right) promoters  
1407 compared with EV AdV untreated NRVMs. For *c-Jun* ChIP data (left-hand side), N=4,  
1408 n=3. For *c-Fos* ChIP data (right-hand side), N=3, n=3. **J.** ChIP-qPCR for Brg1 at the *c-*  
1409 *Jun* and *c-Fos* gene promoters (left-right) in left ventricular tissue from adult male  
1410 Wistar rats that were administered ET-1 or Iso through jugular vein administration and  
1411 sacrificed 15 min later. N=3, n=3.

1412

1413 **Figure Supplement 3: IEG induction is a conserved feature of hypertrophy in**  
1414 **adult cardiomyocytes**

1415 **A.** Representative confocal images of immunostained ARVMs infected with adenovirus  
1416 expressing FLAG-tagged DN-Msk (kinase dead). ARVMs are stained for FLAG  
1417 (green), pH3S28 (red) and  $\beta$ -Act (purple). FLAG-tagged DN-Msk is enriched in the  
1418 nuclei in ARVMs. **B.** RT-qPCR analysis of *c-Fos* (Top) and *Nppa/Anf* (Bottom) mRNA  
1419 in ARVMs infected with EV or DN-MSK1 +/- ET-1 treatment for 15 min. For *c-Fos*  
1420 mRNA (top), EV ctrl and EV ET-1, N=4, n=3. For DN-MSK ctrl and DN-MSK ET-1,  
1421 N=3, n=3. For *Nppa/Anf* mRNA (bottom), N=3, n=3. Scale bar = 25  $\mu\text{m}$ . **C.** Analysis of  
1422 siRNA-mediated knockdown of *Msk1* in NRVMs. RT-qPCR analysis of *Msk1* mRNA



1423 expression in NRVMs transfected with scr or siMsk siRNA is shown. N=3, n=3. **D.** RT-  
1424 qPCR analysis of *c-Fos* mRNA in NRVMs transfected with scr or siMsk siRNA +/- ET-  
1425 1 for 15 min. N=4, n=3. **E.** RT-qPCR analysis of *Nppa/Anf* mRNA expression in NRVMs  
1426 transfected with scr or siMsk siRNA +/- ET-1 for 15 min. N=3, n=3. **F.** Analysis of  
1427 *Smarca4* knockdown in NRVMs. *Smarca4/Brg1* mRNA abundance was measured by  
1428 RT-qPCR in NRVMs transfected with siRNA targeting Smarca3 (siBrg1) and compared  
1429 with NRVMs transfected with scrambled control (scr) siRNA. N=3, n=3. **G.** RT-qPCR  
1430 analysis of *Myh6/Myh7* (Left) and *c-Fos* (Right) mRNA expression in NRVMs  
1431 transfected with scr or siBrg1 siRNA +/- ET-1 for 15 min. For *Myh6/Myh7* (Left), N=5.  
1432 n=3. For *c-Fos* (Right), N=6, n=3.

1433 **Figure 4: Genetic MSK inhibition attenuates IEG activation and cardiomyocyte**  
1434 **hypertrophy in vivo**

1435 **A.** RT-qPCR analysis of *Msk1* (Left) and *Msk2* (Right) mRNA expression in left  
1436 ventricle from *Msk1/2* KO mice and wild type littermates +/- Iso infusion for 1 week. WT  
1437 ctrl, N=7, WT Iso, N=4, KO ctrl, N=5, KO Iso, N=8, n=3. **B.** RT-qPCR analysis of  
1438 expression of IEGs *c-Jun* (Left) and *c-Fos* (Right) in left ventricle from *Msk1/2* KO mice  
1439 and wild type littermates +/- Iso infusion for 1 week. WT ctrl, N=5, WT Iso, N=4, KO  
1440 ctrl, N=5, KO Iso, N=5, n=3. **C.** RT-qPCR analysis of *Smarca4/Brg1* mRNA expression  
1441 in left ventricle from *Msk1/2* KO mice and wild type littermates +/- Iso infusion for 1  
1442 week. WT ctrl, N=5, WT Iso, N=4, KO ctrl, N=5, KO Iso, N=5, n=3. **D.** Immunostaining  
1443 for pMSK in cardiomyocyte nuclei in left ventricular cardiac sections in *Msk1/2* KO mice  
1444 and wild type littermates +/- Iso infusion for 1 week. Cardiomyocyte nuclei are  
1445 demarcated with Nesprin. Left: Quantification of pMSK in Nesprin+ve nuclei. Right:  
1446 Representative immunostaining images for pMSK (green), Nesprin (red) and nuclei are  
1447 stained with DAPI (blue). N=4,  $n=30-160$ . Scale bar = 50  $\mu$ m. **E.** Immunostaining for

1448 pH3S28 in cardiomyocyte nuclei in left ventricular cardiac sections in *Msk1/2* KO mice  
1449 and wild type littermates +/- Iso infusion for 1 week. Cardiomyocyte nuclei are  
1450 demarcated with Pcm-1. Left: Quantification of pH3S28 in Pcm-1+ve nuclei. Right:  
1451 Representative immunostaining images for pH3S28 (red), Pcm-1 (green) and nuclei  
1452 are stained with DAPI (blue). N=4,  $n=30-160$ . Scale bar = 50  $\mu$ m. **F.** Fractional  
1453 shortening in *Msk1/2* KO mice and wild type littermates at baseline (Iso=0) and +/- Iso  
1454 infusion for 1 week (Iso=1), derived from 2D echocardiography data. WT ctrl, N=6, WT  
1455 Iso, N=4, KO ctrl, N=5, KO Iso, N=6. **G.** Posterior wall dimension in diastole in *Msk1/2*  
1456 KO mice and wild type littermates at Iso=0 and +/- Iso=1, derived from 2D  
1457 echocardiography data. WT ctrl, N=6, WT Iso, N=4, KO ctrl, N=5, KO Iso, N=6. **H.** RT-  
1458 qPCR analysis of the markers of pathological hypertrophy *Nppa/Anf*, *Nppb/Bnp* and  
1459 *Myh7* mRNA expression in left ventricle from *Msk1/2* KO mice and wild type littermates  
1460 +/- Iso infusion for 1 week. N=5, WT Iso, N=4, KO ctrl, N=5, KO Iso, N=5, n=3. **I.**  
1461 Quantification of left ventricular interstitial fibrosis, measured as percentage (%) area  
1462 of extracellular matrix from Picro Sirius Red staining in left ventricular tissue from  
1463 *Msk1/2* KO mice and wild type littermates +/- Iso infusion for 1 week. WT ctrl, N=7, WT  
1464 Iso, N=4, KO ctrl, N=7, KO Iso, N=5, n=3. **J.** RT-qPCR analysis of *Col1a1* mRNA  
1465 expression in left ventricular tissue from *Msk1/2* KO mice and wild type littermates +/-  
1466 Iso infusion for 1 week. WT ctrl, N=5, WT Iso, N=4, KO ctrl, N=5, KO Iso, N=5, n=3.

1467

1468 **Figure Supplement 4: Genetic MSK inhibition attenuates IEG activation and**  
1469 **cardiomyocyte hypertrophy in vivo**

1470 **A.** Heat map showing expression of immediate early gene (*c-Jun*, *c-Fos*, *FosL1*, *FosB*,  
1471 *JunD*), *Smarca4/Brg1*, *Erk1/2* and *Msk1/2* in left ventricular Pcm-1+ve cardiomyocyte  
1472 RNA-seq data in models of pathological (Ascending aortic banding, AB) or

1473 physiological (treadmill training, run) in male Sprague Dawley rats. Data extracted from  
1474 (Thienpont et al., 2017). Data available at GEO GSE66653. **B.** RT-qPCR analysis of  
1475 *Msk1* and *Msk2* mRNA expression in NRVMs treated with ET-1 for 24 h. N=4, n=3. **C.**  
1476 Representative M-mode echocardiogram from WT/*Msk* KO mice +/- Iso for 1 week.  
1477 Echocardiographic measurements indicated. IVSd=Interventricular septal dimension  
1478 end systole, IVSd=Interventricular septal dimension end diastole, LVDs=Left ventricle  
1479 diameter end systole, LVDd=Left ventricular diameter end diastole, PWd=posterior  
1480 wall dimension end diastole, PWs=posterior wall dimension end systole. **D.**  
1481 Representative left ventricular tissue sections from WT/*Msk* KO mice +/- Iso for 1 week  
1482 showing Picro sirius red staining for collagen. The scale bar indicates 50  $\mu$ m. **E.**  
1483 Terminal deoxynucleotidyl transferase dUTP nick end labelling (TUNEL) staining of left  
1484 ventricular cardiac sections in *Msk1/2* KO mice and wild type littermates +/- Iso infusion  
1485 for 1 week. TUNEL assay measures fragmented DNA as a mark of apoptosis. Left:  
1486 Quantification of TUNEL in cardiac nuclei. Right: Representative immunostaining  
1487 images for TUNEL (green) and nuclei are stained with DAPI (blue). N=3,  $n$ =100-250.  
1488 Scale bar indicates 20  $\mu$ m. **F.** RT-qPCR analysis of pro-apoptotic marker genes  
1489 caspase 3 (Casp3), caspase 9 (Casp9) mRNA expression in left ventricle from *Msk1/2*  
1490 KO mice and wild type littermates +/- Iso infusion for 1 week. WT ctrl, N=5, WT Iso,  
1491 N=4, KO ctrl, N=5, KO Iso, N=5, n=3. **G.** RT-qPCR analysis of the expression of the  
1492 anti-apoptotic marker gene *Bcl2* mRNA expression in left ventricle from *Msk1/2* KO  
1493 mice and wild type littermates +/- Iso infusion for 1 week. WT ctrl, N=5, WT Iso, N=4,  
1494 KO ctrl, N=5, KO Iso, N=5, n=3.

1495

1496 **Figure 5: The MAPK-MSK-pH3S28 axis is conserved in the hypertrophic**  
1497 **response in humans.**

1498 **A.** Confocal immunofluorescence analysis of pH3S28 in isolated human donor  
1499 cardiomyocytes treated for 15 min with ET-1 or Iso +/- PD. Left: Quantification of  
1500 immunostaining of nuclear pH3S28. Right: Representative images of isolated  
1501 cardiomyocytes stained for pH3S28 (red),  $\alpha$ -Act (cyan), nuclei stained with DAPI  
1502 (blue). N=4,  $n$ =12 - 123. Scale bar = 20  $\mu$ m. **B.** Confocal immunofluorescence analysis  
1503 of pMSK in isolated Immunostaining in isolated human donor cardiomyocytes treated  
1504 for 15 min with ET-1 or Iso +/- PD. Left: Quantification of immunostaining of nuclear  
1505 pMSK. Right: Representative images of isolated cardiomyocytes stained for pMSK  
1506 (green),  $\alpha$ -Act (purple), nuclei stained with DAPI (blue). N=4,  $n$ =13 - 136. Scale bar =  
1507 20  $\mu$ m. **C-E.** RT-qPCR analysis of mRNA expression of indicated genes in human  
1508 hypertrophic left ventricular tissue (H) compared with non-failing (C). In Figure 5C and  
1509 5E, C, N=5, H, N=4, n=3. In Figure 5D, C, N=4, H, N=4, n=3. **C.** RT-qPCR analysis of  
1510 *MSK1* and *MSK2* mRNA expression. **D.** RT-qPCR analysis of expression of immediate  
1511 early gene components of the AP-1 transcription factor. **E.** RT-qPCR analysis of  
1512 *SMARCA4 (BRG-1)*. **F.** ChIP-qPCR analysis for pH3S28 enrichment at the *c-JUN* and  
1513 *c-FOS* promoters in Pcm-1 +ve cardiomyocyte nuclei from human hypertrophic left  
1514 ventricular tissue (H) compared with non-failing (C). N=3, n=3. **G.** ChIP-qPCR for  
1515 pH3S28 enrichment at the *SMARCA4/BRG-1* promoter in Pcm-1 +ve cardiomyocyte  
1516 nuclei from human hypertrophic left ventricular tissue (H) compared with non-failing  
1517 (C). N=3, n=3.

1518

1519 **Figure 6: Summary cartoon of main findings of this study indicating pathway by**  
1520 **which MSK couples GPCR activation with IEG induction during the cardiac**  
1521 **hypertrophic response**

Figure 1

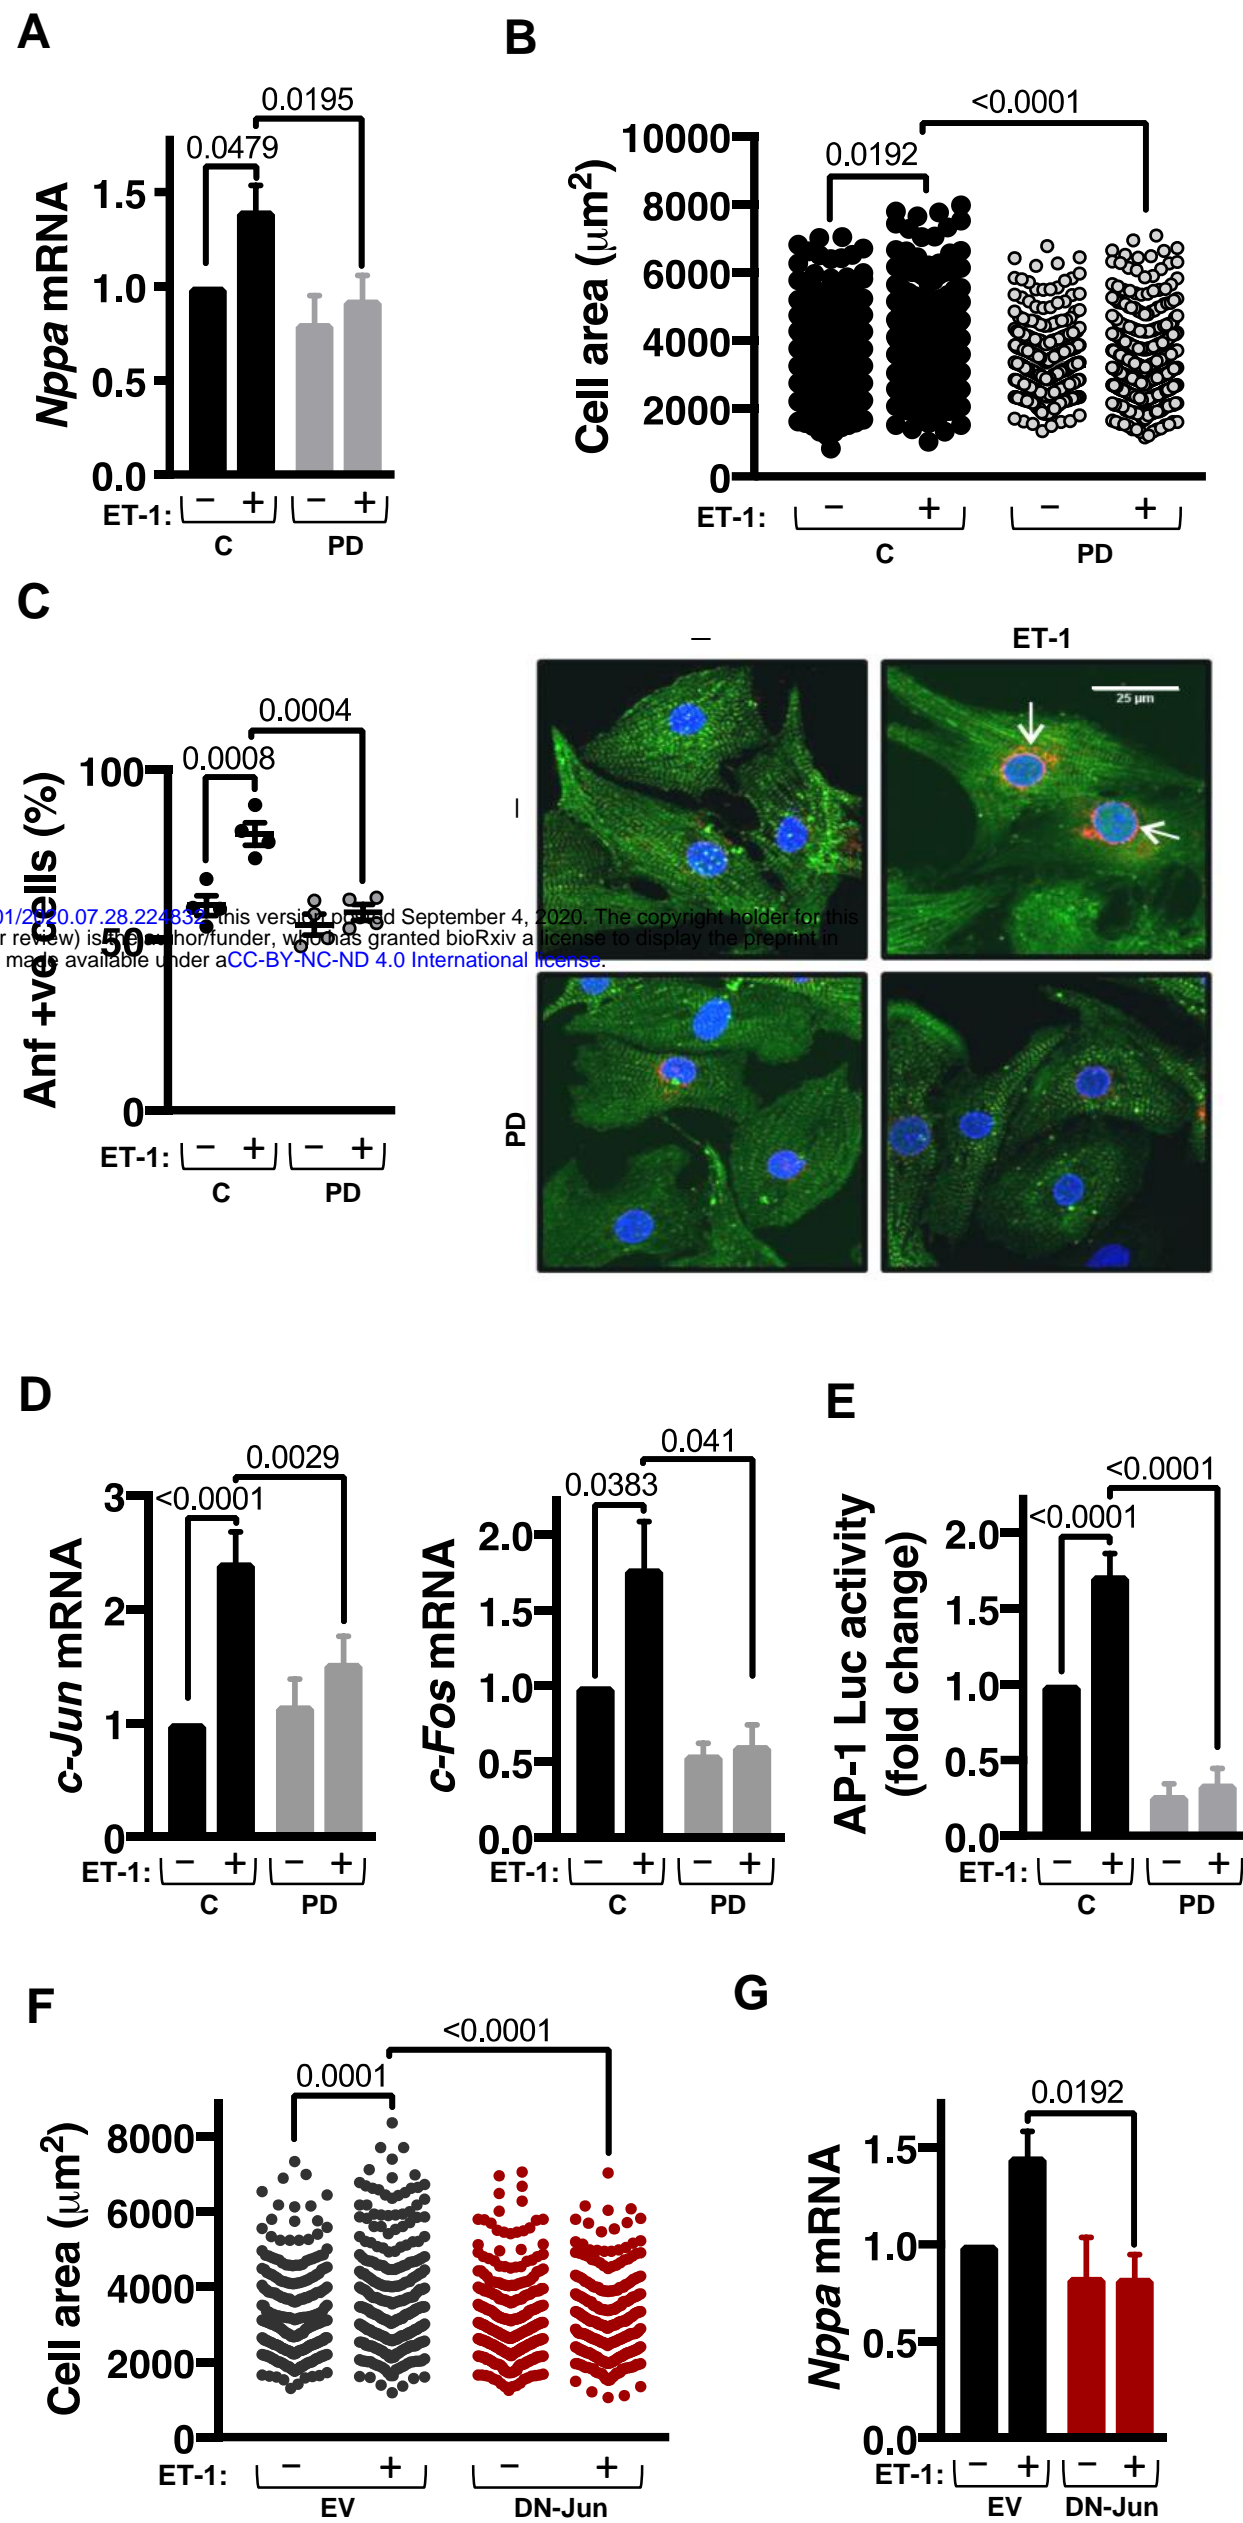

# Supplementary Figure 1

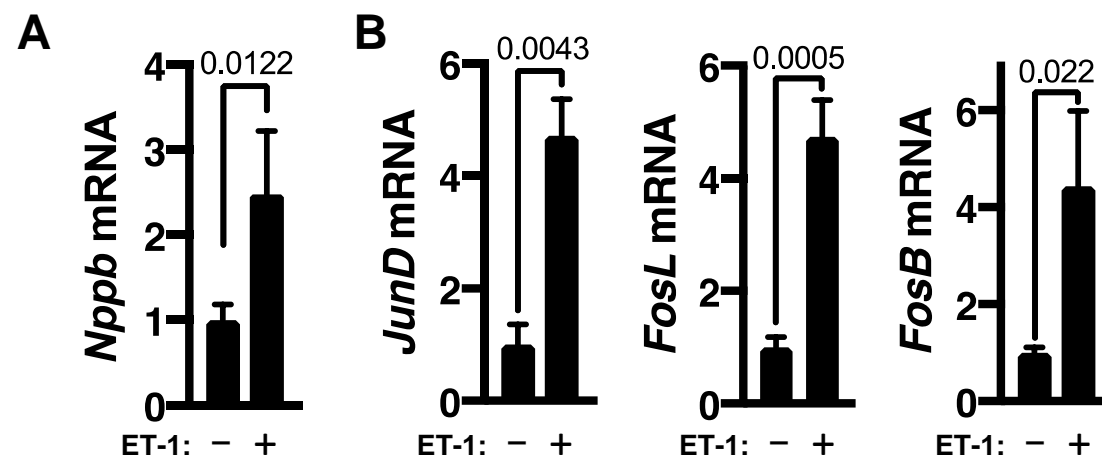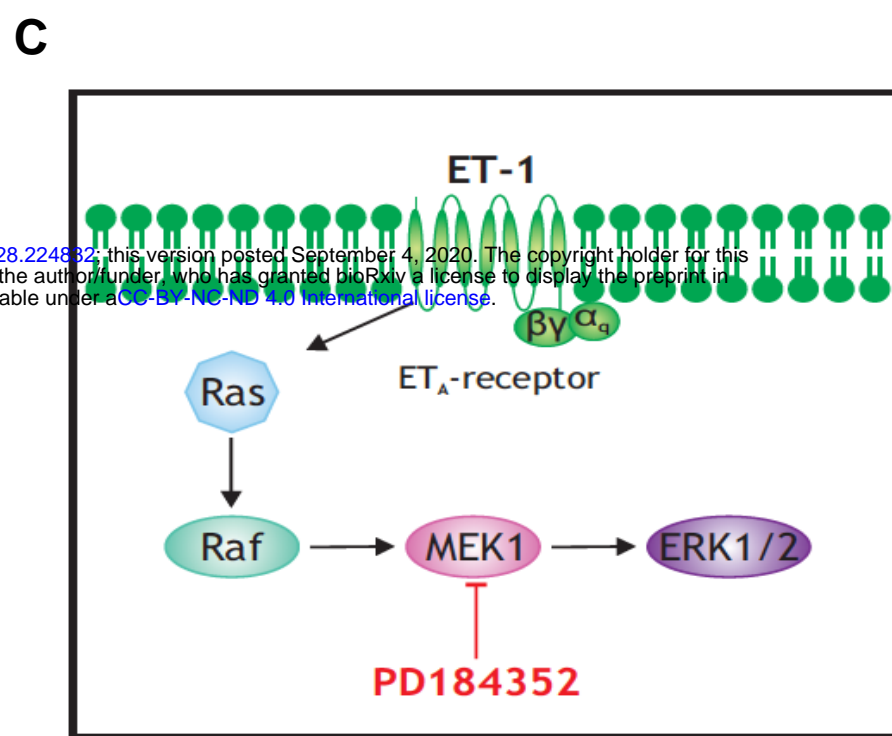

bioRxiv preprint doi: <https://doi.org/10.1101/2020.07.28.224832>; this version posted September 4, 2020. The copyright holder for this preprint (which was not certified by peer review) is the author/funder, who has granted bioRxiv a license to display the preprint in perpetuity. It is made available under aCC-BY-NC-ND 4.0 International license.

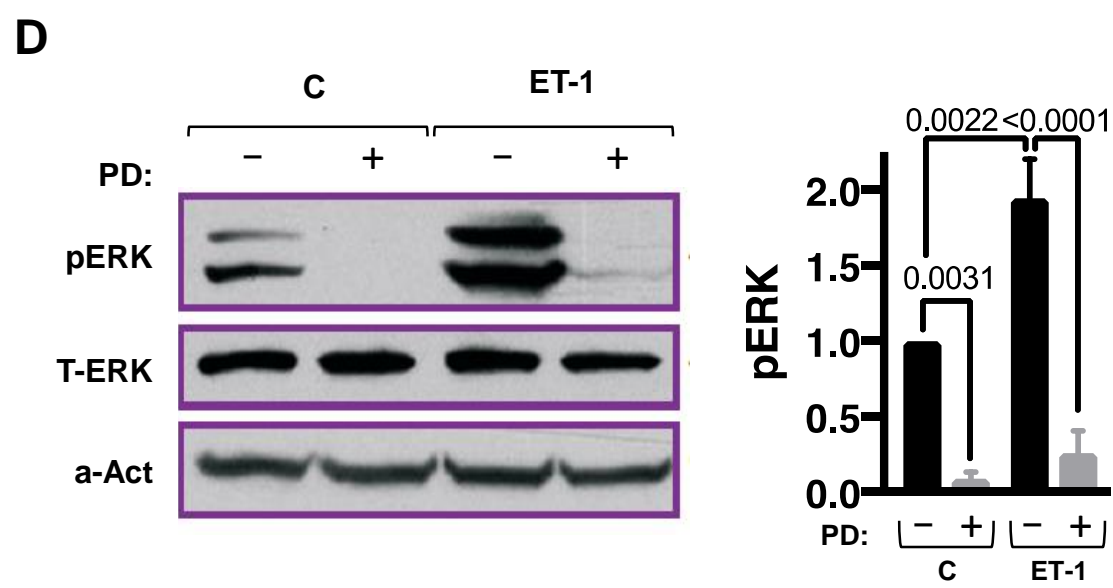

**Figure 2**

**A**

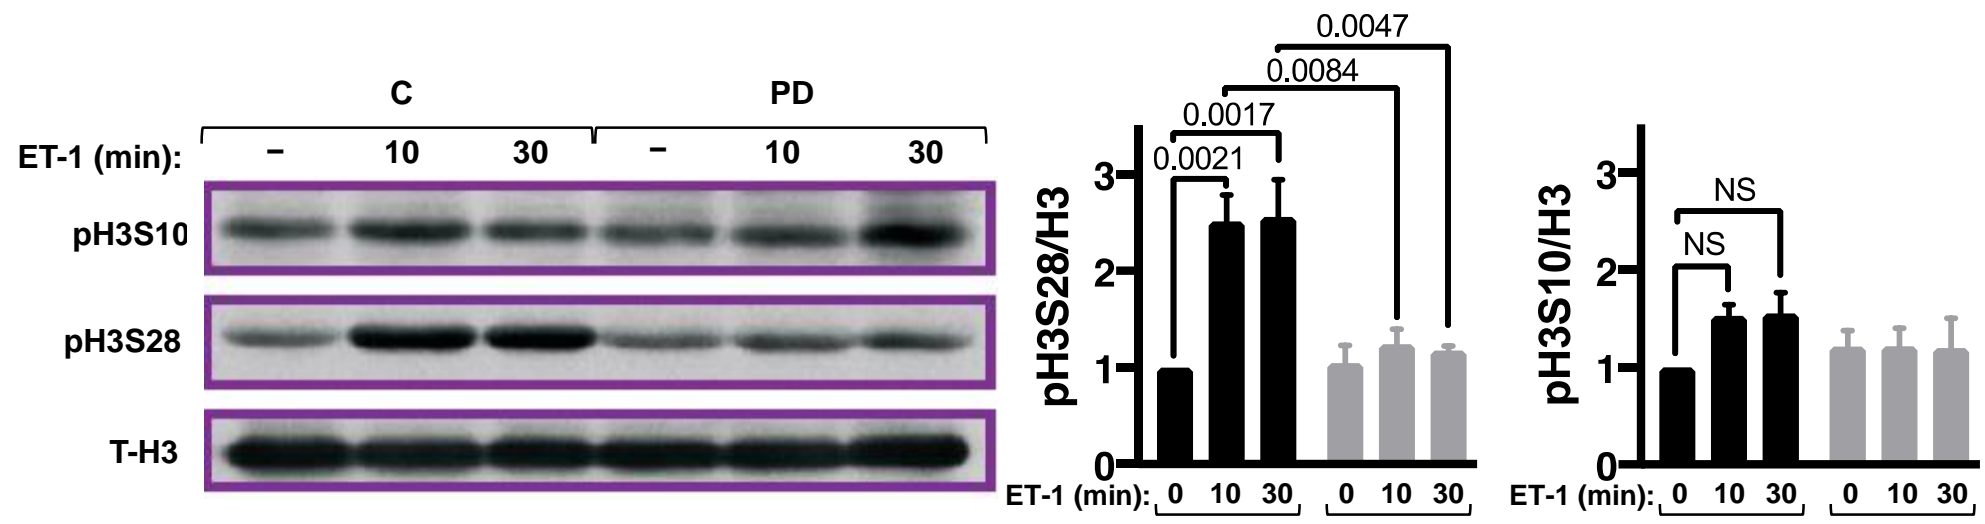

**B**

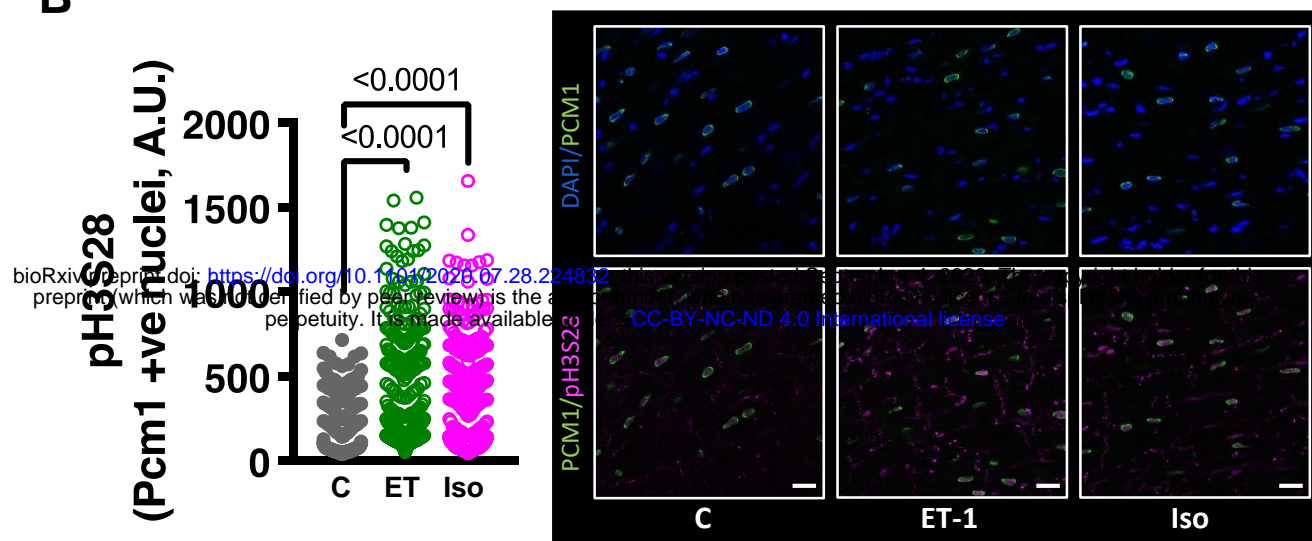

**C**

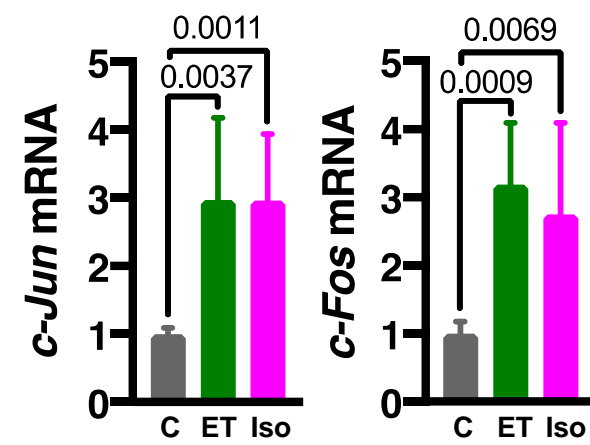

**D**

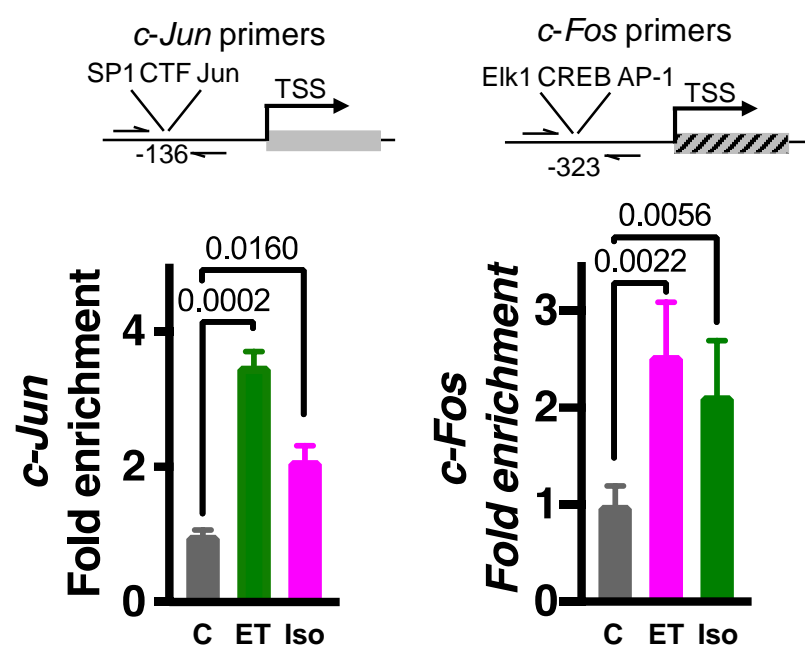

## Supplementary Figure 2

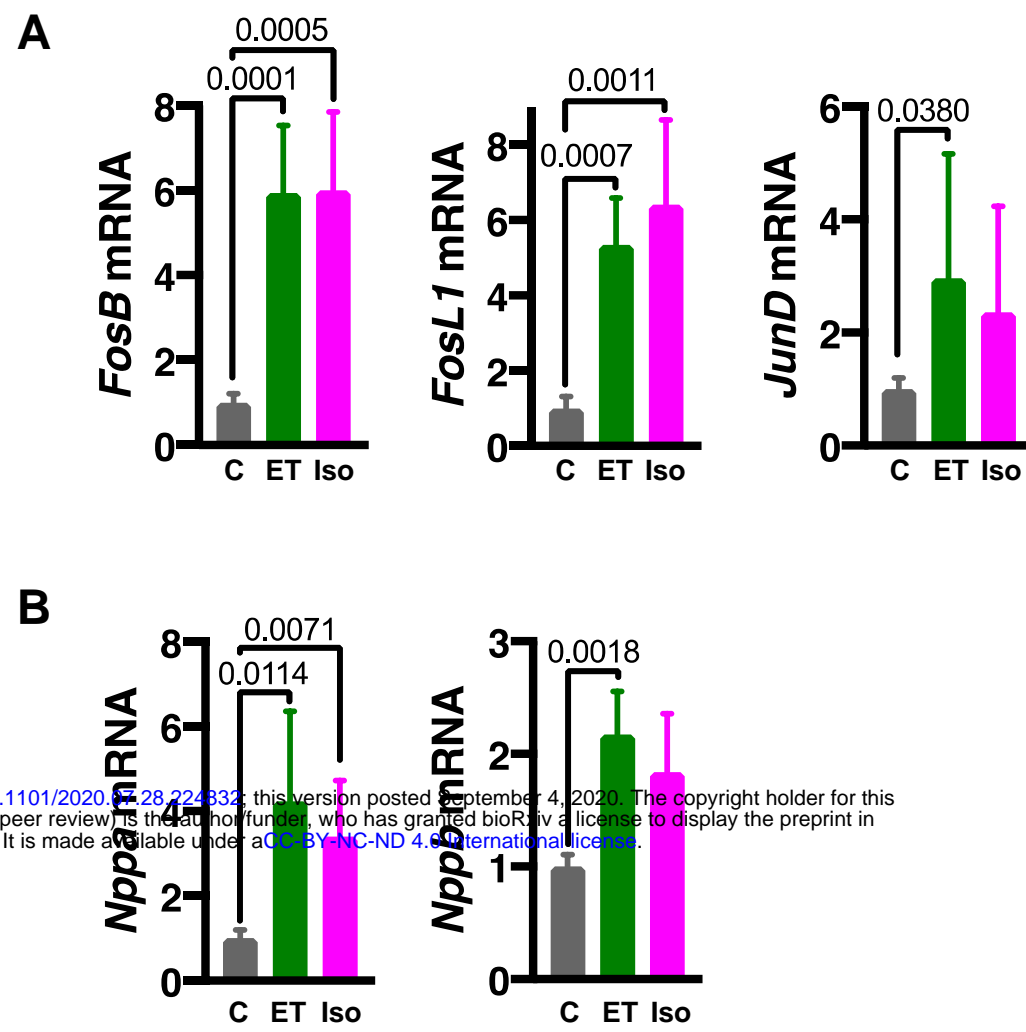



**Figure 3**

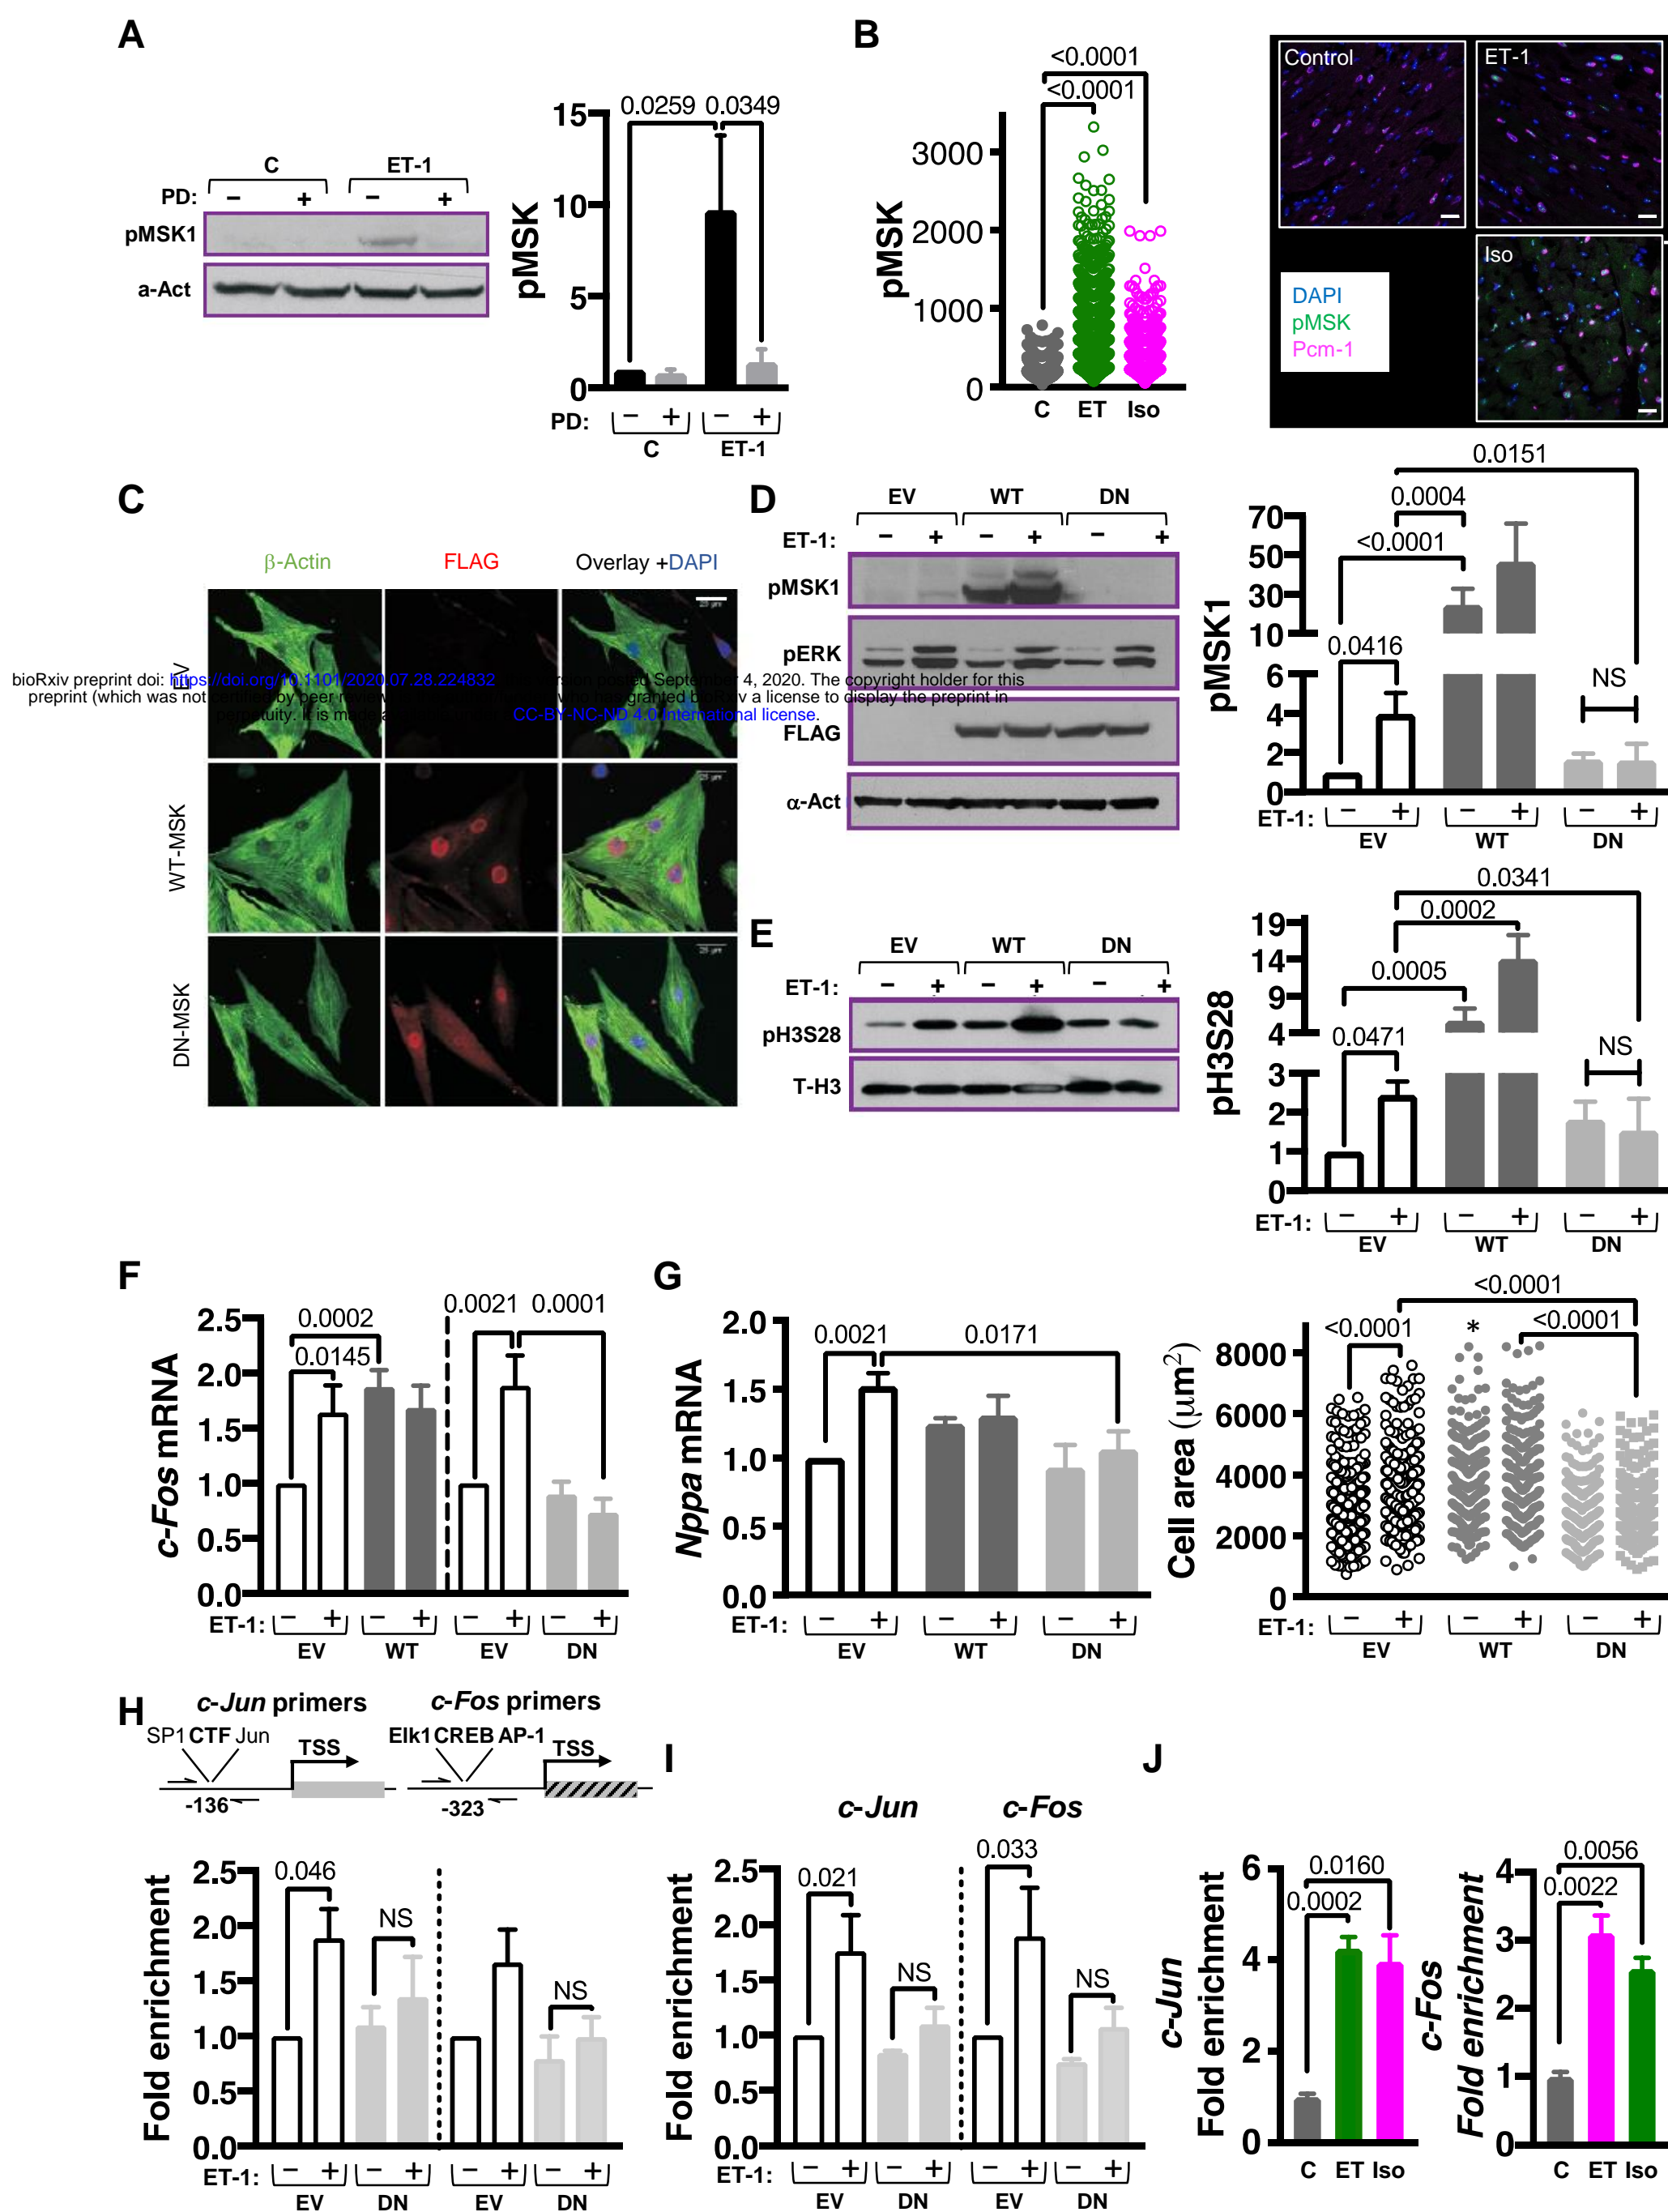

# Supplementary Figure 3

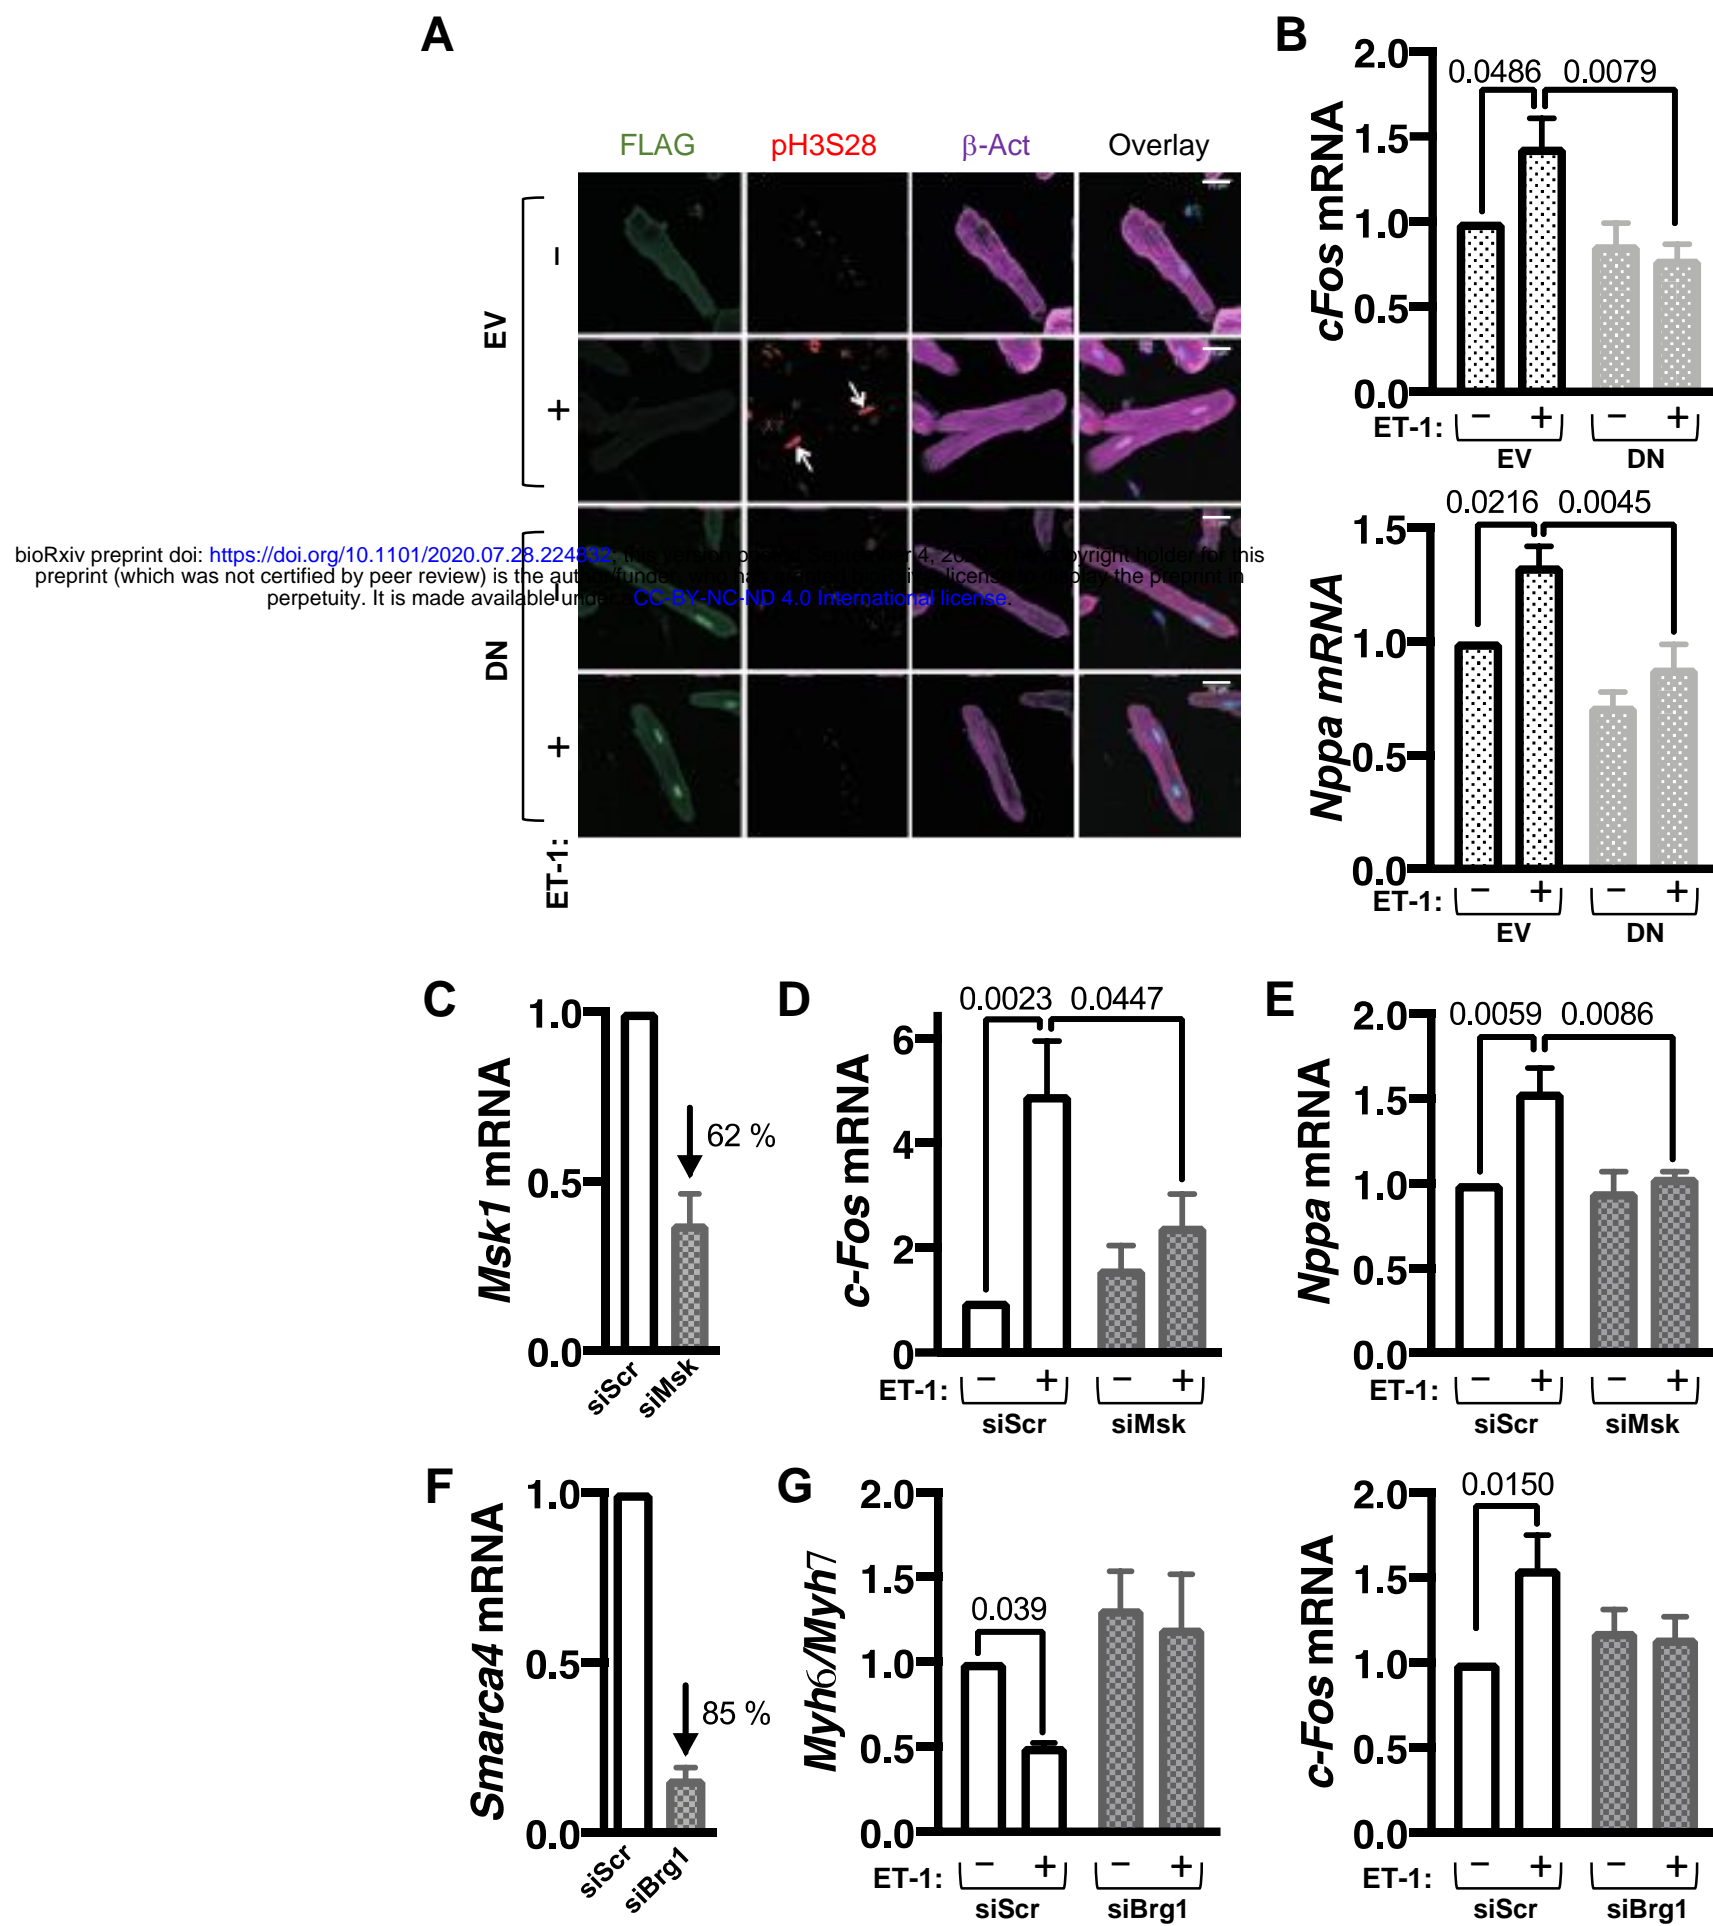

**Figure 4**

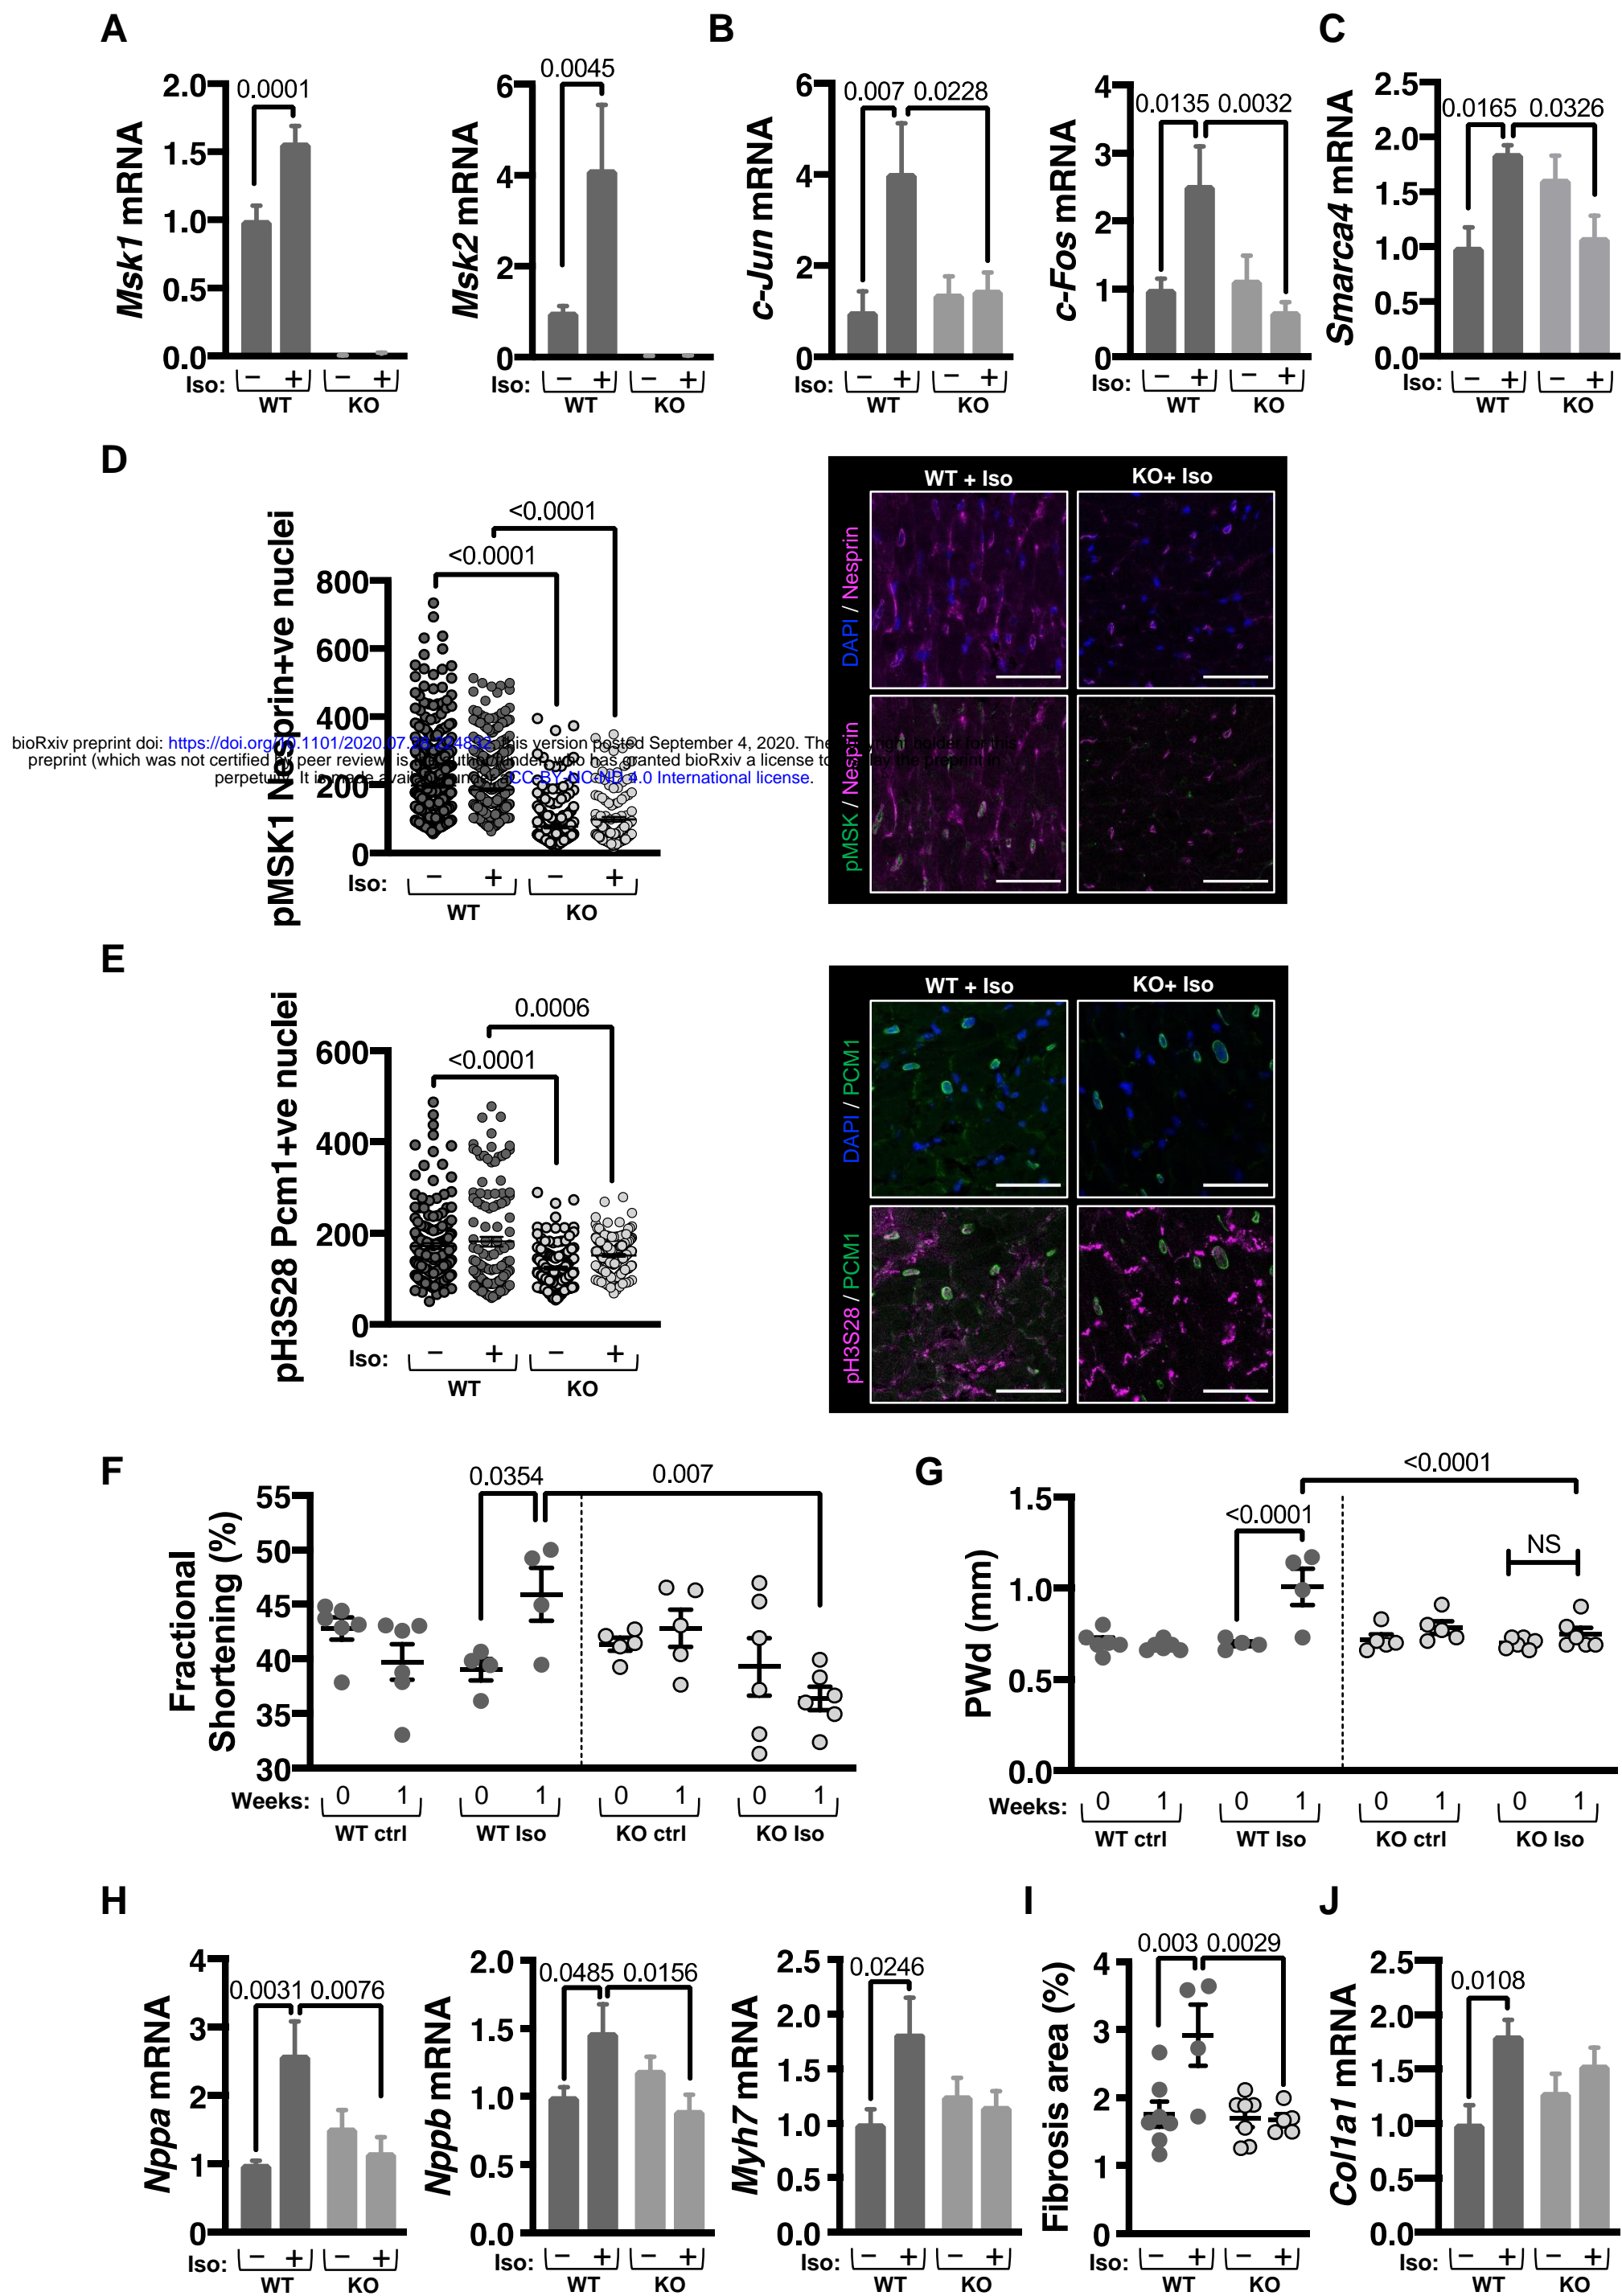

# Supplementary Figure 4

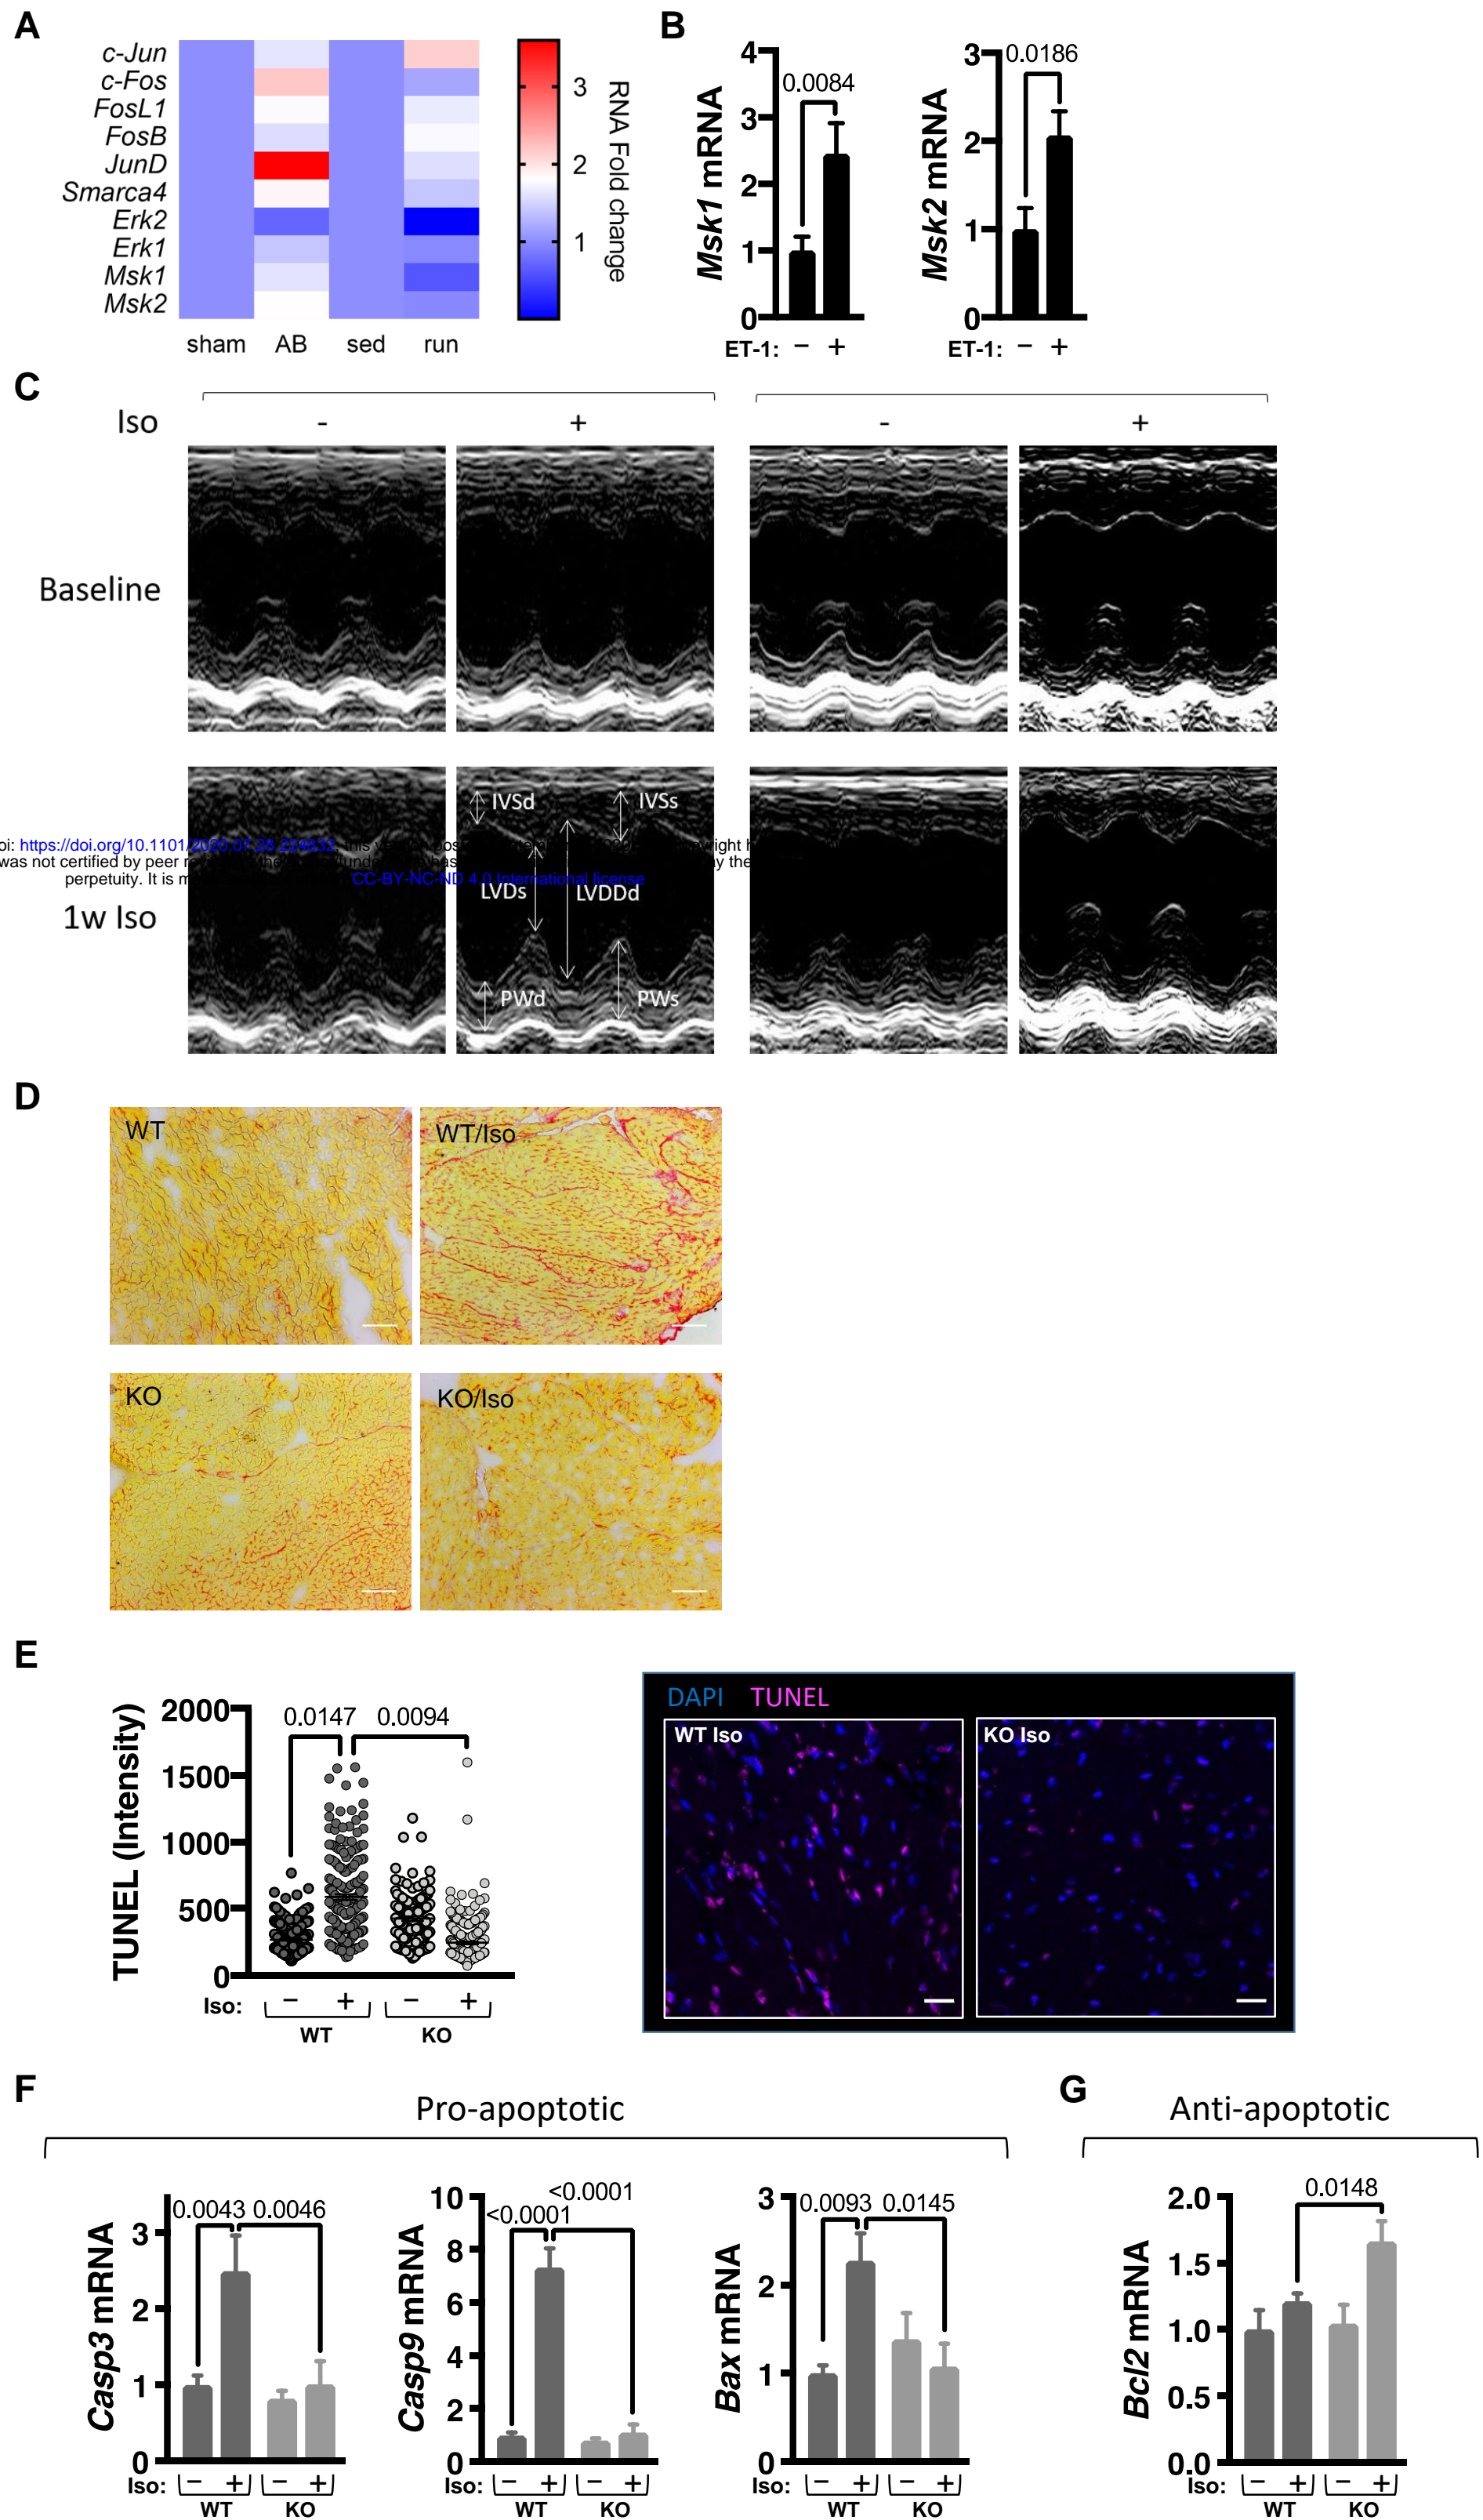

Figure 5

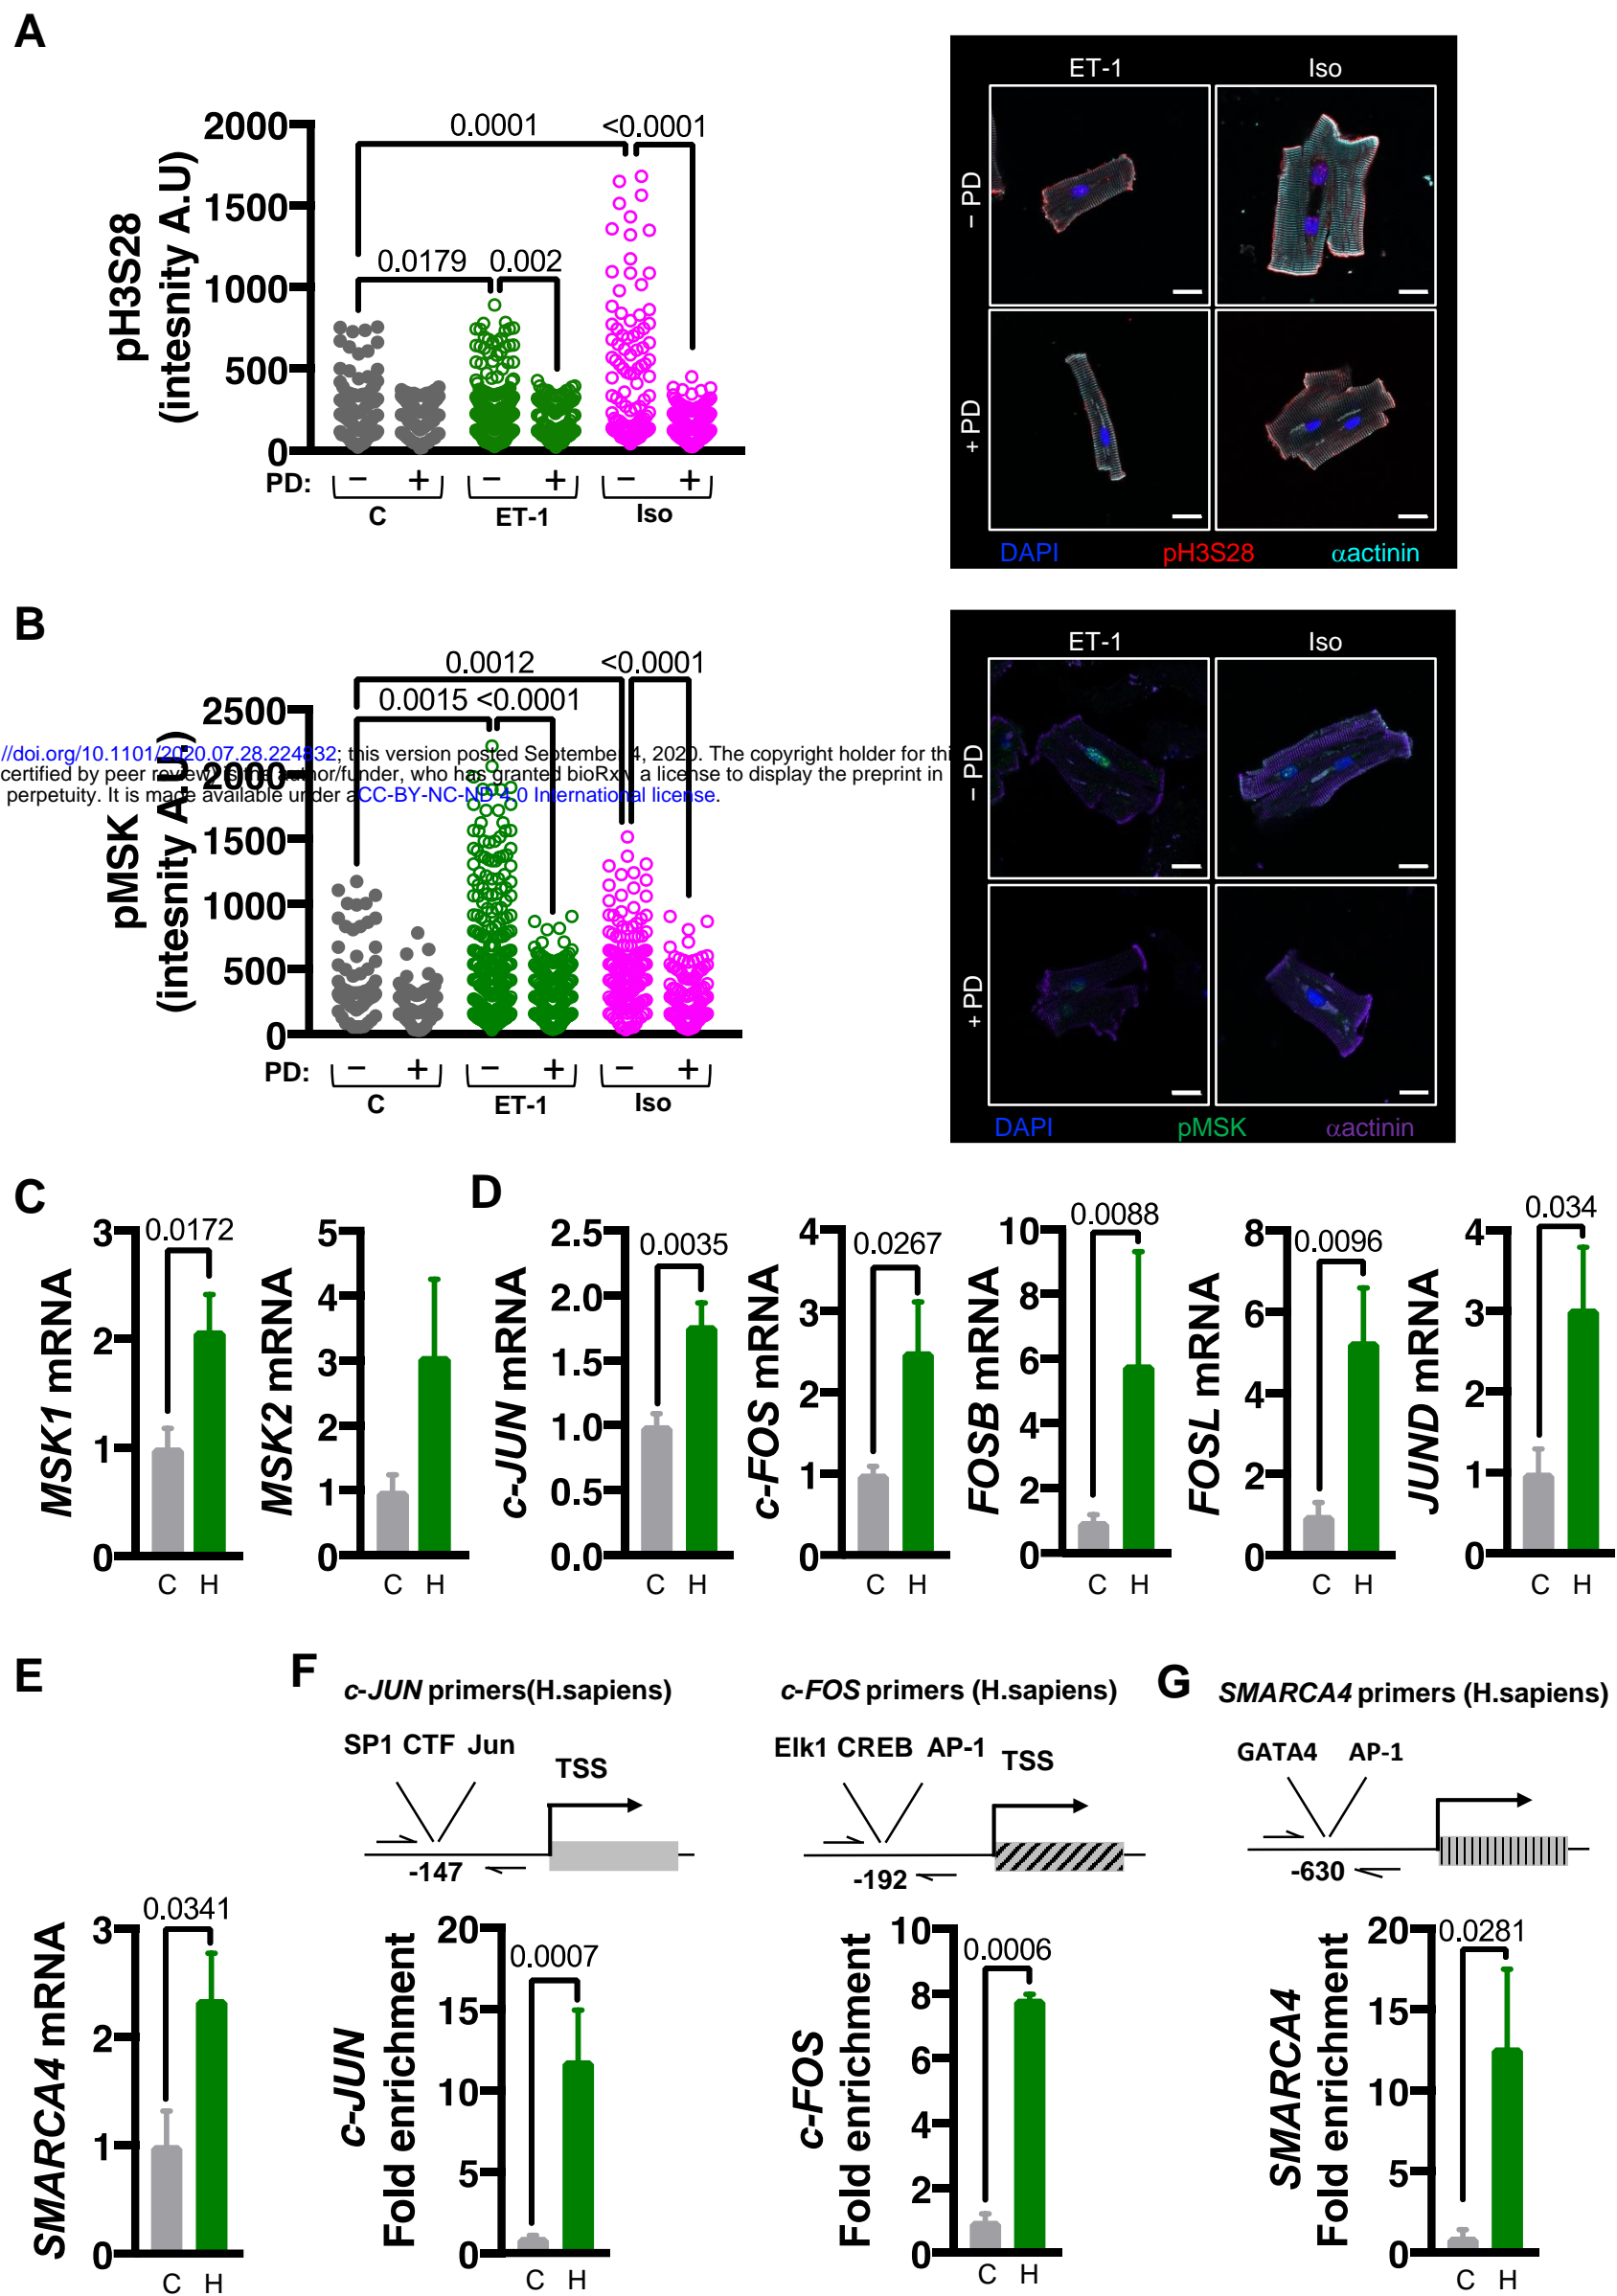

Figure 6

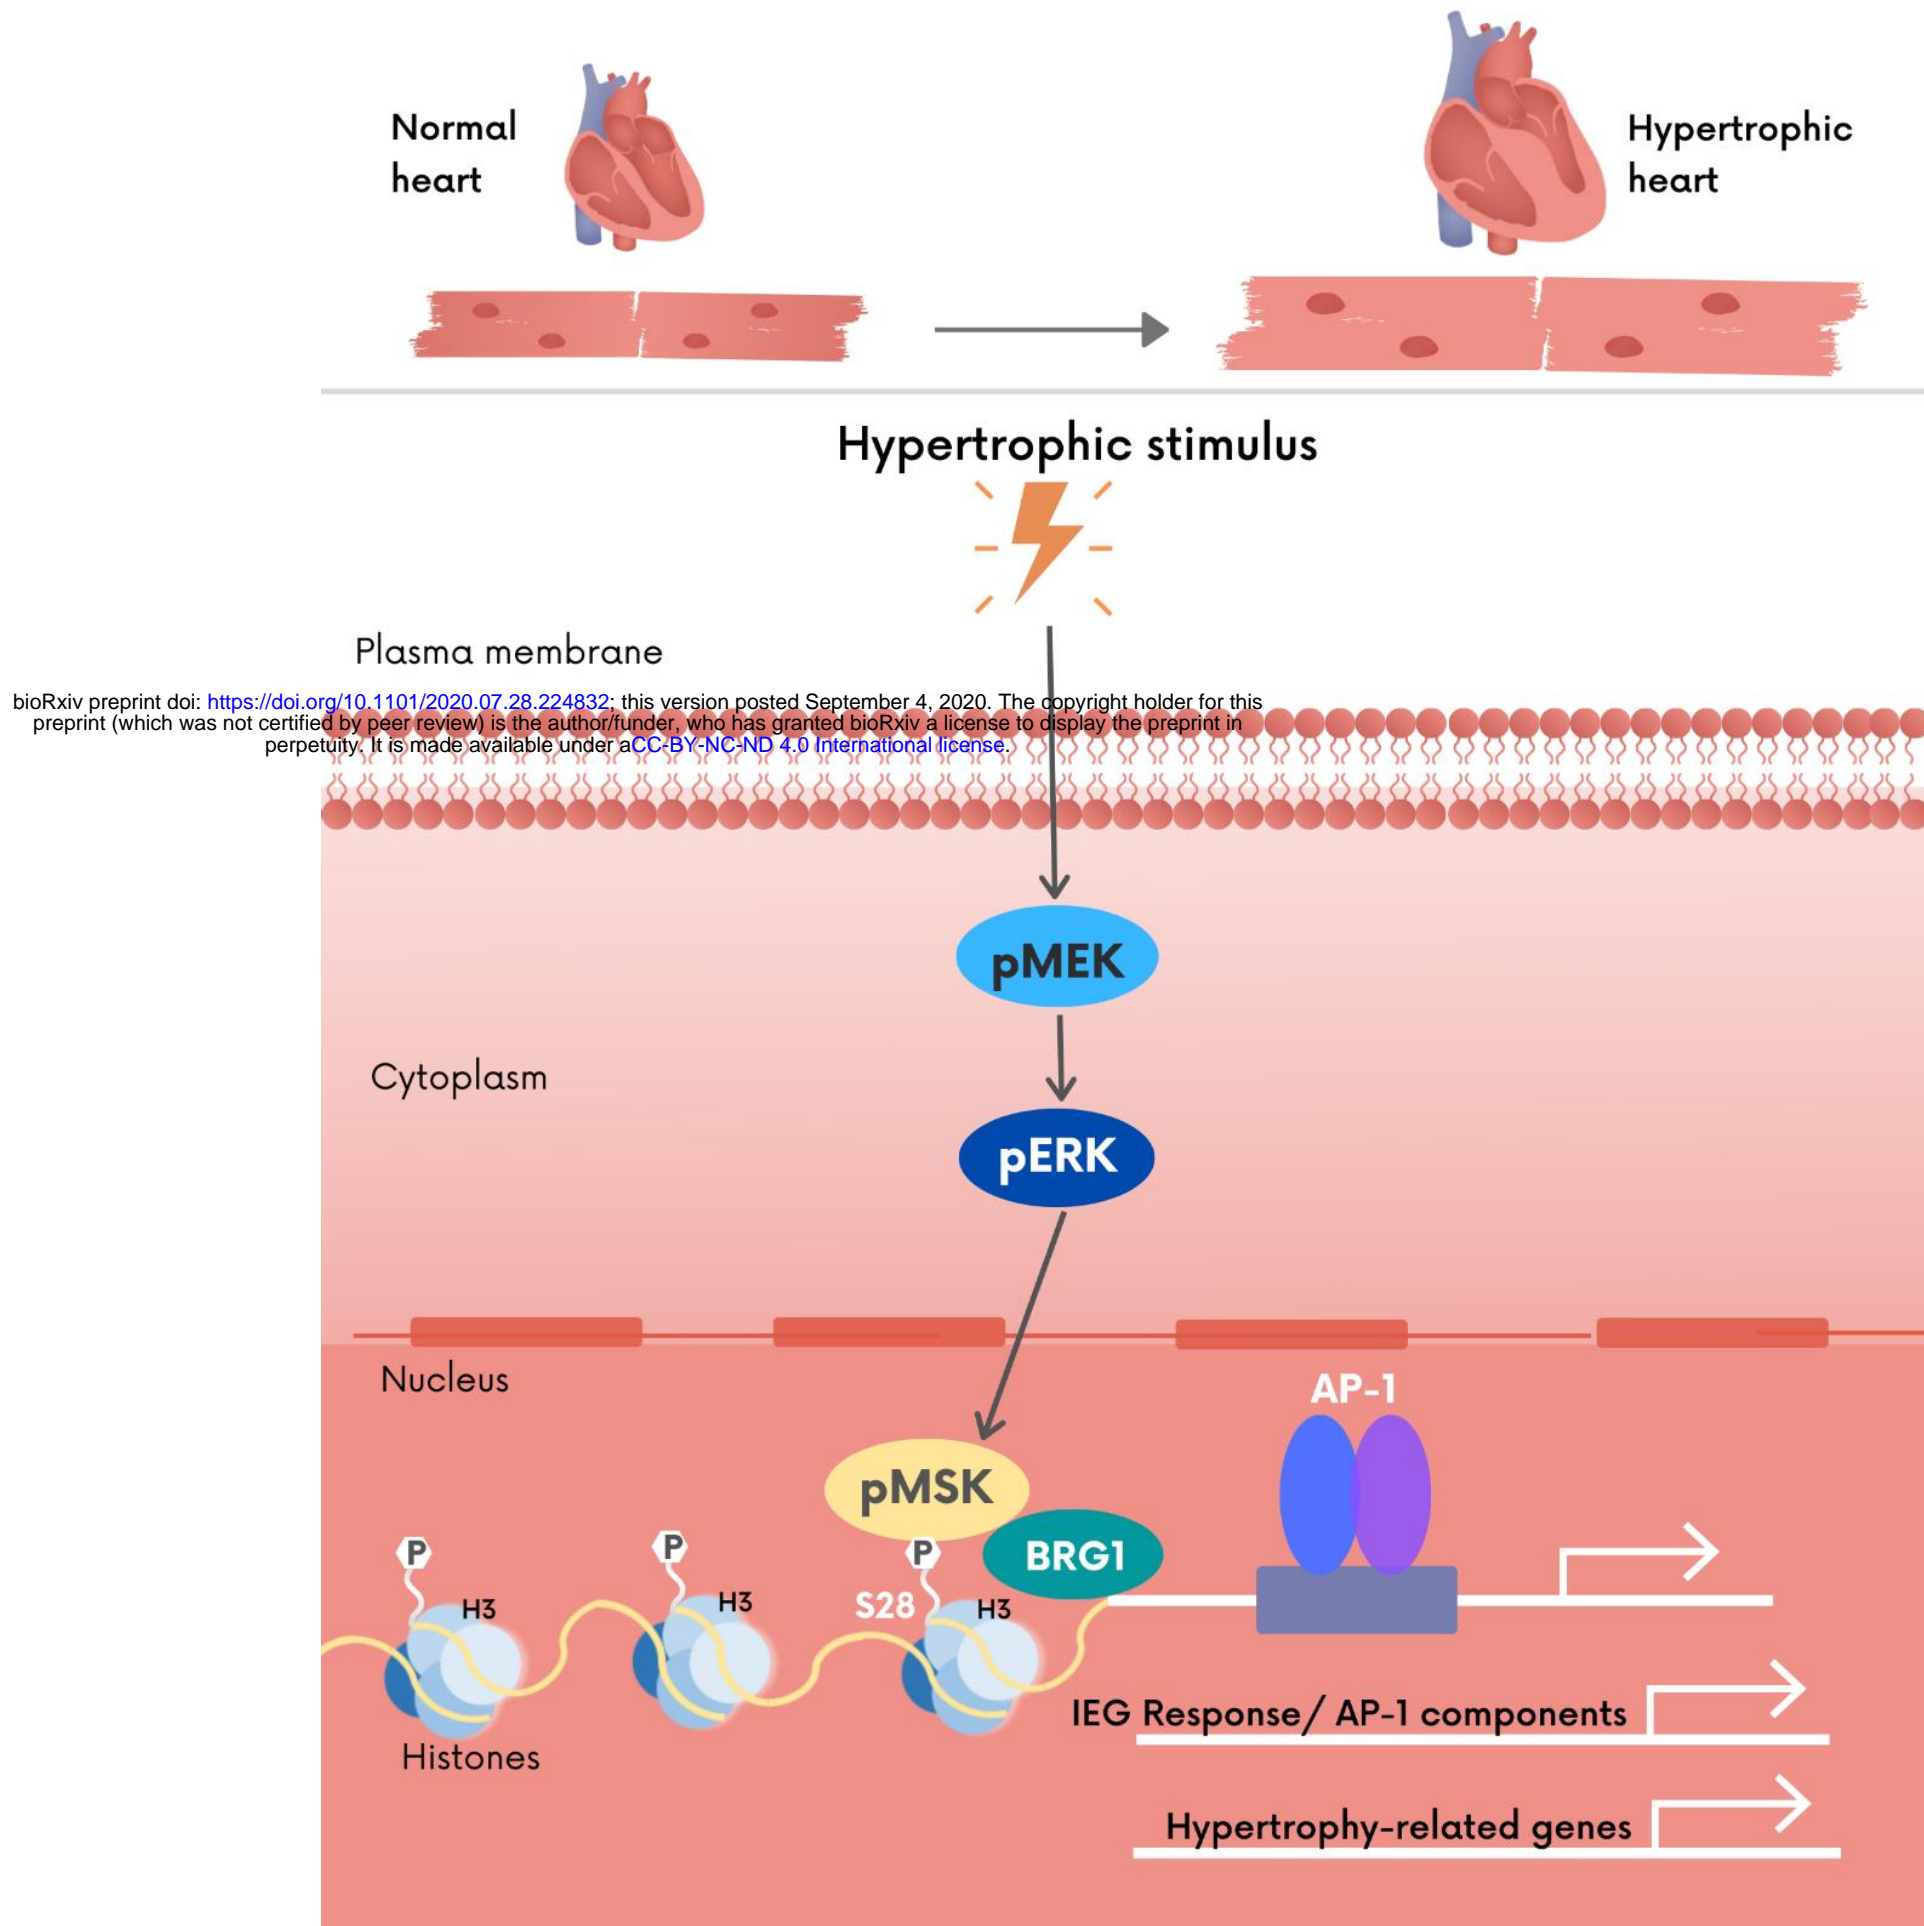

Source: https://www.biorxiv.org/content/10.1101/2020.07.28.224832v2.full.pdf
